# Supplementary material for: Structured foresight reframes risk around transitions towards sustainable and resilient farming in a volatile world
Source: Research Square preprint supplement (doi:10.21203/rs.3.rs-8254015/v1), 2025-12-11
Supplement: Supplementary file 1 [file 043c60244de3ee05fb4142ca.xlsx]

## Sheet: Figure S1
	Figure S1. Relative change in protein output and cattle numbers for the Sustainable Intensification pathway by 2050 compared with 2020 (set at 1), with different definitions of climate neutrality (GWP100 net zero, split gas, a simple downscaling of the EU net zero target involving a 30% reduction in agricultural emissions relative to 2020, and application of a GWP* CO2 warming equivalent net zero…

## Sheet: Table S1
	Table S1. Matrix of impacts associated with Business as Usual and the four studied transition pathways under five alternative future contexts as downscaled from the Shared Socioeconomic Pathways 1-5, via a series of inferred implications for Ireland.																		40-60	60-80	80-100
	SSP	Global narrative	Implications for Ireland’s AFOLU sector	Business as Usual	Sustainable Intensification	Cattle + Nature	Diversified Protein	Bioeconomy		BAU	SI	C+N	DP	BE		BAU	SI	C+N	DP	BE					BAU	SI	C+N	DP	BE
	1	Farming: Improvements in ag productivity; rapid diffusion of best practices	Reduced demand for meat and high demand for alternative proteins. High demand for alternative energy sources and negative emissions, including BECCS. High reputational and economic costs for emissions and nutrient leakage. High payments for ecosystem services delivery.	Part-time beef farming falls behind on technical and environmental efficiency of front-runner systems globally.	Focus on efficient dairy systems maintains competitiveness.	Part-time beef farming and extensive farming approaches fall behind on technical efficiency of front-runner systems globally.	Innovation in protein value chains maintains Irish agri-food sector competitive advantage. Set up to exploit shift towards more sustainable diets.	Innovation in protein value chains maintains Irish agri-food sector competitive advantage. Set up to exploit shift towards more sustainable diets.		1	3	1	3	3										SSP1	0.444444	0.722222	0.666667	0.944444	1		0.755556
		Land use: Strong regulations to avoid environmental trade-offs		Farming falls further behind regulatory requirements; potentially very high compliance costs at farm and national scale (e.g. via purchase of credits for EU ESR compliance). 7% reduction in HNV land.	Complies with split gas climate neutrality. Up to 1.3 million ha of "available" land, potentially increasing HNV land area by 51% vs 2020. However, dairy and dairy-beef production concentrated on 1.6 million ha intensively farmed land - local water quality risks.	Within climate neutrality constraint, extensive systems support biodiversity through a land-sharing approach. Afforestation with 50% broadleaf forests and low stocking densities lead to 3.2 million ha HNV land.	Within climate neutrality constraint, diversified land use creates opportunity to improve landscape-level biodiversity and avoid localised impacts - with appropriate regulation. Over 1 million ha available for other uses, and 51% more HNV land vs 2020.	Within climate neutrality constraint, diversified land use creates opportunity to improve landscape-level biodiversity and avoid localised impacts - with appropriate regulation. Not much available land, but HNV area up 41% vs 2020.		1	2	3	3	3										SSP2	0.611111	0.722222	0.666667	0.833333	0.888889		0.744444
		Diet & food demand: Low-meat diets		Reduced demand for beef and possible carbon taxes on GHG-intensive products such as beef - lower farm gate beef prices and/or higher production costs.	Milk production up 32% vs 2020 - international demand for dairy exports likely to remain high. Beef production down 45% vs 2020, reducing exposure to reduced meat demand. However, little diversification to exploit emerging alternative protein markets.	Much reduced exports owing to relatively high GHG-intensity of production and fewer offsets to achieve climate neutrality - 58% and 64% lower milk & beef production vs 2020. Farming not adapted to exploit demand for alternative proteins.	Innovation in protein value chains maintains Irish agri-food sector competitive advantage. Set up to exploit shift towards more sustainable diets. Over 30% more protein produced vs 2020.	Innovation in protein value chains maintains Irish agri-food sector competitive advantage. Set up to exploit shift towards more sustainable diets. Over 50% more protein produced vs 2020.		1	2	1	3	3										SSP3	0.388889	0.444444	0.611111	0.666667	0.722222		0.566667
		Trade: Moderate		Always some risks of specific market access restrictions in major import markets for concentrated dairy and beef exports.	Always some risks of specific market access restrictions in major import markets for concentrated dairy and beef exports.	Always some risks of specific market access restrictions in major import markets for concentrated dairy and beef exports.	Diversification reduces specific trade risks	Diversification reduces specific trade risks		2	2	2	3	3										SSP4	0.444444	0.666667	0.555556	0.777778	0.833333		0.655556
		Energy: Efficiency & renewable focus		Not prepared to exploit demand for alternative feedtsocks - low land availability.	Land available for alternative (energy) production, but only biomethane to substitute 10% baseline natural gas demand realised in this pathway.	Only biomethane to substitute 10% baseline natural gas demand realised in this scenario. No additional land available for alternative (energy) production.	Some additional biomethane generation in grass-protein biorefineries, beyond the 10% baseline natural gas demand substituted by biomethane. Some additional land available for alternative energy generation, but not used in this pathway.	This pathway dramatically expands bioenergy, including BECCS, production to meet increasing demand for disptachable renewable energy and negative emissions.		1	2	2	2	3										SSP5	0.555556	0.722222	0.611111	0.777778	0.666667		0.666667
		Climate impact: Low		Significant but manageable risks within confined climate change. Continued trend of increasing frequency of "fodder crises" owing to poor grass growth under prolonged unfavourable weather conditions.	Significant but manageable risks within confined climate change. Continued trend of increasing frequency of "fodder crises" owing to poor grass growth under prolonged unfavourable weather conditions.	Significant but manageable risks within confined climate change. Grassland less intensively managed, providing a buffer for reduced grass growth during prolonged unfavourable weather conditions.	Significant but manageable risks within confined climate change. Diversification mitigates overall farming impact of specific effects on particular systems in any given year.	Significant but manageable risks within confined climate change. Diversification mitigates overall farming impact of specific effects on particular systems in any given year.		2	2	3	3	3		0.444444	0.722222	0.666667	0.944444	1				MEAN	0.488889	0.655556	0.622222	0.8	0.822222
	2	Farming: Medium pace of tech change in ag sector; entry barriers to ag markets reduced slowly	Continued demand for meat and dairy exports, but extra costs of production via climate disruption. Some demand for alternative energy sources including BECCS. Some direct emission costs and some incentive for ecosystem services delivery.	Irish farms maintain international position in upper quartile of technical and environmental efficiency.	Focus on efficient dairy systems maintains competitiveness in this key export sector.	Slower rate of productivity gain and abatement in this pathway, but also lower cost of production so that Irish farms remain reasonably competitive in terms of technical and environmental efficiency.	Innovation in protein value chains maintains Irish agri-food sector competitive advantage. Set up to exploit shift towards more sustainable diets.	Innovation in protein value chains maintains Irish agri-food sector competitive advantage. Set up to exploit shift towards more sustainable diets.		2	3	2	3	3
		Land use: Medium regulations lead to slow decline in the rate of deforestation		Continued tension between farming and national climate, biodiversity and air- and water-quality regulations. 7% reduction in HNV area.	Complies with split gas climate neutrality. Up to 1.3 million ha of "available" land, potentially increasing HNV land area by 51% vs 2020. However, dairy and dairy-beef production concentrated on 1.6 million ha intensively farmed land - local water quality risks.	Within climate neutrality constraint, extensive systems support biodiversity through a land-sharing approach. Afforestation with 50% broadleaf forests and low stocking densities lead to 3.2 million ha HNV land.	Within climate neutrality constraint, diversified land use creates opportunity to improve landscape-level biodiversity and avoid localised impacts - with appropriate regulation. Over 1 million ha available for other uses, and 51% more HNV land vs 2020.	Within climate neutrality constraint, diversified land use creates opportunity to improve landscape-level biodiversity and avoid localised impacts - with appropriate regulation. Not much available land, but HNV area up 41% vs 2020.		1	2	3	3	3
		Diet & food demand: Medium meat consumption		This pathway maintains high meat & milk exports to satisfy international demand (subject to climate impacts on production).	This pathway maintains high meat & milk exports to satisfy international demand (subject to climate impacts on production).	Much reduced exports owing to low production within climate neutrality constraint - 58% and 64% lower milk & beef production vs 2020. Farming not adapted to exploit demand for alternative proteins.	Moderate demand for alternative proteins, but overall protein production over 30% higher than 2020.	Moderate demand for alternative proteins, but overall protein production over 30% higher than 2020.		3	3	1	2	2
		Trade: Moderate		Always some risks of specific market access restrictions in major import markets for concentrated dairy and beef exports.	Always some risks of specific market access restrictions in major import markets for concentrated dairy and beef exports.	Always some risks of specific market access restrictions in major import markets for concentrated dairy and beef exports.	Diversification reduces specific trade risks	Diversification reduces specific trade risks		2	2	2	3	3
		Energy: Fossil fuels with some renewables		Not prepared to exploit demand for alternative feedtsocks - low land availability.	Land available for alternative (energy) production, but only biomethane to substitute 10% baseline natural gas demand realised in this pathway.	Only biomethane to substitute 10% baseline natural gas demand realised in this scenario. No additional land available for alternative (energy) production.	Some additional biomethane generation in grass-protein biorefineries, beyond the 10% baseline natural gas demand substituted by biomethane. Some additional land available for alternative energy generation, but not used in this pathway.	This pathway dramatically expands bioenergy, including BECCS, production to meet increasing demand for disptachable renewable energy and negative emissions.		2	2	2	2	3
		Climate impact: Moderate		Increased impacts of extended dry and/or wet periods limiting grass production and grazing days - reduces specific advantage of grazing-based production.	Increased impacts of extended dry and/or wet periods limiting grass production and grazing days - reduces specific advantage of grazing-based production.	Increased impacts of extended dry and/or wet periods limiting grass production and grazing days - reduces specific advantage of grazing-based production. Mitigated by less intensive grass exploitation (buffer capacity).	Grass and arable farming somewhat vulnerable to increase in extreme weather events. Diversification dilutesimpact of individual systems being badly affected in given years.	Grass and arable farming somewhat vulnerable to increase in extreme weather events. Diversification dilutesimpact of individual systems being badly affected in given years.		1	1	2	2	2		0.611111	0.722222	0.666667	0.833333	0.888889
	3	Farming: Low technology development, restricted trade	Restricted exports of milk & meat products, but high demand for more diverse indigenous food production. Demand for alternative indigenous energy sources, including bioenergy. Low direct emission costs and little incentive for ecosystem services delivery.	Irish farms remain competive in terms of production efficiency; but restricted trade collapses farm gate prices.	Irish farms remain competive in terms of production efficiency; but restricted trade collapses farm gate prices.	Irish farms remain competive in terms of production efficiency; but restricted trade reduces farm gate prices (less of an impact in this pathway because output already much lower than 2020 baseline).	Diversification of protein value chains supports local self-sufficiency.	Diversification of protein value chains supports local self-sufficiency.		1	1	2	2	2
		Land use: Hardly any regulation; continued deforestation due to competition over land and rapid expansion of agriculture		Abandonment of regulations results in strong competition for land (high land prices) and higher external damage costs (e.g. low water quality).	Complies with split gas climate neutrality. Large areas of spared land, but intensive dairy and dairy beef production creates external costs via poor water quality.	Not regulated, but this scenario naturally avoids some of the hotspots associated with a cattle dominated landscape.	Not regulated, but this scenario naturally avoids some of the hotspots associated with a cattle dominated landscape.	Not regulated, but this scenario naturally avoids some of the hotspots associated with a cattle dominated landscape.		2	2	3	3	3
		Diet & food demand: Medium meat consumption		Continued high demand for meat & dairy products in diet, but restricted access to overseas markets owing to trade barriers.	Continued high demand for meat & dairy products in diet, but restricted access to overseas markets owing to trade barriers.	Much reduced exports owing to low production within climate neutrality constraint - 58% and 64% lower milk & beef production vs 2020. Restricted access to export markets.	Moderate demand for alternative proteins, but restricted access to overseas markets owing to trade barriers.	Moderate demand for alternative proteins, but restricted access to overseas markets owing to trade barriers.		1	1	1	1	1
		Trade: Limited		Major challenge for export-oriented beef and milk production	Major challenge for export-oriented beef and milk production	Major challenge for export-oriented beef and milk production	Major challenge for export-oriented protein sector (diversiifcation offsers some risk mitigation)	Increased focus on self-sufficiency in land-based energy, materials and diversification of protein helps mitigate risk arising from reduced trade.		1	1	1	2	2
		Energy: Domestic energy focus		Not prepared to exploit demand for alternative feedtsocks - low land availability.	Land available for alternative (energy) production, but only biomethane to substitute 10% baseline natural gas demand realised in this pathway.	Only biomethane to substitute 10% baseline natural gas demand realised in this scenario. No additional land available for alternative (energy) production.	Some additional biomethane generation in grass-protein biorefineries, beyond the 10% baseline natural gas demand substituted by biomethane. Some additional land available for alternative energy generation, but not used in this pathway.	This pathway dramatically expands bioenergy, including BECCS, production to meet increasing demand for disptachable renewable energy and negative emissions.		1	2	2	2	3
		Climate impact: Moderate		Increased impacts of extended dry and/or wet periods limiting grass production and grazing days - reduces specific advantage of grazing-based production.	Increased impacts of extended dry and/or wet periods limiting grass production and grazing days - reduces specific advantage of grazing-based production.	Increased impacts of extended dry and/or wet periods limiting grass production and grazing days - reduces specific advantage of grazing-based production. Mitigated by less intensive grass exploitation (buffer capacity).	Grass and arable farming somewhat vulnerable to increase in extreme weather events. Diversification dilutesimpact of individual systems being badly affected in given years.	Grass and arable farming somewhat vulnerable to increase in extreme weather events. Diversification dilutesimpact of individual systems being badly affected in given years.		1	1	2	2	2		0.388889	0.444444	0.611111	0.666667	0.722222
	4	Farming: Ag productivity high for large scale industrial farming, low for small-scale farming	Continued demand for meat and dairy exports, but extra costs of production via climate disruption. Some demand for alternative energy sources including BECCS. Low direct emission costs but high incentives for local ecosystem services delivery.	Part-time beef farming falls behind on technical and environmental efficiency of front-runner systems globally.	Focus on efficient dairy systems maintains competitiveness.	Part-time beef farming and extensive farming approaches fall behind on technical efficiency of front-runner systems globally.	Innovation in protein value chains maintains Irish agri-food sector competitive advantage. Set up to exploit shift towards more sustainable diets.	Innovation in protein value chains maintains Irish agri-food sector competitive advantage. Set up to exploit shift towards more sustainable diets.		1	3	1	3	3
		Land use: Highly regulated in mid- and high income countries, largely unmanaged in low-income countries leading to tropical deforestation		Farming falls further behind regulatory requirements; potentially very high compliance costs at farm and national scale (e.g. via purchase of credits for EU ESR compliance). 7% reduction in HNV land.	Complies with split gas climate neutrality. Up to 1.3 million ha of "available" land, potentially increasing HNV land area by 51% vs 2020. However, dairy and dairy-beef production concentrated on 1.6 million ha intensively farmed land - local water quality risks.	Within climate neutrality constraint, extensive systems support biodiversity through a land-sharing approach. Afforestation with 50% broadleaf forests and low stocking densities lead to 3.2 million ha HNV land.	Within climate neutrality constraint, diversified land use creates opportunity to improve landscape-level biodiversity and avoid localised impacts - with appropriate regulation. Over 1 million ha available for other uses, and 51% more HNV land vs 2020.	Within climate neutrality constraint, diversified land use creates opportunity to improve landscape-level biodiversity and avoid localised impacts - with appropriate regulation. Not much available land, but HNV area up 41% vs 2020.		1	2	3	3	3
		Diet & food demand: Medium meat consumption (highly variable by income)		Continued high demand for meat & dairy exports, but production faces large downside risks owing to extreme climate change.	Continued high demand for meat & dairy exports, but production faces large downside risks owing to extreme climate change.	Much reduced exports owing to low production within climate neutrality constraint - 58% and 64% lower milk & beef production vs 2020. Farming not adapted to exploit demand for alternative proteins.	Moderate demand for alternative proteins.	Moderate demand for alternative proteins.		2	2	1	2	2
		Trade: Moderate		Always some risks of specific market access restrictions in major import markets for milk and beef. Constrained production for export due to extreme climate change.	Always some risks of specific market access restrictions in major import markets for milk and beef. Constrained production for export due to extreme climate change.	Always some risks of specific market access restrictions in major import markets for milk and beef. Constrained production for export due to extreme climate change.	Diversification reduces specific trade risks	Diversification reduces specific trade risks		2	2	2	3	3
		Energy: Diversified		Not prepared to exploit demand for alternative feedtsocks - low land availability.	Land available for alternative (energy) production, but only biomethane to substitute 10% baseline natural gas demand realised in this pathway.	Only biomethane to substitute 10% baseline natural gas demand realised in this scenario. No additional land available for alternative (energy) production.	Some additional biomethane generation in grass-protein biorefineries, beyond the 10% baseline natural gas demand substituted by biomethane. Some additional land available for alternative energy generation, but not used in this pathway.	This pathway dramatically expands bioenergy, including BECCS, production to meet increasing demand for disptachable renewable energy and negative emissions.		1	2	2	2	3
		Climate impact: High		Risks of extreme climate disruption, including droughts and flooding near term, and complete climate shift following collapse of Atlantic Meridional Overturning Circulation mid century onwards.	Risks of extreme climate disruption, including droughts and flooding near term, and complete climate shift following collapse of Atlantic Meridional Overturning Circulation mid century onwards.	Risks of extreme climate disruption, including droughts and flooding near term, and complete climate shift following collapse of Atlantic Meridional Overturning Circulation mid century onwards.	Risks of extreme climate disruption, including droughts and flooding near term, and complete climate shift following collapse of Atlantic Meridional Overturning Circulation mid century onwards.	Risks of extreme climate disruption, including droughts and flooding near term, and complete climate shift following collapse of Atlantic Meridional Overturning Circulation mid century onwards.		1	1	1	1	1		0.444444	0.666667	0.555556	0.777778	0.833333
	5	Farming: Highly managed, resource-intensive; rapid increase in productivity	Continued demand for meat and dairy exports, but reduced feasibility of grazing-based production owing to extreme climate disruption and challenging competition with high-tech indoor livestock systems. Limited demand for alternative proteins or alternative energy sources. Low direct emission costs and little incentive for ecosystem services delivery.	Part-time beef farming falls behind on technical and environmental efficiency of front-runner systems globally.	Focus on efficient dairy systems maintains competitiveness.	Part-time beef farming and extensive farming approaches fall behind on technical efficiency of front-runner systems globally.	Innovation in protein value chains maintains Irish agri-food sector competitive advantage. Set up to exploit shift towards more sustainable diets.	Innovation in protein value chains maintains Irish agri-food sector competitive advantage. Set up to exploit shift towards more sustainable diets.		1	3	1	3	3
		Land use: Medium regulations lead to slow decline in the rate of deforestation		Continued tension between farming and national climate, biodiversity and air- and water-quality regulations. 7% reduction in HNV area.	Complies with split gas climate neutrality. Up to 1.3 million ha of "available" land, potentially increasing HNV land area by 51% vs 2020. However, dairy and dairy-beef production concentrated on 1.6 million ha intensively farmed land - local water quality risks.	Within climate neutrality constraint, extensive systems support biodiversity through a land-sharing approach. Afforestation with 50% broadleaf forests and low stocking densities lead to 3.2 million ha HNV land.	Within climate neutrality constraint, diversified land use creates opportunity to improve landscape-level biodiversity and avoid localised impacts - with appropriate regulation. Over 1 million ha available for other uses, and 51% more HNV land vs 2020.	Within climate neutrality constraint, diversified land use creates opportunity to improve landscape-level biodiversity and avoid localised impacts - with appropriate regulation. Not much available land, but HNV area up 41% vs 2020.		1	2	3	3	3
		Diet & food demand: High meat consumption		High demand for meat & milk exports, but but production faces large downside risks owing to extreme climate change.	High demand for meat & milk exports, but but production faces large downside risks owing to extreme climate change.	Much reduced exports owing to low production within climate neutrality constraint - 58% and 64% lower milk & beef production vs 2020. Farming not adapted to exploit demand for alternative proteins.	Moderate demand for alternative proteins.	Moderate demand for alternative proteins.		2	2	1	2	2
		Trade: High (regional specialisation)		Low trade barriers, but constrained food production for export.	Low trade barriers, but constrained food production for export.	Low trade barriers, but constrained food production for export.	Low trade barriers, but constrained food production for export.	Low trade barriers, but constrained food production for export.		2	2	2	2	2
		Energy: Fossil fuel dominated		No need for land for alternative energy sources.	No need for land for alternative energy sources.	No need for land for alternative energy sources.	No need for land for alternative energy sources.	Low demand for renewable energy (low profitablity for this pathway)		3	3	3	3	1
		Climate impact: High		Risks of extreme climate disruption, including droughts and flooding near term, and complete climate shift following collapse of Atlantic Meridional Overturning Circulation mid century onwards.	Risks of extreme climate disruption, including droughts and flooding near term, and complete climate shift following collapse of Atlantic Meridional Overturning Circulation mid century onwards.	Risks of extreme climate disruption, including droughts and flooding near term, and complete climate shift following collapse of Atlantic Meridional Overturning Circulation mid century onwards.	Risks of extreme climate disruption, including droughts and flooding near term, and complete climate shift following collapse of Atlantic Meridional Overturning Circulation mid century onwards.	Risks of extreme climate disruption, including droughts and flooding near term, and complete climate shift following collapse of Atlantic Meridional Overturning Circulation mid century onwards.		1	1	1	1	1		0.555556	0.722222	0.611111	0.777778	0.666667
										44	59	56	72	74
										90	90	90	90	90
										0.488889	0.655556	0.622222	0.8	0.822222

## Sheet: Table S2
Table S2. Summary of output volumes and simple estimates of gross output values at 2025 prices for the main products from Ireland's AFOLU sector in 2020, and in 2050 under Business as Usual and the four studied transition pathways.
	Milk	Beef	Sheep meat	Pig meat	Poultry meat	General crops	Protein crops	Grass for protein	Bioenergy	Wood from forests	Willow	Concentrate feed	Fertiliser-N	GHG exceedance	High Nature Value land
	tonnes	tonnes	tonnes	tonnes	tonnes	tonnes	tonnes	tonnes	TWh	million m3	tonnes dry matter	tonnes	tonnes	Mt	million ha
Baseline 2020	8498952	795363	57328.7	358000	170000	Constant	0	0	6.5	3.9		4379000	379519	NA	1.54244
Business as Usual	9886536	703124	57328.7	358000	170000	Constant	0	0	14.9	6.55083		4.54098e+06	432412	10722950	1.42794
Bovine Protein	1.12331e+07	435590	57328.7	358000	170000	Constant	0	0	14.5	6.40718		3.78814e+06	227711	0	2.33006
Cattle+Nature	3577365	286175	57328.7	358000	170000	Constant	0	0	14.5	5.96781		2.64394e+06	75395.8	0	3.19453
Protein Diversification	7.10053e+06	356640	57328.7	429600	204000	Constant	815217	4.16667e+06	14.5	6.40718		3.66018e+06	145524	0	2.32961
Bioeconomy	1.08119e+07	419256	57328.7	358000	170000	Constant	815217	4.16667e+06	32.1	6.40718	3.52e+06	3.70103e+06	219172	0	2.16715
Price (€ / unit)	443.333	5750	7003.67	2096.67	1400	NA	250	50	55000000	50	100	350	1500	250
	€ billion per annum
Baseline 2020	3.76787	4.57334	0.401511	0.750607	0.238	2.15	0	0	0.3575	0.195	12.4338	1.53265	0.569279	NA	10.3319
Business as Usual	4.38303	4.04296	0.401511	0.750607	0.238	2.15	0	0	0.8195	0.327541	13.1132	1.58934	0.648619	2.68074	8.19445
Bovine Protein	4.98002	2.50464	0.401511	0.750607	0.238	2.15	0	0	0.7975	0.320359	12.1426	1.32585	0.341567	0	10.4752
Cattle+Nature	1.58597	1.64551	0.401511	0.750607	0.238	2.15	0	0	0.7975	0.29839	7.86748	0.925378	0.113094	0	6.82901
Protein Diversification	3.1479	2.05068	0.401511	0.900728	0.2856	2.15	0.203804	0.208333	0.7975	0.320359	10.4664	1.28106	0.218287	0	8.96707
Bioeconomy	4.79327	2.41072	0.401511	0.750607	0.238	2.15	0.203804	0.208333	1.7655	0.320359	13.2421	1.29536	0.328758	0	11.618
Meat price	https://www.bordbia.ie/farmers-growers/prices-markets/
Milk price	https://www.clal.it/en/index.php?section=stat_irlanda
Poultry price	https://www.ifa.ie/markets-and-prices/poultry-council-report-february-2024/
Peas & grass protein	https://agridata.ec.europa.eu/extensions/DataPortal/prices.html
Sawlogs	https://www.farmersjournal.ie/more/forestry/log-prices-stable-for-first-half-of-year-836993
Nat gas	https://www.utilityfair.ie/business-energy-insights/wholesale-gas-prices-in-ireland
Aggregate input output values	https://www.cso.ie/en/releasesandpublications/ep/p-oiiaf/outputinputandincomeinagriculture-finalestimate2024/

## Sheet: Table S3
Table S3. Summary of key characteristics for Ireland's AFOLU sector in 2020, and in 2050 for Business as Usual (BAU) and the four alternative transition pathways (Sustainable Intensification - SI, Cattle + Nature - CN, Diversified Protein - DP, and Bioeconomy - BE)
	Areas															Environmental impacts			Outputs						Input
Scenario	Dairy area	Beef area	Sheep area	Biogas grass-clover	Biorefinery grass-clover	Willow	Tillage crop area	Drained organic soil	Rewetted organic soil1	Drained wetland area	Restored/rehabilitated wetland area	Forest area	“Available”			Ammonia	N to water	P to water	Protien total	Wood harvest million m3	Total Bioenergy	AD bioenergy	Forest bioenergy	Willow bioenergy	Concentrate feed
	1000 ha															kt				Million m3	TWh energy				kt
2020	999	2203	834	0	0	0	350	141	198	125	84.5	781	0		2020	105.63	142.168	5.72742	626.729	3.91	6.5	0	9.2	0	4378.8
BAU	1140.98	2007.98	828	130	0	0	350	141	198	62	147.5	841	-130.962		BAU	111.355	149.371	6.04623	654.079	6.55083	9.2	0	9.2	0	4540.98
SI	1359.46	1599.28	828	130	0	0	350	71	268	12	197.5	989	-89		SI	127.123	153.044	7.56005	899.729	5.84096	14.4	5.7	8.7	0	5202.38
SI_NZ	76.8393	54.3489	828	130	0	0	350	15	324	12	197.5	1361	2367		SI_NZ	12.0315	36.6135	0.35266	186.416	6.21806	14.7	5.7	9	0	1654.01
SI_SG	945.714	668.91	828	130	0	0	350	71	268	12	197.5	1155	1089		SI_SG	73.3516	99.1547	4.3404	639.677	6.40718	14.5	5.7	8.8	0	3788.14
CN	825.708	1756.18	828	130	0	0	350	15	324	12	197.5	989	288.115		CN	49.9437	82.7391	2.40596	337.36	5.82826	14.4	5.7	8.7	0	2643.94
CN_NZ	0	0	214	130	0	0	350	15	324	12	197.5	1361	3112		CN_NZ	4.22272	19.1029	1.02624e-06	135.701	6.0463	14.6	5.7	8.9	0	1465.28
CN_SG	825.708	1756.18	828	130	0	0	350	71	268	12	197.5	1155	122.115		CN_SG	49.9437	82.7391	2.40596	337.36	5.96781	14.5	5.7	8.8	0	2643.94
DP	1359.46	1062.15	828	130	180	0	450	15	324	12	197.5	989	168.383		DP	104.866	137.117	6.23933	1053.08	5.84096	14.4	5.7	8.7	0	5097.45
DP_NZ	29.5536	23.0903	828	130	180	0	450	15	324	12	197.5	1361	2165.36		DP_NZ	10.4501	39.4897	0.135641	485.348	6.21806	14.7	5.7	9	0	1830.92
DP_SG	774.303	604.965	828	130	180	0	450	71	268	12	197.5	1155	1044.73		DP_SG	63.3229	94.161	3.55371	803.278	6.40718	14.5	5.7	8.8	0	3660.18
BE	1032.14	924.925	828	130	180	400	450	15	324	12	197.5	989	232.939		BE	76.1048	110.002	4.18572	862.668	5.84096	32	5.7	8.7	17.6	3860.73
BE_NZ	271.893	212.431	828	130	180	400	450	15	324	12	197.5	1361	1333.68		BE_NZ	27.6547	57.2796	1.24787	588.169	6.21806	32.3	5.7	9	17.6	2133.1
BE_SG	910.25	711.18	828	130	180	400	450	71	268	12	197.5	1155	402.57		BE_SG	72.9743	104.141	4.17764	921.177	6.40718	32.1	5.7	8.8	17.6	3701.03
	Dairy	Beef	Sheep	Bio-crops	Tillage crop area	Drained organic soil	Rewetted soil	Drained wetland	Restored wetland	Near natural wetland	Forest	“Available” land			HNV land
2020	999	2203	834	0	350	141	198	125	84.5	884	781	0			1542.44	33% forests broadleaf
BAU	1140.98	2007.98	828	0	350	141	198	62	147.5	884	841	-130.962			1427.94	33% farmland HNV (assume 0% dairy but 100% cattle area in scenario 3)
SI_SG	945.714	668.91	828	130	350	71	268	12	197.5	884	1155	1089			2174.24
CN_SG	825.708	1756.18	828	130	350	71	268	12	197.5	884	1155	122.115			3194.53
DP_SG	774.303	604.965	828	310	450	71	268	12	197.5	884	1155	1044.73			2329.61
BE_SG	910.25	711.18	828	710	450	71	268	12	197.5	884	1155	402.57			2167.15	Includes willow
																							#NAME?
																								Total protein	Milk protein	Beef protein	Wood 2050	Wood 2100	Bioenergy	HNV land	UAA	GHGs	Ammonia	N to water	P to water	Feed
																							Business as usual	1.10819	1.16327	0.884028	1.6754	1.4399	1.41538	0.925769	0.987505	1.03065	1.0542	1.05067	1.05566	1.03704
																							Sustainable intensification	1.02066	1.32171	0.547662	1.63867	2.57289	2.23077	1.51063	0.690291	0.443422	0.69442	0.69745	0.757829	0.86511
																							Cattle plus nature	0.538287	0.420918	0.359805	1.52629	1.82353	2.23077	2.07109	0.895002	0.390905	0.472817	0.581983	0.420078	0.603805
																							Protein diversification	1.2817	0.835459	0.448398	1.63867	2.57289	2.23077	1.51034	0.699739	0.407079	0.599478	0.662324	0.620472	0.835887
																							Bioeconomy	1.46982	1.27214	0.527125	1.63867	2.57289	4.93846	1.40501	0.835647	0.336233	0.690848	0.73252	0.72941	0.845217

## Sheet: S1-BAU
AFOLU emissions time series for BAU
Units: kt per annuam
Year																									Sc-1
	Agriculture				Forest-old	Afforestation	Other land use				AD-Ag				AD-subtitutions				Wood-substitutions	LUC					AGGREGATION						AG		LULUCF			AGRICULTURE				LULUCF
	CO2	CH4	N2O	CO2e	CO2e	CO2e	CO2	CH4	N2O	CO2e	CO2	CH4	N2O	CO2e	CO2	CH4	N2O	CO2e	CO2e	CO2e	HWP	CCS-wood	CCS-AD		CO2	CH4	N2O	CO2e			CO2	CO2e	CO2	CO2e		CO2	CH4	N2O		CO2 ex BECCS	CO2 inc. BECCS	CH4	N2O					Agriculture	LULUCF
2020	515.052	519.844	27.5299	22366.1	-2082.32	0	3890	130	0.029	7537.69										0	-809.02				1513.71	649.844	27.5589	27012.5			515.052	22366.1	998.658	4646.34		515.052	519.844	27.5299		998.658	998.658	130	0.029					22366.1	4646.34
2021	515.052	519.844	27.5299	22366.1	-1440.38	0	2745	134	0.029	6504.69										0	-963				856.672	653.844	27.5589	26467.4			515.052	22366.1	341.62	4101.31		515.052	519.844	27.5299		341.62	341.62	134	0.029					22366.1	4101.31
2022	515.052	519.844	27.5299	22366.1	-1879	0	1934	139	0.029	5813										0	-866				-295.948	658.844	27.5589	25434.1			515.052	22366.1	-811	3068		515.052	519.844	27.5299		-811	-811	139	0.029					22366.1	3088.68
2023	515.335	521.873	27.3624	22378.8	1080.78	0	1959.5	139.179	0.0279643	5580.83										0	-1985.5				1570.12	661.051	27.3904	27054.9			515.335	22378.8	1054.78	4676.12		515.335	521.873	27.3624		1054.78	1054.78	139.179	0.0279643					22378.8	4959.19
2024	515.619	523.901	27.195	22391.5	-1157.5	-1.35465	1985	139.357	0.0269286	5348.66									-3602.33	0	-1235.56				106.203	663.258	27.2219	25345.8			515.619	22391.5	-409.416	2954.25		515.619	523.901	27.195		-409.416	-409.416	139.357	0.0269286					22391.5	3499.72
2025	515.903	525.93	27.0275	22404.2	800.055	-5.80342	2010.5	139.536	0.0258929	5116.49									-4903.99	0	-2145.47				1175.18	665.465	27.0534	26169.5			515.903	22404.2	659.278	3765.27		515.903	525.93	27.0275		659.278	659.278	139.536	0.0258929					22404.2	4573.14
2026	516.186	527.958	26.86	22416.9	415.773	-13.4432	2036	139.714	0.0248571	4884.33									-4332.58	0	-1662.7				1291.82	667.672	26.8848	26040.9			516.186	22416.9	775.635	3623.96		516.186	527.958	26.86		775.635	775.635	139.714	0.0248571					22416.9	4694.22
2027	516.47	529.987	26.6925	22429.6	320.294	-24.322	2061.5	139.893	0.0238214	4652.16									-4298.84	0	-1679.65				1194.29	669.88	26.7163	25698.1			516.47	22429.6	677.823	3268.48		516.47	529.987	26.6925		677.823	677.823	139.893	0.0238214					22429.6	4601.14
2028	516.754	532.015	26.525	22442.3	615.799	-38.4372	2087	140.071	0.0227857	4419.99									-4245.79	0	-1592.62				1588.5	672.087	26.5478	25847			516.754	22442.3	1071.74	3404.73		516.754	532.015	26.525		1071.74	1071.74	140.071	0.0227857					22442.3	4999.78
2029	517.038	534.044	26.3575	22455	927.138	-55.7414	2112.5	140.25	0.02175	4187.82									-4609.43	0	-1796.93				1704.01	674.294	26.3793	25717.3			517.038	22455	1186.97	3262.29		517.038	534.044	26.3575		1186.97	1186.97	140.25	0.02175					22455	5119.73
2030	517.321	536.072	26.1901	22467.7	1691.52	-76.1486	2138	140.429	0.0207143	5216									-5570.51	590	-1956.5				2904.2	676.501	26.2108	27932.6			517.321	22467.7	2386.88	5464.88		517.321	536.072	26.1901		1796.88	1796.88	140.429	0.0207143					22467.7	5734.37
2031	517.605	538.101	26.0226	22480.4	2843.65	-99.5392	2163.5	140.607	0.0196786	5289.55									-5429.12	590	-1811.06				4204.15	678.708	26.0423	29293			517.605	22480.4	3686.55	6812.6		517.605	538.101	26.0226		3096.55	3096.55	140.607	0.0196786					22480.4	7038.76
2032	517.889	540.129	25.8551	22493.1	3437.85	-125.766	2189	140.786	0.0186429	5363.1									-5223.75	590	-1634.58				4974.39	680.915	25.8737	30123.7			517.889	22493.1	4456.51	7630.61		517.889	540.129	25.8551		3866.51	3866.51	140.786	0.0186429					22493.1	7813.45
2033	518.172	542.158	25.6876	22505.8	3515.02	-154.661	2214.5	140.964	0.0176071	5436.65									-5708.2	590	-1899.98				4783.05	683.122	25.7052	29992.8			518.172	22505.8	4264.88	7487.03		518.172	542.158	25.6876		3674.88	3674.88	140.964	0.0176071					22505.8	7626.55
2034	518.456	544.186	25.5201	22518.5	5726.2	-186.038	2240	141.143	0.0165714	5510.2									-6468.54	590	-2314.34				6574.28	685.329	25.5367	31844.5			518.456	22518.5	6055.82	9326.02		518.456	544.186	25.5201		5465.82	5465.82	141.143	0.0165714					22518.5	9422.21
2035	518.74	546.215	25.3526	22531.2	4854.33	-219.881	2265.5	141.321	0.0155357	5583.75									-5777.18	590	-1811.88				6196.81	687.536	25.3682	31527.5			518.74	22531.2	5678.07	8996.32		518.74	546.215	25.3526		5088.07	5088.07	141.321	0.0155357					22531.2	9049.19
2036	519.023	548.243	25.1852	22543.9	4809.23	-253.377	2291	141.5	0.0145	5657.3									-5688.34	590	-1778.7				6177.17	689.743	25.1997	31568.4			519.023	22543.9	5658.15	9024.45		519.023	548.243	25.1852		5068.15	5068.15	141.5	0.0145					22543.9	9033.99
2037	519.307	550.272	25.0177	22556.6	5262.7	-286.038	2316.5	141.679	0.0134643	5730.85									-5826.9	590	-1919.96				6482.51	691.95	25.0311	31934.2			519.307	22556.6	5963.2	9377.55		519.307	550.272	25.0177		5373.2	5373.2	141.679	0.0134643					22556.6	9343.77
2038	519.591	552.3	24.8502	22569.3	4646.11	-327.292	2342	141.857	0.0124286	5804.4									-5141.96	590	-1539.54				6230.86	694.158	24.8626	31743			519.591	22569.3	5711.27	9173.67		519.591	552.3	24.8502		5121.27	5121.27	141.857	0.0124286					22569.3	9096.57
2039	519.875	554.329	24.6827	22582	4116.6	-353.992	2367.5	142.036	0.0113929	5877.95									-4952.09	590	-1530.67				5709.31	696.365	24.6941	31281.9			519.875	22582	5189.44	8699.89		519.875	554.329	24.6827		4599.44	4599.44	142.036	0.0113929					22582	8579.45
2040	520.158	556.357	24.5152	22594.7	2370.95	-387.528	2393	142.214	0.0103571	5951.5									-4219.57	590	-1086.51				4400.07	698.572	24.5256	30033.1			520.158	22594.7	3879.91	7438.41		520.158	556.357	24.5152		3289.91	3289.91	142.214	0.0103571					22594.7	7274.65
2041	520.442	558.386	24.3478	22607.4	3673.08	-423.45	2418.5	142.393	0.00932143	6025.05									-5332.26	590	-2097.26				4681.31	700.779	24.3571	30374.8			520.442	22607.4	4160.87	7767.42		520.442	558.386	24.3478		3570.87	3570.87	142.393	0.00932143					22607.4	7560.34
2042	520.726	560.414	24.1803	22620.1	2475.5	-460.546	2444	142.571	0.00828571	6098.6									-4484.7	590	-1483.51				4086.17	702.986	24.1886	29840.1			520.726	22620.1	3565.44	7220.04		520.726	560.414	24.1803		2975.44	2975.44	142.571	0.00828571					22620.1	6969.64
2043	521.009	562.443	24.0128	22632.8	1833.91	-483.462	2469.5	142.75	0.00725	6172.15									-3982.4	590	-1189.09				3741.87	705.193	24.02	29556.3			521.009	22632.8	3220.86	6923.51		521.009	562.443	24.0128		2630.86	2630.86	142.75	0.00725					22632.8	6629.78
2044	521.293	564.472	23.8453	22645.5	1876.93	-509.489	2495	142.929	0.00621429	6245.7									-3734.2	590	-1101.74				3871.99	707.4	23.8515	29746.9			521.293	22645.5	3350.7	7101.4		521.293	564.472	23.8453		2760.7	2760.7	142.929	0.00621429					22645.5	6764.35
2045	521.577	566.5	23.6778	22658.2	1691.82	-539.556	2520.5	143.107	0.00517857	6319.25									-3409.43	590	-894.838				3889.5	709.607	23.683	29824.9			521.577	22658.2	3367.93	7166.68		521.577	566.5	23.6778		2777.93	2777.93	143.107	0.00517857					22658.2	6786.3
2046	521.86	568.529	23.5103	22670.9	1582.75	-573.437	2546	143.286	0.00414286	6392.8									-3269.92	590	-873.905				3793.27	711.814	23.5145	29789.1			521.86	22670.9	3271.41	7118.21		521.86	568.529	23.5103		2681.41	2681.41	143.286	0.00414286					22670.9	6694.5
2047	522.144	570.557	23.3429	22683.6	1573.34	-600.234	2571.5	143.464	0.00310714	6466.35									-3509.83	590	-1299.65				3357.1	714.021	23.346	29413.4			522.144	22683.6	2834.95	6729.8		522.144	570.557	23.3429		2244.95	2244.95	143.464	0.00310714					22683.6	6262.78
2048	522.428	572.586	23.1754	22696.3	2046.14	-617.813	2597	143.643	0.00207143	6539.9									-3411.85	590	-1305.41				3832.34	716.228	23.1775	29949.1			522.428	22696.3	3309.92	7252.82		522.428	572.586	23.1754		2719.92	2719.92	143.643	0.00207143					22696.3	6742.46
2049	522.712	574.614	23.0079	22709	1406.12	-638.599	2622.5	143.821	0.00103571	6613.45									-3011.6	590	-970.614				3532.12	718.436	23.0089	29709.4			522.712	22709	3009.41	7000.36		522.712	574.614	23.0079		2419.41	2419.41	143.821	0.00103571					22709	6446.68
2050	522.995	576.643	22.8404	22721.7	2056.63	-663.135	2648	144	0	6687									-2938.85	0	-1071.75				3492.74	720.643	22.8404	29730.4			522.995	22721.7	2969.74	7008.74		522.995	576.643	22.8404		2969.74	2969.74	144	0					22721.7	7001.74
2051	522.995	576.643	22.8404	22721.7	1513.14	-482.21	2648	144	0	6687									-3121.96	0	-1438.19				2763.73	720.643	22.8404	29001.4			522.995	22721.7	2240.74	6279.74		522.995	576.643	22.8404		2240.74	2240.74	144	0					22721.7	6272.74
2052	522.995	576.643	22.8404	22721.7	136.204	-472.192	2648	144	0	6687									-2322.09	0	-629.354				2205.65	720.643	22.8404	28443.4			522.995	22721.7	1682.66	5721.66		522.995	576.643	22.8404		1682.66	1682.66	144	0					22721.7	5714.66
2053	522.995	576.643	22.8404	22721.7	110.359	-464.141	2648	144	0	6687									-2196.29	0	-663.388				2153.82	720.643	22.8404	28391.5			522.995	22721.7	1630.83	5669.83		522.995	576.643	22.8404		1630.83	1630.83	144	0					22721.7	5662.83
2054	522.995	576.643	22.8404	22721.7	-53.9678	-464.174	2648	144	0	6687									-2035.48	0	-605.317				2047.54	720.643	22.8404	28285.2			522.995	22721.7	1524.54	5563.54		522.995	576.643	22.8404		1524.54	1524.54	144	0					22721.7	5556.54
2055	522.995	576.643	22.8404	22721.7	-36.9913	-470.602	2648	144	0	6687									-1882.94	0	-615.605				2047.8	720.643	22.8404	28285.5			522.995	22721.7	1524.8	5563.8		522.995	576.643	22.8404		1524.8	1524.8	144	0					22721.7	5556.8
2056	522.995	576.643	22.8404	22721.7	-509.107	-481.9	2648	144	0	6687									-1622.26	0	-378.95				1801.04	720.643	22.8404	28038.7			522.995	22721.7	1278.04	5317.04		522.995	576.643	22.8404		1278.04	1278.04	144	0					22721.7	5310.04
2057	522.995	576.643	22.8404	22721.7	-571.848	-497.231	2648	144	0	6687									-1479.76	0	-376.246				1725.67	720.643	22.8404	27963.4			522.995	22721.7	1202.68	5241.68		522.995	576.643	22.8404		1202.68	1202.68	144	0					22721.7	5234.68
2058	522.995	576.643	22.8404	22721.7	883.971	-510.803	2648	144	0	6687									-1668.25	0	-1107.56				2436.61	720.643	22.8404	28674.3			522.995	22721.7	1913.61	5952.61		522.995	576.643	22.8404		1913.61	1913.61	144	0					22721.7	5945.61
2059	522.995	576.643	22.8404	22721.7	934.149	-529.318	2648	144	0	6687									-1492.21	0	-1060.99				2514.83	720.643	22.8404	28752.5			522.995	22721.7	1991.84	6030.84		522.995	576.643	22.8404		1991.84	1991.84	144	0					22721.7	6023.84
2060	522.995	576.643	22.8404	22721.7	61.2125	-552.412	2648	144	0	6687									-1138.55	0	-511.239				2168.56	720.643	22.8404	28406.3			522.995	22721.7	1645.56	5684.56		522.995	576.643	22.8404		1645.56	1645.56	144	0					22721.7	5677.56
2061	522.995	576.643	22.8404	22721.7	66.3294	-558.59	2648	144	0	6687									-995.828	0	-557.73				2121	720.643	22.8404	28358.7			522.995	22721.7	1598.01	5637.01		522.995	576.643	22.8404		1598.01	1598.01	144	0					22721.7	5630.01
2062	522.995	576.643	22.8404	22721.7	-100.958	-462.944	2648	144	0	6687									-808.447	0	-485.001				2122.09	720.643	22.8404	28359.8			522.995	22721.7	1599.1	5638.1		522.995	576.643	22.8404		1599.1	1599.1	144	0					22721.7	5631.1
2063	522.995	576.643	22.8404	22721.7	-105.637	-462.315	2648	144	0	6687									-653.493	0	-473.965				2129.08	720.643	22.8404	28366.8			522.995	22721.7	1606.08	5645.08		522.995	576.643	22.8404		1606.08	1606.08	144	0					22721.7	5638.08
2064	522.995	576.643	22.8404	22721.7	-1048.41	-471.604	2648	144	0	6687									-424.457	0	62.3324				1713.32	720.643	22.8404	27951			522.995	22721.7	1190.32	5229.32		522.995	576.643	22.8404		1190.32	1190.32	144	0					22721.7	5222.32
2065	522.995	576.643	22.8404	22721.7	-436.163	-465.843	2648	144	0	6687									-496.104	0	-339.165				1929.82	720.643	22.8404	28167.5			522.995	22721.7	1406.83	5445.83		522.995	576.643	22.8404		1406.83	1406.83	144	0					22721.7	5438.83
2066	522.995	576.643	22.8404	22721.7	-806.42	-491.83	2648	144	0	6687									-457.521	0	-157.677				1715.07	720.643	22.8404	27952.8			522.995	22721.7	1192.07	5231.07		522.995	576.643	22.8404		1192.07	1192.07	144	0					22721.7	5224.07
2067	522.995	576.643	22.8404	22721.7	-575.472	-502.618	2648	144	0	6687									-476.844	0	-304.441				1788.46	720.643	22.8404	28026.2			522.995	22721.7	1265.47	5304.47		522.995	576.643	22.8404		1265.47	1265.47	144	0					22721.7	5297.47
2068	522.995	576.643	22.8404	22721.7	1617.07	-518.532	2648	144	0	6687									-679.618	0	-1502.39				2767.13	720.643	22.8404	29004.8			522.995	22721.7	2244.14	6283.14		522.995	576.643	22.8404		2244.14	2244.14	144	0					22721.7	6276.14
2069	522.995	576.643	22.8404	22721.7	876.26	-539.287	2648	144	0	6687									-585.673	0	-864.882				2643.09	720.643	22.8404	28880.8			522.995	22721.7	2120.09	6159.09		522.995	576.643	22.8404		2120.09	2120.09	144	0					22721.7	6152.09
2070	522.995	576.643	22.8404	22721.7	1933.32	-563.466	2648	144	0	6687									-672.651	0	-1378.32				3162.53	720.643	22.8404	29400.2			522.995	22721.7	2639.53	6678.53		522.995	576.643	22.8404		2639.53	2639.53	144	0					22721.7	6671.53
2071	522.995	576.643	22.8404	22721.7	484.012	-580.292	2648	144	0	6687									-549.364	0	-497.759				2576.96	720.643	22.8404	28814.7			522.995	22721.7	2053.96	6092.96		522.995	576.643	22.8404		2053.96	2053.96	144	0					22721.7	6085.96
2072	522.995	576.643	22.8404	22721.7	270.924	-598.36	2648	144	0	6687									-510.365	0	-375.457				2468.1	720.643	22.8404	28705.8			522.995	22721.7	1945.11	5984.11		522.995	576.643	22.8404		1945.11	1945.11	144	0					22721.7	5977.11
2073	522.995	576.643	22.8404	22721.7	79.6252	-594.006	2648	144	0	6687									-499.267	0	-277.634				2378.98	720.643	22.8404	28616.7			522.995	22721.7	1855.99	5894.99		522.995	576.643	22.8404		1855.99	1855.99	144	0					22721.7	5887.99
2074	522.995	576.643	22.8404	22721.7	1025.79	-615.048	2648	144	0	6687									-577.4	0	-751.041				2830.7	720.643	22.8404	29068.4			522.995	22721.7	2307.71	6346.71		522.995	576.643	22.8404		2307.71	2307.71	144	0					22721.7	6339.71
2075	522.995	576.643	22.8404	22721.7	1464.27	-630.905	2648	144	0	6687									-613.936	0	-1002.04				3002.31	720.643	22.8404	29240			522.995	22721.7	2479.32	6518.32		522.995	576.643	22.8404		2479.32	2479.32	144	0					22721.7	6511.32
2076	522.995	576.643	22.8404	22721.7	2516.45	-638.684	2648	144	0	6687									-689.979	0	-1427.34				3621.42	720.643	22.8404	29859.1			522.995	22721.7	3098.43	7137.43		522.995	576.643	22.8404		3098.43	3098.43	144	0					22721.7	7130.43
2077	522.995	576.643	22.8404	22721.7	2026.06	-652.002	2648	144	0	6687									-637.19	0	-1049.97				3495.08	720.643	22.8404	29732.8			522.995	22721.7	2972.09	7011.09		522.995	576.643	22.8404		2972.09	2972.09	144	0					22721.7	7004.09
2078	522.995	576.643	22.8404	22721.7	1623.44	-667.455	2648	144	0	6687									-608.299	0	-838.642				3288.34	720.643	22.8404	29526			522.995	22721.7	2765.35	6804.35		522.995	576.643	22.8404		2765.35	2765.35	144	0					22721.7	6797.35
2079	522.995	576.643	22.8404	22721.7	1606.69	-479.261	2648	144	0	6687									-617.011	0	-838.855				3459.57	720.643	22.8404	29697.3			522.995	22721.7	2936.57	6975.57		522.995	576.643	22.8404		2936.57	2936.57	144	0					22721.7	6968.57
2080	522.995	576.643	22.8404	22721.7	1995.18	-464.066	2648	144	0	6687									-651.981	0	-1061.08				3641.03	720.643	22.8404	29878.7			522.995	22721.7	3118.03	7157.03		522.995	576.643	22.8404		3118.03	3118.03	144	0					22721.7	7150.03
2081	522.995	576.643	22.8404	22721.7	2315.16	-452.705	2648	144	0	6687									-659.371	0	-1065.85				3967.6	720.643	22.8404	30205.3			522.995	22721.7	3444.6	7483.6		522.995	576.643	22.8404		3444.6	3444.6	144	0					22721.7	7476.6
2082	522.995	576.643	22.8404	22721.7	1719.59	-450.74	2648	144	0	6687									-602.579	0	-700.076				3739.76	720.643	22.8404	29977.5			522.995	22721.7	3216.77	7255.77		522.995	576.643	22.8404		3216.77	3216.77	144	0					22721.7	7248.77
2083	522.995	576.643	22.8404	22721.7	1254.2	-452.777	2648	144	0	6687									-568.921	0	-458.036				3514.38	720.643	22.8404	29752.1			522.995	22721.7	2991.38	7030.38		522.995	576.643	22.8404		2991.38	2991.38	144	0					22721.7	7023.38
2084	522.995	576.643	22.8404	22721.7	1037.95	-460.332	2648	144	0	6687									-545.23	0	-298.362				3450.25	720.643	22.8404	29688			522.995	22721.7	2927.26	6966.26		522.995	576.643	22.8404		2927.26	2927.26	144	0					22721.7	6959.26
2085	522.995	576.643	22.8404	22721.7	2719.41	-473.462	2648	144	0	6687									-699.971	0	-1289.29				4127.65	720.643	22.8404	30365.4			522.995	22721.7	3604.66	7643.66		522.995	576.643	22.8404		3604.66	3604.66	144	0					22721.7	7636.66
2086	522.995	576.643	22.8404	22721.7	2689.13	-486.731	2648	144	0	6687									-669.965	0	-1065.91				4307.48	720.643	22.8404	30545.2			522.995	22721.7	3784.48	7823.48		522.995	576.643	22.8404		3784.48	3784.48	144	0					22721.7	7816.48
2087	522.995	576.643	22.8404	22721.7	2354.86	-507.331	2648	144	0	6687									-631.09	0	-782.734				4235.79	720.643	22.8404	30473.5			522.995	22721.7	3712.8	7751.8		522.995	576.643	22.8404		3712.8	3712.8	144	0					22721.7	7744.8
2088	522.995	576.643	22.8404	22721.7	2073.92	-529.929	2648	144	0	6687									-604.288	0	-609.366				4105.62	720.643	22.8404	30343.3			522.995	22721.7	3582.63	7621.63		522.995	576.643	22.8404		3582.63	3582.63	144	0					22721.7	7614.63
2089	522.995	576.643	22.8404	22721.7	2274.41	-555.551	2648	144	0	6687									-634.402	0	-751.149				4138.71	720.643	22.8404	30376.4			522.995	22721.7	3615.71	7654.71		522.995	576.643	22.8404		3615.71	3615.71	144	0					22721.7	7647.71
2090	522.995	576.643	22.8404	22721.7	1894.34	-583.85	2648	144	0	6687									-594.343	0	-507.554				3973.93	720.643	22.8404	30211.6			522.995	22721.7	3450.94	7489.94		522.995	576.643	22.8404		3450.94	3450.94	144	0					22721.7	7482.94
2091	522.995	576.643	22.8404	22721.7	1781.78	-586.243	2648	144	0	6687									-578.35	0	-412.532				3954	720.643	22.8404	30191.7			522.995	22721.7	3431	7470		522.995	576.643	22.8404		3431	3431	144	0					22721.7	7463
2092	522.995	576.643	22.8404	22721.7	2635.08	-609.91	2648	144	0	6687									-653.772	0	-832.263				4363.9	720.643	22.8404	30601.6			522.995	22721.7	3840.91	7879.91		522.995	576.643	22.8404		3840.91	3840.91	144	0					22721.7	7872.91
2093	522.995	576.643	22.8404	22721.7	2913.93	-633.967	2648	144	0	6687									-675.248	0	-944.031				4506.92	720.643	22.8404	30744.6			522.995	22721.7	3983.93	8022.93		522.995	576.643	22.8404		3983.93	3983.93	144	0					22721.7	8015.93
2094	522.995	576.643	22.8404	22721.7	2061.28	-671.759	2648	144	0	6687									-582.511	0	-400.968				4159.55	720.643	22.8404	30397.3			522.995	22721.7	3636.55	7675.55		522.995	576.643	22.8404		3636.55	3636.55	144	0					22721.7	7668.55
2095	522.995	576.643	22.8404	22721.7	2160.7	-692.253	2648	144	0	6687									-593.731	0	-443.664				4195.78	720.643	22.8404	30433.5			522.995	22721.7	3672.78	7711.78		522.995	576.643	22.8404		3672.78	3672.78	144	0					22721.7	7704.78
2096	522.995	576.643	22.8404	22721.7	2675.25	-714.521	2648	144	0	6687									-645.583	0	-755.098				4376.63	720.643	22.8404	30614.3			522.995	22721.7	3853.63	7892.63		522.995	576.643	22.8404		3853.63	3853.63	144	0					22721.7	7885.63
2097	522.995	576.643	22.8404	22721.7	2760.52	-740.777	2648	144	0	6687									-643.53	0	-726.469				4464.27	720.643	22.8404	30702			522.995	22721.7	3941.28	7980.28		522.995	576.643	22.8404		3941.28	3941.28	144	0					22721.7	7973.28
2098	522.995	576.643	22.8404	22721.7	2754.64	-769.111	2648	144	0	6687									-636.03	0	-683.708				4472.82	720.643	22.8404	30710.5			522.995	22721.7	3949.82	7988.82		522.995	576.643	22.8404		3949.82	3949.82	144	0					22721.7	7981.82
2099	522.995	576.643	22.8404	22721.7	1454.26	-768.981	2648	144	0	6687									-523.145	0	49.7739				3906.04	720.643	22.8404	30143.7			522.995	22721.7	3383.05	7422.05		522.995	576.643	22.8404		3383.05	3383.05	144	0					22721.7	7415.05
2100	522.995	576.643	22.8404	22721.7	663.604	-786.431	2648	144	0	6687									-438.764	0	577.571				3625.74	720.643	22.8404	29863.4			522.995	22721.7	3102.74	7141.74		522.995	576.643	22.8404		3102.74	3102.74	144	0					22721.7	7134.74
[truncated: 8 more columns]

## Sheet: S2a-SI
AFOLU emissions time series for SI with no climate neutrality constraint
Units: kt per annuam
Year																									Sc-2a
	Agriculture				Forest-old	Afforestation	Other land use				AD-Ag				AD-subtitutions				Wood-substitutions	LUC					AGGREGATION						AG		LULUCF			AGRICULTURE				LULUCF
	CO2	CH4	N2O	CO2e	CO2e	CO2e	CO2	CH4	N2O	CO2e	CO2	CH4	N2O	CO2e	CO2	CH4	N2O	CO2e	CO2e	CO2e	HWP	CCS-wood	CCS-AD		CO2	CH4	N2O	CO2e			CO2	CO2e	CO2	CO2e		CO2	CH4	N2O		CO2 ex BECCS	CO2 inc. BECCS	CH4	N2O
2020	515.052	519.844	27.5299	22366.1	-2082.32	0	3890	130	0.029	7537.69		0	0	0	0	0	0	0		0	-809.02				1513.71	649.844	27.5589	27012.5			515.052	22366.1	998.658	4646.34		515.052	519.844	27.5299		998.658	998.658	130	0.029
2021	515.052	519.844	27.5299	22366.1	-1440.38	0	2745	134	0.029	6504.69		0	0	0	0	0	0	0		0	-963				856.672	653.844	27.5589	26467.4			515.052	22366.1	341.62	4101.31		515.052	519.844	27.5299		341.62	341.62	134	0.029
2022	515.052	519.844	27.5299	22366.1	-1879	0	1934	139	0.029	5813		0	0	0	0	0	0	0		0	-866				-295.948	658.844	27.5589	25434.1			515.052	22366.1	-811	3068		515.052	519.844	27.5299		-811	-811	139	0.029
2023	528.242	518.057	27.1905	22239.3	1080.78	0	1758	140.7	0.029	5525.93		0	0	0	0	0	0	0		0	-1985.5				1381.53	658.757	27.2195	26860.5			528.242	22239.3	853.284	4621.22		528.242	518.057	27.1905		853.284	853.284	140.7	0.029
2024	541.432	516.27	26.851	22112.5	-1157.5	-2.99563	1582	142.4	0.029	5238.86		0	0	0	0	0	0	0	-3272.49	0	-1235.56	0			-272.625	658.67	26.88	24955.3			541.432	22112.5	-814.057	2842.81		541.432	516.27	26.851		-814.057	-814.057	142.4	0.029
2025	554.622	514.482	26.5115	21985.7	800.055	-11.4679	1406	144.1	0.029	4951.79		1.46832	0.0462421	53.3671	-127.49	0	0	-127.49	-4780.72	0	-2145.47	0	0		603.735	660.051	26.5868	25634			554.622	21985.7	49.113	3648.27		554.622	514.482	26.5115		49.113	49.113	144.1	0.029
2026	567.812	512.695	26.1721	21858.9	415.773	-26.4506	1230	145.8	0.029	4664.73		2.17563	0.0377558	70.9228	-388.642	-0.206665	-0.0252596	-401.122	-4196.51	0	-1662.7	0	0		524.439	660.464	26.2136	25321.1			567.812	21858.9	-43.3726	3462.28		567.812	512.695	26.1721		-43.3726	-43.3726	145.8	0.029
2027	581.002	510.908	25.8326	21732.1	320.294	-52.6976	1054	147.5	0.029	4377.66		2.88277	0.0292694	88.474	-649.766	-0.413329	-0.0505192	-674.726	-4234.96	0	-1679.65	0	0		222.949	660.877	25.8404	24786.1			581.002	21732.1	-358.053	3054.08		581.002	510.908	25.8326		-358.053	-358.053	147.5	0.029
2028	594.192	509.12	25.4932	21605.3	615.799	-90.3019	878	149.2	0.029	4090.59		3.5899	0.0207831	106.025	-910.886	-0.619994	-0.0757788	-948.327	-4166.54	0	-1592.62	0	0		405.069	661.29	25.4672	24734.7			594.192	21605.3	-189.123	3129.49		594.192	509.12	25.4932		-189.123	-189.123	149.2	0.029
2029	607.382	507.333	25.1537	21478.4	927.138	-139.217	702	150.9	0.029	3803.52		4.29702	0.0122967	123.575	-1172	-0.826658	-0.101038	-1221.93	-4482.33	0	-1796.93	0	0		300.375	661.704	25.094	24396.5			607.382	21478.4	-307.007	2918.09		607.382	507.333	25.1537		-307.007	-307.007	150.9	0.029
2030	620.572	505.546	24.8142	21351.6	1691.52	-199.22	526	147	0.029	4667		5.00413	0.00381038	141.126	-1433.12	-1.03332	-0.126298	-1495.53	-5454.2	590	-1956.5	0	0		682.381	656.517	24.7208	25695.6			620.572	21351.6	61.8094	4343.93		620.572	505.546	24.8142		61.8094	61.8094	147	0.029
2031	633.762	503.759	24.4748	21224.8	2843.65	-265.721	591.204	147.461	0.02755	4743.95		5.00413	0.00381038	141.126	-1433.12	-1.03332	-0.126298	-1495.53	-5328.05	590	-1811.06	0	0		1991.83	655.191	24.3798	26876.8			633.762	21224.8	1358.07	5651.94		633.762	503.759	24.4748		1358.07	1358.07	147.461	0.02755
2032	646.952	501.971	24.1353	21098	3437.85	-341.279	656.408	147.923	0.0261	4820.9		5.00413	0.00381038	141.126	-1433.12	-1.03332	-0.126298	-1495.53	-5121	590	-1634.58	0	0		2765.35	653.865	24.0389	27522			646.952	21098	2118.4	6424.02		646.952	501.971	24.1353		2118.4	2118.4	147.923	0.0261
2033	660.142	500.184	23.7959	20971.2	3515.02	-433.466	721.612	148.384	0.02465	4897.85		5.00413	0.00381038	141.126	-1433.12	-1.03332	-0.126298	-1495.53	-5609.4	590	-1899.98	0	0		2563.33	652.539	23.698	27191.7			660.142	20971.2	1903.19	6220.55		660.142	500.184	23.7959		1903.19	1903.19	148.384	0.02465
2034	673.332	498.397	23.4564	20844.4	5726.2	-530.399	786.815	148.845	0.0232	4974.8		5.00413	0.00381038	141.126	-1433.12	-1.03332	-0.126298	-1495.53	-6417.5	590	-2314.34	0	0		4341.61	651.213	23.3571	28841.8			673.332	20844.4	3668.28	7997.39		673.332	498.397	23.4564		3668.28	3668.28	148.845	0.0232
2035	686.522	496.61	23.1169	20717.6	4854.33	-645.388	852.019	149.307	0.02175	5051.75		5.00413	0.00381038	141.126	-1433.12	-1.03332	-0.126298	-1495.53	-5525.09	590	-1811.88	-85.3782	0		3850.23	649.887	23.0162	28222.1			686.522	20717.6	3163.71	7504.56		686.522	496.61	23.1169		3249.08	3163.71	149.307	0.02175
2036	699.712	494.822	22.7775	20590.8	4809.23	-761.157	917.223	149.768	0.0203	5128.7		5.00413	0.00381038	141.126	-1433.12	-1.03332	-0.126298	-1495.53	-5410.17	590	-1778.7	-175.628	0		3710.68	648.561	22.6753	27954.3			699.712	20590.8	3010.97	7363.57		699.712	494.822	22.7775		3186.59	3010.97	149.768	0.0203
2037	712.902	493.035	22.438	20464	5262.7	-878.8	982.427	150.229	0.01885	5205.65		5.00413	0.00381038	141.126	-1433.12	-1.03332	-0.126298	-1495.53	-5506.61	590	-1919.96	-271.93	0		3887.34	647.235	22.3344	28002.7			712.902	20464	3174.44	7538.78		712.902	493.035	22.438		3446.37	3174.44	150.229	0.01885
2038	726.092	491.248	22.0986	20337.1	4646.11	-999.292	1047.63	150.691	0.0174	5282.6		5.00413	0.00381038	141.126	-1433.12	-1.03332	-0.126298	-1495.53	-4903.51	590	-1543.94	-353.869	0		3522.73	645.909	21.9935	27509.9			726.092	20337.1	2796.64	7172.73		726.092	491.248	22.0986		3150.51	2796.64	150.691	0.0174
2039	739.282	489.46	21.7591	20210.3	4116.6	-1119.59	1112.83	151.152	0.01595	5359.55		5.00413	0.00381038	141.126	-1433.12	-1.03332	-0.126298	-1495.53	-4812.32	590	-1531.65	-457.232	0		2860.25	644.583	21.6526	26719.1			739.282	20210.3	2120.96	6508.8		739.282	489.46	21.7591		2578.2	2120.96	151.152	0.01595
2040	752.472	487.673	21.4196	20083.5	2370.95	-1257.45	1178.04	151.613	0.0145	5436.5		5.00413	0.00381038	141.126	-569.253	-1.03332	-0.126298	-631.655	-4111.76	590	-1087.64	-515.307	-156.177		1284.88	643.257	21.3117	25015.5			752.472	20083.5	532.411	4931.99		752.472	487.673	21.4196		1203.9	532.411	151.613	0.0145
2041	765.662	485.886	21.0802	19956.7	3673.08	-1385.77	1243.24	152.075	0.01305	5513.45		5.00413	0.00381038	141.126	-547.8	-1.03332	-0.126298	-610.202	-5306.56	590	-2103.56	-719.724	-182.139		1290.79	641.931	20.9707	24893.2			765.662	19956.7	525.131	4936.46		765.662	485.886	21.0802		1426.99	525.131	152.075	0.01305
2042	778.853	484.099	20.7407	19829.9	2475.5	-1513.37	1308.45	152.536	0.0116	5590.39		5.00413	0.00381038	141.126	-526.347	-1.03332	-0.126298	-588.749	-4448.47	590	-1495.79	-770.351	-208.081		575.21	640.605	20.6298	24049.3			778.853	19829.9	-203.643	4219.43		778.853	484.099	20.7407		774.789	-203.643	152.536	0.0116
2043	792.043	482.311	20.4013	19703.1	1833.91	-1632.77	1373.65	152.997	0.01015	5667.34		5.00413	0.00381038	141.126	-504.894	-1.03332	-0.126298	-567.296	-3993.42	590	-1204.02	-846.402	-234.004		82.4041	639.28	20.2889	23428.3			792.043	19703.1	-709.638	3725.18		792.043	482.311	20.4013		370.768	-709.638	152.997	0.01015
2044	805.233	480.524	20.0618	19576.3	1876.93	-1759.16	1438.85	153.459	0.0087	5744.29		5.00413	0.00381038	141.126	-483.441	-1.03332	-0.126298	-545.843	-3699.19	590	-1116.02	-886.438	-259.908		99.4951	637.954	19.948	23317.1			805.233	19576.3	-705.737	3740.83		805.233	480.524	20.0618		440.608	-705.737	153.459	0.0087
2045	818.423	478.737	19.7223	19449.5	1691.82	-1879.13	1504.06	153.92	0.00725	5821.24		5.00413	0.00381038	141.126	-461.988	-1.03332	-0.126298	-524.39	-3355.13	590	-916.666	-948.155	-285.792		-15.4404	636.628	19.6071	23073.9			818.423	19449.5	-833.863	3624.45		818.423	478.737	19.7223		400.084	-833.863	153.92	0.00725
2046	831.613	476.949	19.3829	19322.7	1582.75	-2000.78	1569.26	154.381	0.0058	5898.19		5.00413	0.00381038	141.126	-440.535	-1.03332	-0.126298	-502.937	-3234.59	590	-902.037	-1057.63	-311.657		-288.479	635.302	19.2662	22672.6			831.613	19322.7	-1120.09	3349.96		831.613	476.949	19.3829		249.195	-1120.09	154.381	0.0058
2047	844.803	475.162	19.0434	19195.9	1573.34	-2114.65	1634.47	154.843	0.00435	5975.14		5.00413	0.00381038	141.126	-419.082	-1.03332	-0.126298	-481.484	-3555.57	590	-1333.03	-1265.09	-337.503		-997.667	633.976	18.9253	21835.2			844.803	19195.9	-1842.47	2639.33		844.803	475.162	19.0434		-239.876	-1842.47	154.843	0.00435
2048	857.993	473.375	18.704	19069	2046.14	-2222.63	1699.67	155.304	0.0029	6052.09		5.00413	0.00381038	141.126	-397.63	-1.03332	-0.126298	-460.032	-3418.74	590	-1340.4	-1373.48	-363.329		-696.04	632.65	18.5844	22008.6			857.993	19069	-1554.03	2939.52		857.993	473.375	18.704		182.778	-1554.03	155.304	0.0029
2049	871.183	471.588	18.3645	18942.2	1406.12	-2326.9	1764.87	155.765	0.00145	6129.04		5.00413	0.00381038	141.126	-376.177	-1.03332	-0.126298	-438.579	-3022.98	590	-1010.41	-1468.16	-389.136		-1152.43	631.324	18.2435	21423.9			871.183	18942.2	-2023.61	2481.68		871.183	471.588	18.3645		-166.321	-2023.61	155.765	0.00145
2050	884.373	469.8	18.025	18815.4	2056.63	-2421.83	1830.08	156.227	0	6205.99		5.00413	0.00381038	141.126	-354.724	-1.03332	-0.126298	-417.126	-2931.85	0	-1120.7	-1538.76	-414.923		-725.136	629.998	17.9026	21723			884.373	18815.4	-1609.51	2907.53		884.373	469.8	18.025		344.175	-1609.51	156.227	0
2051	884.373	469.8	18.025	18815.4	1513.14	-2437.17	1830.08	156.227	0	6205.99		5.00413	0.00381038	141.126	-333.271	-1.03332	-0.126298	-395.673	-3007.68	0	-1435.73	-1679.6	-440.691		-1765.6	629.998	17.9026	20682.5			884.373	18815.4	-2649.97	1867.07		884.373	469.8	18.025		-529.679	-2649.97	156.227	0
2052	884.373	469.8	18.025	18815.4	136.204	-2528.04	1830.08	156.227	0	6205.99		5.00413	0.00381038	141.126	-311.818	-1.03332	-0.126298	-374.22	-2265.09	0	-633.275	-1593.95	-466.44		-2371.05	629.998	17.9026	20077			884.373	18815.4	-3255.42	1261.62		884.373	469.8	18.025		-1195.03	-3255.42	156.227	0
2053	884.373	469.8	18.025	18815.4	110.359	-2527.65	1830.08	156.227	0	6205.99		5.00413	0.00381038	141.126	-290.365	-1.03332	-0.126298	-352.767	-2187.53	0	-714.888	-1718.21	-492.169		-2628.11	629.998	17.9026	19820			884.373	18815.4	-3512.48	1004.56		884.373	469.8	18.025		-1302.1	-3512.48	156.227	0
2054	884.373	469.8	18.025	18815.4	-53.9678	-2603.96	1830.08	156.227	0	6205.99		5.00413	0.00381038	141.126	-268.912	-1.03332	-0.126298	-331.314	-2012.02	0	-660.313	-1801.79	-517.879		-2923.45	629.998	17.9026	19524.6			884.373	18815.4	-3807.83	709.211		884.373	469.8	18.025		-1488.16	-3807.83	156.227	0
2055	884.373	469.8	18.025	18815.4	-36.9913	-2473.6	1830.08	156.227	0	6205.99		5.00413	0.00381038	141.126	-247.459	-1.03332	-0.126298	-309.861	-1943.3	0	-778.822	-1941.46	-543.57		-3060	629.998	17.9026	19388.1			884.373	18815.4	-3944.37	572.666		884.373	469.8	18.025		-1459.34	-3944.37	156.227	0
2056	884.373	469.8	18.025	18815.4	-509.107	-2491.56	1830.08	156.227	0	6205.99		5.00413	0.00381038	141.126	-226.006	-1.03332	-0.126298	-288.408	-1678.58	0	-558.825	-1979.02	-569.241		-3393.31	629.998	17.9026	19054.8			884.373	18815.4	-4277.68	239.356		884.373	469.8	18.025		-1729.42	-4277.68	156.227	0
2057	884.373	469.8	18.025	18815.4	-571.848	-2535.21	1830.08	156.227	0	6205.99		5.00413	0.00381038	141.126	-204.554	-1.03332	-0.126298	-266.956	-1539.54	0	-560.438	-2081.24	-594.893		-3629.18	629.998	17.9026	18818.9			884.373	18815.4	-4513.55	3.48596		884.373	469.8	18.025		-1837.42	-4513.55	156.227	0
2058	884.373	469.8	18.025	18815.4	883.971	-2589.69	1830.08	156.227	0	6205.99		5.00413	0.00381038	141.126	-183.101	-1.03332	-0.126298	-245.503	-1725.73	0	-1289.68	-2441.04	-620.525		-3342.52	629.998	17.9026	19105.6			884.373	18815.4	-4226.89	290.147		884.373	469.8	18.025		-1165.32	-4226.89	156.227	0
2059	884.373	469.8	18.025	18815.4	934.149	-2652.67	1830.08	156.227	0	6205.99		5.00413	0.00381038	141.126	-161.648	-1.03332	-0.126298	-224.05	-1536.28	0	-1239.77	-2553.28	-646.139		-3443.26	629.998	17.9026	19004.8			884.373	18815.4	-4327.63	189.408		884.373	469.8	18.025		-1128.21	-4327.63	156.227	0
2060	884.373	469.8	18.025	18815.4	61.2125	-2431.25	1830.08	156.227	0	6205.99		5.00413	0.00381038	141.126	-140.195	-1.03332	-0.126298	-202.597	-1222.44	0	-832.253	-2536.42	-671.732		-3695.99	629.998	17.9026	18752.1			884.373	18815.4	-4580.36	-63.3232		884.373	469.8	18.025		-1372.21	-4580.36	156.227	0
2061	884.373	469.8	18.025	18815.4	66.3294	-2423.84	1830.08	156.227	0	6205.99		5.00413	0.00381038	141.126	-118.742	-1.03332	-0.126298	-181.144	-1077.28	0	-881.663	-2665.73	-697.568		-3888.02	629.998	17.9026	18560.1			884.373	18815.4	-4772.39	-255.354		884.373	469.8	18.025		-1409.09	-4772.39	156.227	0
2062	884.373	469.8	18.025	18815.4	-100.958	-2456.03	1830.08	156.227	0	6205.99		5.00413	0.00381038	141.126	-97.2891	-1.03332	-0.126298	-159.691	-880.808	0	-744.395	-2748.93	-723.404		-4059.26	629.998	17.9026	18388.8			884.373	18815.4	-4943.64	-426.596		884.373	469.8	18.025		-1471.3	-4943.64	156.227	0
2063	884.373	469.8	18.025	18815.4	-105.637	-2444.7	1830.08	156.227	0	6205.99		5.00413	0.00381038	141.126	-75.8362	-1.03332	-0.126298	-138.238	-722.976	0	-755.719	-2875.08	-749.24		-4215.92	629.998	17.9026	18232.2			884.373	18815.4	-5100.29	-583.252		884.373	469.8	18.025		-1475.98	-5100.29	156.227	0
2064	884.373	469.8	18.025	18815.4	-1048.41	-2488.24	1830.08	156.227	0	6205.99		5.00413	0.00381038	141.126	-54.3834	-1.03332	-0.126298	-116.785	-474.581	0	-216.238	-2778.45	-775.076		-4591.96	629.998	17.9026	17856.1			884.373	18815.4	-5476.33	-959.29		884.373	469.8	18.025		-1922.81	-5476.33	156.227	0
2065	884.373	469.8	18.025	18815.4	-436.163	-2347.85	1830.08	156.227	0	6205.99		5.00413	0.00381038	141.126	-54.3834	-1.03332	-0.126298	-116.785	-553.89	0	-703.875	-3000.1	-775.076		-4548.61	629.998	17.9026	17899.5			884.373	18815.4	-5432.98	-915.944		884.373	469.8	18.025		-1657.81	-5432.98	156.227	0
2066	884.373	469.8	18.025	18815.4	-806.42	-2370.68	1830.08	156.227	0	6205.99		5.00413	0.00381038	141.126	-54.3834	-1.03332	-0.126298	-116.785	-527.816	0	-522.528	-2934.16	-775.076		-4694.42	629.998	17.9026	17753.7			884.373	18815.4	-5578.79	-1061.75		884.373	469.8	18.025		-1869.55	-5578.79	156.227	0
2067	884.373	469.8	18.025	18815.4	-575.472	-2287.01	1830.08	156.227	0	6205.99		5.00413	0.00381038	141.126	-54.3834	-1.03332	-0.126298	-116.785	-561.857	0	-721.081	-3031.02	-775.076		-4675.22	629.998	17.9026	17772.9			884.373	18815.4	-5559.59	-1042.55		884.373	469.8	18.025		-1753.49	-5559.59	156.227	0
2068	884.373	469.8	18.025	18815.4	1617.07	-2319.9	1830.08	156.227	0	6205.99		5.00413	0.00381038	141.126	-54.3834	-1.03332	-0.126298	-116.785	-753.735	0	-1908.14	-3541.74	-775.076		-4213.34	629.998	17.9026	18234.7			884.373	18815.4	-5097.71	-580.675		884.373	469.8	18.025		-780.896	-5097.71	156.227	0
2069	884.373	469.8	18.025	18815.4	876.26	-2354.23	1830.08	156.227	0	6205.99		5.00413	0.00381038	141.126	-54.3834	-1.03332	-0.126298	-116.785	-662.639	0	-1265.48	-3352.97	-775.076		-4157.06	629.998	17.9026	18291			884.373	18815.4	-5041.43	-524.391		884.373	469.8	18.025		-913.379	-5041.43	156.227	0
2070	884.373	469.8	18.025	18815.4	1933.32	-2408.65	1830.08	156.227	0	6205.99		5.00413	0.00381038	141.126	-54.3834	-1.03332	-0.126298	-116.785	-749.208	0	-1773.67	-3594.54	-775.076		-3904.16	629.998	17.9026	18543.9			884.373	18815.4	-4788.54	-271.496		884.373	469.8	18.025		-418.923	-4788.54	156.227	0
2071	884.373	469.8	18.025	18815.4	484.012	-2464.06	1830.08	156.227	0	6205.99		5.00413	0.00381038	141.126	-54.3834	-1.03332	-0.126298	-116.785	-615.966	0	-882.762	-3267.68	-775.076		-4191.12	629.998	17.9026	18257			884.373	18815.4	-5075.49	-558.454		884.373	469.8	18.025		-1032.73	-5075.49	156.227	0
2072	884.373	469.8	18.025	18815.4	270.924	-2527.28	1830.08	156.227	0	6205.99		5.00413	0.00381038	141.126	-54.3834	-1.03332	-0.126298	-116.785	-599.827	0	-749.863	-3247.48	-775.076		-4314.33	629.998	17.9026	18133.8			884.373	18815.4	-5198.7	-681.664		884.373	469.8	18.025		-1176.14	-5198.7	156.227	0
2073	884.373	469.8	18.025	18815.4	79.6252	-2587.19	1830.08	156.227	0	6205.99		5.00413	0.00381038	141.126	-54.3834	-1.03332	-0.126298	-116.785	-585.388	0	-633.567	-3226.24	-775.076		-4428	629.998	17.9026	18020.1			884.373	18815.4	-5312.37	-795.33		884.373	469.8	18.025		-1311.05	-5312.37	156.227	0
2074	884.373	469.8	18.025	18815.4	1025.79	-2653.72	1830.08	156.227	0	6205.99		5.00413	0.00381038	141.126	-54.3834	-1.03332	-0.126298	-116.785	-663.38	0	-1101.63	-3447.41	-775.076		-4237.58	629.998	17.9026	18210.5			884.373	18815.4	-5121.96	-604.918		884.373	469.8	18.025		-899.476	-5121.96	156.227	0
2075	884.373	469.8	18.025	18815.4	1464.27	-2721.57	1830.08	156.227	0	6205.99		5.00413	0.00381038	141.126	-54.3834	-1.03332	-0.126298	-116.785	-707.12	0	-1346.01	-3573.02	-775.076		-4236.96	629.998	17.9026	18211.1			884.373	18815.4	-5121.33	-604.29		884.373	469.8	18.025		-773.234	-5121.33	156.227	0
2076	884.373	469.8	18.025	18815.4	2516.45	-2788.19	1830.08	156.227	0	6205.99		5.00413	0.00381038	141.126	-54.3834	-1.03332	-0.126298	-116.785	-780.336	0	-1762.86	-3790.44	-775.076		-3885.66	629.998	17.9026	18562.4			884.373	18815.4	-4770.04	-252.998		884.373	469.8	18.025		-204.52	-4770.04	156.227	0
2077	884.373	469.8	18.025	18815.4	2026.06	-2824.05	1830.08	156.227	0	6205.99		5.00413	0.00381038	141.126	-54.3834	-1.03332	-0.126298	-116.785	-731.077	0	-1395.87	-3693.49	-775.076		-3947.98	629.998	17.9026	18500.1			884.373	18815.4	-4832.35	-315.311		884.373	469.8	18.025		-363.787	-4832.35	156.227	0
2078	884.373	469.8	18.025	18815.4	1623.44	-2862.98	1830.08	156.227	0	6205.99		5.00413	0.00381038	141.126	-54.3834	-1.03332	-0.126298	-116.785	-705.517	0	-1190.87	-3650.22	-775.076		-4141.25	629.998	17.9026	18306.8			884.373	18815.4	-5025.62	-508.58		884.373	469.8	18.025		-600.326	-5025.62	156.227	0
2079	884.373	469.8	18.025	18815.4	1606.69	-2706.5	1830.08	156.227	0	6205.99		5.00413	0.00381038	141.126	-54.3834	-1.03332	-0.126298	-116.785	-713.778	0	-1199.3	-3704.09	-775.076		-4063.83	629.998	17.9026	18384.3			884.373	18815.4	-4948.2	-431.162		884.373	469.8	18.025		-469.03	-4948.2	156.227	0
2080	884.373	469.8	18.025	18815.4	1995.18	-2747.12	1830.08	156.227	0	6205.99		5.00413	0.00381038	141.126	-54.3834	-1.03332	-0.126298	-116.785	-754.461	0	-1418.35	-3829.35	-775.076		-4060.28	629.998	17.9026	18387.8			884.373	18815.4	-4944.65	-427.615		884.373	469.8	18.025		-340.225	-4944.65	156.227	0
2081	884.373	469.8	18.025	18815.4	2315.16	-2603.82	1830.08	156.227	0	6205.99		5.00413	0.00381038	141.126	-54.3834	-1.03332	-0.126298	-116.785	-778.017	0	-1517.9	-3922.89	-775.076		-3790.07	629.998	17.9026	18658			884.373	18815.4	-4674.45	-157.408		884.373	469.8	18.025		23.5197	-4674.45	156.227	0
2082	884.373	469.8	18.025	18815.4	1719.59	-2625.48	1830.08	156.227	0	6205.99		5.00413	0.00381038	141.126	-54.3834	-1.03332	-0.126298	-116.785	-726.72	0	-1149.57	-3809.21	-775.076		-3925.29	629.998	17.9026	18522.8			884.373	18815.4	-4809.66	-292.622		884.373	469.8	18.025		-225.381	-4809.66	156.227	0
2083	884.373	469.8	18.025	18815.4	1254.2	-2657.39	1830.08	156.227	0	6205.99		5.00413	0.00381038	141.126	-54.3834	-1.03332	-0.126298	-116.785	-692.771	0	-903.206	-3732.63	-775.076		-4099.64	629.998	17.9026	18348.4			884.373	18815.4	-4984.02	-466.978		884.373	469.8	18.025		-476.315	-4984.02	156.227	0
2084	884.373	469.8	18.025	18815.4	1037.95	-2704.44	1830.08	156.227	0	6205.99		5.00413	0.00381038	141.126	-54.3834	-1.03332	-0.126298	-116.785	-670.828	0	-735.435	-3693	-775.076		-4155.55	629.998	17.9026	18292.5			884.373	18815.4	-5039.93	-522.888		884.373	469.8	18.025		-571.849	-5039.93	156.227	0
2085	884.373	469.8	18.025	18815.4	2719.41	-2758.15	1830.08	156.227	0	6205.99		5.00413	0.00381038	141.126	-54.3834	-1.03332	-0.126298	-116.785	-830.275	0	-1718.44	-4118.11	-775.076		-3935.92	629.998	17.9026	18512.2			884.373	18815.4	-4820.3	-303.257		884.373	469.8	18.025		72.8899	-4820.3	156.227	0
2086	884.373	469.8	18.025	18815.4	2689.13	-2802.47	1830.08	156.227	0	6205.99		5.00413	0.00381038	141.126	-54.3834	-1.03332	-0.126298	-116.785	-803.879	0	-1493.03	-4087.76	-775.076		-3754.76	629.998	17.9026	18693.3			884.373	18815.4	-4639.13	-122.092		884.373	469.8	18.025		223.701	-4639.13	156.227	0
2087	884.373	469.8	18.025	18815.4	2354.86	-2854.53	1830.08	156.227	0	6205.99		5.00413	0.00381038	141.126	-54.3834	-1.03332	-0.126298	-116.785	-765.741	0	-1206.33	-4012.07	-775.076		-3778.7	629.998	17.9026	18669.4			884.373	18815.4	-4663.07	-146.033		884.373	469.8	18.025		124.075	-4663.07	156.227	0
2088	884.373	469.8	18.025	18815.4	2073.92	-2910.93	1830.08	156.227	0	6205.99		5.00413	0.00381038	141.126	-54.3834	-1.03332	-0.126298	-116.785	-743.753	0	-1028.62	-3977.5	-775.076		-3903.74	629.998	17.9026	18544.3			884.373	18815.4	-4788.11	-271.076		884.373	469.8	18.025		-35.5428	-4788.11	156.227	0
2089	884.373	469.8	18.025	18815.4	2274.41	-2981.35	1830.08	156.227	0	6205.99		5.00413	0.00381038	141.126	-54.3834	-1.03332	-0.126298	-116.785	-769.78	0	-1163.14	-4056.94	-775.076		-3987.65	629.998	17.9026	18460.4			884.373	18815.4	-4872.02	-354.983		884.373	469.8	18.025		-40.0041	-4872.02	156.227	0
2090	884.373	469.8	18.025	18815.4	1894.34	-3038.93	1830.08	156.227	0	6205.99		5.00413	0.00381038	141.126	-54.3834	-1.03332	-0.126298	-116.785	-737.044	0	-917.82	-3996.16	-775.076		-4119.19	629.998	17.9026	18328.9			884.373	18815.4	-5003.57	-486.526		884.373	469.8	18.025		-232.33	-5003.57	156.227	0
2091	884.373	469.8	18.025	18815.4	1781.78	-3069.69	1830.08	156.227	0	6205.99		5.00413	0.00381038	141.126	-54.3834	-1.03332	-0.126298	-116.785	-726.781	0	-823.706	-3986.26	-775.076		-4158.51	629.998	17.9026	18289.6			884.373	18815.4	-5042.88	-525.843		884.373	469.8	18.025		-281.546	-5042.88	156.227	0
2092	884.373	469.8	18.025	18815.4	2635.08	-3130.7	1830.08	156.227	0	6205.99		5.00413	0.00381038	141.126	-54.3834	-1.03332	-0.126298	-116.785	-797.067	0	-1238.67	-4187.56	-775.076		-3982.47	629.998	17.9026	18465.6			884.373	18815.4	-4866.84	-349.805		884.373	469.8	18.025		95.7872	-4866.84	156.227	0
2093	884.373	469.8	18.025	18815.4	2913.93	-3156.98	1830.08	156.227	0	6205.99		5.00413	0.00381038	141.126	-54.3834	-1.03332	-0.126298	-116.785	-822.818	0	-1362.89	-4273.59	-775.076		-3940.16	629.998	17.9026	18507.9			884.373	18815.4	-4824.54	-307.496		884.373	469.8	18.025		224.134	-4824.54	156.227	0
2094	884.373	469.8	18.025	18815.4	2061.28	-3221.33	1830.08	156.227	0	6205.99		5.00413	0.00381038	141.126	-54.3834	-1.03332	-0.126298	-116.785	-741.623	0	-812.568	-4076.46	-775.076		-4109.71	629.998	17.9026	18338.4			884.373	18815.4	-4994.08	-477.04		884.373	469.8	18.025		-142.544	-4994.08	156.227	0
2095	884.373	469.8	18.025	18815.4	2160.7	-3272.15	1830.08	156.227	0	6205.99		5.00413	0.00381038	141.126	-54.3834	-1.03332	-0.126298	-116.785	-751.006	0	-845.002	-4117.11	-775.076		-4134.19	629.998	17.9026	18313.9			884.373	18815.4	-5018.56	-501.521		884.373	469.8	18.025		-126.372	-5018.56	156.227	0
2096	884.373	469.8	18.025	18815.4	2675.25	-3057.42	1830.08	156.227	0	6205.99		5.00413	0.00381038	141.126	-54.3834	-1.03332	-0.126298	-116.785	-825.241	0	-1287.4	-4322.43	-775.076		-4052.62	629.998	17.9026	18395.5			884.373	18815.4	-4936.99	-419.955		884.373	469.8	18.025		160.509	-4936.99	156.227	0
2097	884.373	469.8	18.025	18815.4	2760.52	-3062.27	1830.08	156.227	0	6205.99		5.00413	0.00381038	141.126	-54.3834	-1.03332	-0.126298	-116.785	-827.467	0	-1256.57	-4358.39	-775.076		-3977.32	629.998	17.9026	18470.8			884.373	18815.4	-4861.7	-344.659		884.373	469.8	18.025		271.765	-4861.7	156.227	0
2098	884.373	469.8	18.025	18815.4	2754.64	-3082.92	1830.08	156.227	0	6205.99		5.00413	0.00381038	141.126	-54.3834	-1.03332	-0.126298	-116.785	-825.382	0	-1206.59	-4368.52	-775.076		-3964.01	629.998	17.9026	18484.1			884.373	18815.4	-4848.38	-331.34		884.373	469.8	18.025		295.212	-4848.38	156.227	0
2099	884.373	469.8	18.025	18815.4	1454.26	-3081.65	1830.08	156.227	0	6205.99		5.00413	0.00381038	141.126	-54.3834	-1.03332	-0.126298	-116.785	-713.979	0	-464.19	-4103.44	-775.076		-4255.65	629.998	17.9026	18192.4			884.373	18815.4	-5140.02	-622.984		884.373	469.8	18.025		-261.503	-5140.02	156.227	0
2100	884.373	469.8	18.025	18815.4	663.604	-3095.15	1830.08	156.227	0	6205.99		5.00413	0.00381038	141.126	-54.3834	-1.03332	-0.126298	-116.785	-630.396	0	71.5339	-3882.94	-775.076		-4303.57	629.998	17.9026	18144.5			884.373	18815.4	-5187.95	-670.908		884.373	469.8	18.025		-529.931	-5187.95	156.227	0

## Sheet: S2b-SI_NZ
AFOLU emissions time series for SI with a net zero climate neutrality constraint
Units: kt per annuam
Year																									Sc-2b
	Agriculture				Forest-old	Afforestation	Other land use				AD-Ag				AD-subtitutions				Wood-substitutions	LUC					AGGREGATION						AG		LULUCF			AGRICULTURE				LULUCF
	CO2	CH4	N2O	CO2e	CO2e	CO2e	CO2	CH4	N2O	CO2e	CO2	CH4	N2O	CO2e	CO2	CH4	N2O	CO2e	CO2e	CO2e	HWP	CCS-wood	CCS-AD		CO2	CH4	N2O	CO2e			CO2	CO2e	CO2	CO2e		CO2	CH4	N2O		CO2 ex BECCS	CO2 inc. BECCS	CH4	N2O					Agriculture	LULUCF
2020	515.052	519.844	27.5299	22366.1	-2082.32	0	3890	130	0.029	7537.69		0	0	0	0	0	0	0		0	-809.02				1513.71	649.844	27.5589	27012.5			515.052	22366.1	998.658	4646.34		515.052	519.844	27.5299		998.658	998.658	130	0.029					22366.1	4646.34
2021	515.052	519.844	27.5299	22366.1	-1440.38	0	2745	134	0.029	6504.69		0	0	0	0	0	0	0		0	-963				856.672	653.844	27.5589	26467.4			515.052	22366.1	341.62	4101.31		515.052	519.844	27.5299		341.62	341.62	134	0.029					22366.1	4101.31
2022	515.052	519.844	27.5299	22366.1	-1879	0	1934	139	0.029	5813		0	0	0	0	0	0	0		0	-866				-295.948	658.844	27.5589	25434.1			515.052	22366.1	-811	3068		515.052	519.844	27.5299		-811	-811	139	0.029					22366.1	3088.68
2023	498.956	503.599	26.6696	21667.2	1080.78	0	1758	140.7	0.029	5525.93		0	0	0	0	0	0	0		0	-1985.5				1352.24	644.299	26.6986	26288.4			498.956	21667.2	853.284	4621.22		498.956	503.599	26.6696		853.284	853.284	140.7	0.029					21667.2	4800.57
2024	482.861	487.354	25.8093	20968.2	-1157.5	-5.31996	1582	142.4	0.029	5238.86		0	0	0	0	0	0	0	-3272.49	0	-1235.56	0			-333.521	629.754	25.8383	23808.7			482.861	20968.2	-816.382	2840.48		482.861	487.354	25.8093		-816.382	-816.382	142.4	0.029					20968.2	3178.5
2025	466.766	471.109	24.949	20269.3	800.055	-19.6606	1406	144.1	0.029	4951.79		1.46832	0.0462421	53.3671	-127.49	0	0	-127.49	-4780.72	0	-2145.47	0	0	0	507.686	616.677	25.0242	23909.4		0	466.766	20269.3	40.9204	3640.08		466.766	471.109	24.949		40.9204	40.9204	144.1	0.029					20269.3	4083.41
2026	450.67	454.864	24.0887	19570.4	415.773	-56.5844	1230	145.8	0.029	4664.73		2.17563	0.0377558	70.9228	-388.642	-0.206665	-0.0252596	-401.122	-4196.51	0	-1662.7	0	0		377.164	602.633	24.1302	23002.5			450.67	19570.4	-73.5064	3432.14		450.67	454.864	24.0887		-73.5064	-73.5064	145.8	0.029					19570.4	4016.58
2027	434.575	438.618	23.2284	18871.4	320.294	-115.995	1054	147.5	0.029	4377.66		2.88277	0.0292694	88.474	-649.766	-0.413329	-0.0505192	-674.726	-4234.96	0	-1679.65	0	0		13.2249	588.588	23.2361	21862.2			434.575	18871.4	-421.35	2990.78		434.575	438.618	23.2284		-421.35	-421.35	147.5	0.029					18871.4	3716.34
2028	418.479	422.373	22.3681	18172.5	615.799	-199.078	878	149.2	0.029	4090.59		3.5899	0.0207831	106.025	-910.886	-0.619994	-0.0757788	-948.327	-4166.54	0	-1592.62	0	0		120.58	574.543	22.3421	21193.2			418.479	18172.5	-297.899	3020.71		418.479	422.373	22.3681		-297.899	-297.899	149.2	0.029					18172.5	3887.39
2029	402.384	406.128	21.5077	17473.5	927.138	-305.794	702	150.9	0.029	3803.52		4.29702	0.0122967	123.575	-1172	-0.826658	-0.101038	-1221.93	-4482.33	0	-1796.93	0	0		-71.1996	560.499	21.448	20225			402.384	17473.5	-473.584	2751.51		402.384	406.128	21.5077		-473.584	-473.584	150.9	0.029					17473.5	3759.3
2030	386.289	389.883	20.6474	16774.6	1691.52	-435.733	526	147	0.029	4667		5.00413	0.00381038	141.126	-1433.12	-1.03332	-0.126298	-1495.53	-5454.2	590	-1956.5	0	0		801.585	540.854	20.5539	21472			386.289	16774.6	415.296	4697.42		386.289	389.883	20.6474		-174.704	-174.704	147	0.029					16774.6	3948.98
2031	376.215	372.573	19.855	16069.8	2843.65	-595.949	568.254	147.59	0.02755	4724.6		5.00413	0.00381038	141.126	-1433.12	-1.03332	-0.126298	-1495.53	-5328.05	590	-1811.06	0	0		1971.11	524.134	19.7601	21962.2			376.215	16069.8	1594.89	5892.36		376.215	372.573	19.855		1004.89	1004.89	147.59	0.02755					16069.8	5144.71
2032	366.142	355.263	19.0625	15365.1	3437.85	-789.322	610.508	148.18	0.0261	4782.19		5.00413	0.00381038	141.126	-1433.12	-1.03332	-0.126298	-1495.53	-5121	590	-1634.58	0	0		2580.6	507.414	18.9662	21892.4			366.142	15365.1	2214.46	6527.27		366.142	355.263	19.0625		1624.46	1624.46	148.18	0.0261					15365.1	5780.4
2033	356.068	337.954	18.2701	14660.3	3515.02	-1014.87	652.763	148.769	0.02465	4839.79		5.00413	0.00381038	141.126	-1433.12	-1.03332	-0.126298	-1495.53	-5609.4	590	-1899.98	0	0		2199	490.694	18.1723	20831.4			356.068	14660.3	1842.93	6171.08		356.068	337.954	18.2701		1252.93	1252.93	148.769	0.02465					14660.3	5425
2034	345.995	320.644	17.4777	13955.6	5726.2	-1266.3	695.017	149.359	0.0232	4897.38		5.00413	0.00381038	141.126	-1433.12	-1.03332	-0.126298	-1495.53	-6417.5	590	-2314.34	0	0		3776.58	473.974	17.3784	21729.7			345.995	13955.6	3430.58	7774.07		345.995	320.644	17.4777		2840.58	2840.58	149.359	0.0232					13955.6	7028.78
2035	335.921	303.334	16.6852	13250.9	4854.33	-1580.63	737.271	149.949	0.02175	4954.98		5.00413	0.00381038	141.126	-1433.12	-1.03332	-0.126298	-1495.53	-5525.09	590	-1811.88	-85.3782	0		3039.64	457.254	16.5845	20313.4			335.921	13250.9	2703.71	7062.55		335.921	303.334	16.6852		2199.09	2113.71	149.949	0.02175					13250.9	6403.42
2036	325.848	286.024	15.8928	12546.1	4809.23	-1908.98	779.525	150.539	0.0203	5012.57		5.00413	0.00381038	141.126	-1433.12	-1.03332	-0.126298	-1495.53	-5410.17	590	-1778.7	-175.628	0		2641.29	440.533	15.7906	19235.7			325.848	12546.1	2315.44	6689.62		325.848	286.024	15.8928		1901.07	1725.44	150.539	0.0203					12546.1	6121.53
2037	315.774	268.714	15.1003	11841.4	5262.7	-2254.52	821.78	151.128	0.01885	5070.17		5.00413	0.00381038	141.126	-1433.12	-1.03332	-0.126298	-1495.53	-5506.61	590	-1919.96	-271.93	0		2543.84	423.813	14.9967	18458.9			315.774	11841.4	2228.07	6617.58		315.774	268.714	15.1003		1910	1638.07	151.128	0.01885					11841.4	6146.59
2038	305.701	251.404	14.3079	11136.6	4646.11	-2602.93	864.034	151.718	0.0174	5127.76		5.00413	0.00381038	141.126	-1433.12	-1.03332	-0.126298	-1495.53	-4904.71	590	-1544.79	-353.918	0		1904.2	407.093	14.2028	17140			305.701	11136.6	1598.5	6003.36		305.701	251.404	14.3079		1362.42	1008.5	151.718	0.0174					11136.6	5615.13
2039	295.627	234.095	13.5154	10431.9	4116.6	-2982.47	906.288	152.308	0.01595	5185.36		5.00413	0.00381038	141.126	-1433.12	-1.03332	-0.126298	-1495.53	-4821.47	590	-1538.33	-457.723	0		929.989	390.373	13.4089	15486.4			295.627	10431.9	634.362	5054.56		295.627	234.095	13.5154		502.085	44.3619	152.308	0.01595					10431.9	4770.93
2040	285.554	216.785	12.723	9727.12	2370.95	-3407.37	948.542	152.898	0.0145	5242.96		5.00413	0.00381038	141.126	-569.253	-1.03332	-0.126298	-631.655	-4127.66	590	-1099.5	-516.392	-156.177		-984.391	373.653	12.615	12892.7			285.554	9727.12	-1269.94	3165.59		285.554	216.785	12.723		-1187.38	-1859.94	152.898	0.0145					9727.12	3097.6
2041	275.48	199.475	11.9305	9022.37	3673.08	-3817.87	990.797	153.487	0.01305	5300.55		5.00413	0.00381038	141.126	-547.8	-1.03332	-0.126298	-610.202	-5335.74	590	-2125.97	-722.154	-182.139		-1318.77	356.933	11.8211	11879			275.48	9022.37	-1594.25	2856.63		275.48	199.475	11.9305		-1279.96	-2184.25	153.487	0.01305					9022.37	3021.15
2042	265.407	182.165	11.1381	8317.62	2475.5	-4252.21	1033.05	154.077	0.0116	5358.15		5.00413	0.00381038	141.126	-526.347	-1.03332	-0.126298	-588.749	-4482.65	590	-1522.49	-773.817	-208.081		-2392.64	340.213	11.0272	10125.8			265.407	8317.62	-2658.04	1808.18		265.407	182.165	11.1381		-2266.15	-3248.04	154.077	0.0116					8317.62	2051.09
2043	255.333	164.855	10.3456	7612.88	1833.91	-4653.31	1075.31	154.667	0.01015	5415.74		5.00413	0.00381038	141.126	-504.894	-1.03332	-0.126298	-567.296	-4042.51	590	-1243.74	-852.264	-234.004		-3228.78	323.493	10.2333	8610.33			255.333	7612.88	-3484.11	997.453		255.333	164.855	10.3456		-2987.84	-4074.11	154.667	0.01015					7612.88	1345.52
2044	245.259	147.545	9.5532	6908.13	1876.93	-5065.79	1117.56	155.257	0.0087	5473.34		5.00413	0.00381038	141.126	-483.441	-1.03332	-0.126298	-545.843	-3761.04	590	-1167.63	-895.102	-259.908		-3558.68	306.773	9.43941	7601.1			245.259	6908.13	-3803.94	692.968		245.259	147.545	9.5532		-3238.93	-4393.94	155.257	0.0087					6908.13	1110.56
2045	235.186	130.236	8.76075	6203.38	1691.82	-5483.59	1159.81	155.846	0.00725	5530.93		5.00413	0.00381038	141.126	-461.988	-1.03332	-0.126298	-524.39	-3437.75	590	-988.408	-961.512	-285.792		-4042.48	290.053	8.64552	6437.96			235.186	6203.38	-4277.67	234.575		235.186	130.236	8.76075		-3620.37	-4867.67	155.846	0.00725					6203.38	745.253
2046	225.112	112.926	7.96831	5498.64	1582.75	-5899.09	1202.07	156.436	0.0058	5588.53		5.00413	0.00381038	141.126	-440.535	-1.03332	-0.126298	-502.937	-3336.38	590	-993.741	-1076.6	-311.657		-4681.16	273.333	7.85162	5119.95			225.112	5498.64	-4906.27	-378.686		225.112	112.926	7.96831		-4108.02	-5496.27	156.436	0.0058					5498.64	273.734
2047	215.039	95.616	7.17586	4793.89	1573.34	-6310.68	1244.32	157.026	0.00435	5646.13		5.00413	0.00381038	141.126	-419.082	-1.03332	-0.126298	-481.484	-3674.45	590	-1444.11	-1290.58	-337.503		-5760.17	256.613	7.05773	3361.6			215.039	4793.89	-5975.21	-1432.29		215.039	95.616	7.17586		-4937.14	-6565.21	157.026	0.00435					4793.89	-539.258
2048	204.965	78.3061	6.38342	4089.14	2046.14	-6697.88	1286.58	157.616	0.0029	5703.72		5.00413	0.00381038	141.126	-397.63	-1.03332	-0.126298	-460.032	-3556.64	590	-1474.63	-1407.29	-363.329		-5815.45	239.893	6.26383	2627			204.965	4089.14	-6020.41	-1462.14		204.965	78.3061	6.38342		-4839.79	-6610.41	157.616	0.0029					4089.14	-425.788
2049	194.892	60.9963	5.59097	3384.4	1406.12	-7078.54	1328.83	158.205	0.00145	5761.32		5.00413	0.00381038	141.126	-376.177	-1.03332	-0.126298	-438.579	-3172.29	590	-1161.32	-1510.16	-389.136		-6619.31	223.173	5.46993	1143.8			194.892	3384.4	-6814.21	-2240.6		194.892	60.9963	5.59097		-5504.91	-7404.21	158.205	0.00145					3384.4	-1074.78
2050	184.818	43.6865	4.79853	2679.65	2056.63	-7433.49	1371.08	158.795	0	5818.91		5.00413	0.00381038	141.126	-354.724	-1.03332	-0.126298	-417.126	-3101.54	0	-1300.92	-1592.95	-414.923		-7129.75	206.452	4.67604	-45.9686			184.818	2679.65	-7314.57	-2725.62		184.818	43.6865	4.79853		-5306.7	-7314.57	158.795	0		-44065.8			2679.65	-860.437
2051	184.818	43.6865	4.79853	2679.65	1513.14	-7620.2	1371.08	158.795	0	5818.91		5.00413	0.00381038	141.126	-333.271	-1.03332	-0.126298	-395.673	-3221.78	0	-1679.11	-1756.05	-440.691		-8427.01	206.452	4.67604	-1343.23			184.818	2679.65	-8611.83	-4022.88		184.818	43.6865	4.79853		-6415.08	-8611.83	158.795	0					2679.65	-1968.82
2052	184.818	43.6865	4.79853	2679.65	136.204	-7929.62	1371.08	158.795	0	5818.91		5.00413	0.00381038	141.126	-311.818	-1.03332	-0.126298	-374.22	-2492.51	0	-904.597	-1686.86	-466.44		-9295.4	206.452	4.67604	-2211.62			184.818	2679.65	-9480.22	-4891.27		184.818	43.6865	4.79853		-7326.93	-9480.22	158.795	0					2679.65	-2880.66
2053	184.818	43.6865	4.79853	2679.65	110.359	-7679.34	1371.08	158.795	0	5818.91		5.00413	0.00381038	141.126	-290.365	-1.03332	-0.126298	-352.767	-2582.49	0	-1242.05	-1892.53	-492.169		-9639.83	206.452	4.67604	-2556.05			184.818	2679.65	-9824.65	-5235.7		184.818	43.6865	4.79853		-7439.95	-9824.65	158.795	0					2679.65	-2993.68
2054	184.818	43.6865	4.79853	2679.65	-53.9678	-7900.07	1371.08	158.795	0	5818.91		5.00413	0.00381038	141.126	-268.912	-1.03332	-0.126298	-331.314	-2398.06	0	-1199.39	-1999.92	-517.879		-10115.3	206.452	4.67604	-3031.53			184.818	2679.65	-10300.1	-5711.18		184.818	43.6865	4.79853		-7782.34	-10300.1	158.795	0					2679.65	-3336.08
2055	184.818	43.6865	4.79853	2679.65	-36.9913	-7844.57	1371.08	158.795	0	5818.91		5.00413	0.00381038	141.126	-247.459	-1.03332	-0.126298	-309.861	-2341.83	0	-1370.28	-2177.49	-543.57		-10417	206.452	4.67604	-3333.22			184.818	2679.65	-10601.8	-6012.86		184.818	43.6865	4.79853		-7880.75	-10601.8	158.795	0					2679.65	-3434.49
2056	184.818	43.6865	4.79853	2679.65	-509.107	-8025.32	1371.08	158.795	0	5818.91		5.00413	0.00381038	141.126	-226.006	-1.03332	-0.126298	-288.408	-2056.94	0	-1153.38	-2241.04	-569.241		-10942.2	206.452	4.67604	-3858.4			184.818	2679.65	-11127	-6538.05		184.818	43.6865	4.79853		-8316.72	-11127	158.795	0					2679.65	-3870.45
2057	184.818	43.6865	4.79853	2679.65	-571.848	-8248.48	1371.08	158.795	0	5818.91		5.00413	0.00381038	141.126	-204.554	-1.03332	-0.126298	-266.956	-1895.47	0	-1157.74	-2370.54	-594.893		-11387.6	206.452	4.67604	-4303.82			184.818	2679.65	-11572.4	-6983.47		184.818	43.6865	4.79853		-8606.99	-11572.4	158.795	0					2679.65	-4160.72
2058	184.818	43.6865	4.79853	2679.65	883.971	-7932.81	1371.08	158.795	0	5818.91		5.00413	0.00381038	141.126	-183.101	-1.03332	-0.126298	-245.503	-2182.26	0	-2168.53	-2856.49	-620.525		-11138.5	206.452	4.67604	-4054.7			184.818	2679.65	-11323.3	-6734.35		184.818	43.6865	4.79853		-7846.29	-11323.3	158.795	0					2679.65	-3400.02
2059	184.818	43.6865	4.79853	2679.65	934.149	-8132.52	1371.08	158.795	0	5818.91		5.00413	0.00381038	141.126	-161.648	-1.03332	-0.126298	-224.05	-1947.67	0	-2099.51	-3002.3	-646.139		-11390.4	206.452	4.67604	-4306.64			184.818	2679.65	-11575.2	-6986.29		184.818	43.6865	4.79853		-7926.8	-11575.2	158.795	0					2679.65	-3480.54
2060	184.818	43.6865	4.79853	2679.65	61.2125	-8312.06	1371.08	158.795	0	5818.91		5.00413	0.00381038	141.126	-140.195	-1.03332	-0.126298	-202.597	-1543.9	0	-1549.06	-2972.87	-671.732		-11888.6	206.452	4.67604	-4804.82			184.818	2679.65	-12073.4	-7484.47		184.818	43.6865	4.79853		-8428.82	-12073.4	158.795	0					2679.65	-3982.56
2061	184.818	43.6865	4.79853	2679.65	66.3294	-8344.87	1371.08	158.795	0	5818.91		5.00413	0.00381038	141.126	-118.742	-1.03332	-0.126298	-181.144	-1382.33	0	-1665.33	-3165.68	-697.568		-12251.2	206.452	4.67604	-5167.43			184.818	2679.65	-12436	-7847.08		184.818	43.6865	4.79853		-8572.78	-12436	158.795	0					2679.65	-4126.52
2062	184.818	43.6865	4.79853	2679.65	-100.958	-8455.8	1371.08	158.795	0	5818.91		5.00413	0.00381038	141.126	-97.2891	-1.03332	-0.126298	-159.691	-1154.65	0	-1568.77	-3307.14	-723.404		-12600.2	206.452	4.67604	-5516.4			184.818	2679.65	-12785	-8196.05		184.818	43.6865	4.79853		-8754.45	-12785	158.795	0					2679.65	-4308.18
2063	184.818	43.6865	4.79853	2679.65	-105.637	-8206.79	1371.08	158.795	0	5818.91		5.00413	0.00381038	141.126	-75.8362	-1.03332	-0.126298	-138.238	-991.712	0	-1775.34	-3560.91	-749.24		-12842	206.452	4.67604	-5758.24			184.818	2679.65	-13026.8	-8437.89		184.818	43.6865	4.79853		-8716.69	-13026.8	158.795	0					2679.65	-4270.42
2064	184.818	43.6865	4.79853	2679.65	-1048.41	-8162.89	1371.08	158.795	0	5818.91		5.00413	0.00381038	141.126	-54.3834	-1.03332	-0.126298	-116.785	-700.469	0	-1322.42	-3558.03	-775.076		-13310.9	206.452	4.67604	-6227.13			184.818	2679.65	-13495.7	-8906.78		184.818	43.6865	4.79853		-9162.63	-13495.7	158.795	0					2679.65	-4716.36
2065	184.818	43.6865	4.79853	2679.65	-436.163	-8265.23	1371.08	158.795	0	5818.91		5.00413	0.00381038	141.126	-54.3834	-1.03332	-0.126298	-116.785	-773.135	0	-1732.77	-3780.91	-775.076		-13434.2	206.452	4.67604	-6350.46			184.818	2679.65	-13619.1	-9030.11		184.818	43.6865	4.79853		-9063.07	-13619.1	158.795	0					2679.65	-4616.81
2066	184.818	43.6865	4.79853	2679.65	-806.42	-8093.66	1371.08	158.795	0	5818.91		5.00413	0.00381038	141.126	-54.3834	-1.03332	-0.126298	-116.785	-778.554	0	-1714.61	-3818.82	-775.076		-13652.7	206.452	4.67604	-6568.91			184.818	2679.65	-13837.5	-9248.55		184.818	43.6865	4.79853		-9243.61	-13837.5	158.795	0					2679.65	-4797.34
2067	184.818	43.6865	4.79853	2679.65	-575.472	-8235.66	1371.08	158.795	0	5818.91		5.00413	0.00381038	141.126	-54.3834	-1.03332	-0.126298	-116.785	-806.128	0	-1834.22	-3918.89	-775.076		-13783.4	206.452	4.67604	-6699.64			184.818	2679.65	-13968.2	-9379.29		184.818	43.6865	4.79853		-9274.27	-13968.2	158.795	0					2679.65	-4828.01
2068	184.818	43.6865	4.79853	2679.65	1617.07	-8178.64	1371.08	158.795	0	5818.91		5.00413	0.00381038	141.126	-54.3834	-1.03332	-0.126298	-116.785	-1024.26	0	-3149.1	-4520.64	-775.076		-13450.5	206.452	4.67604	-6366.71			184.818	2679.65	-13635.3	-9046.36		184.818	43.6865	4.79853		-8339.59	-13635.3	158.795	0					2679.65	-3893.33
2069	184.818	43.6865	4.79853	2679.65	876.26	-8199.67	1371.08	158.795	0	5818.91		5.00413	0.00381038	141.126	-54.3834	-1.03332	-0.126298	-116.785	-950.085	0	-2571.84	-4399.68	-775.076		-13514.1	206.452	4.67604	-6430.32			184.818	2679.65	-13698.9	-9109.97		184.818	43.6865	4.79853		-8524.17	-13698.9	158.795	0					2679.65	-4077.91
2070	184.818	43.6865	4.79853	2679.65	1933.32	-8331.96	1371.08	158.795	0	5818.91		5.00413	0.00381038	141.126	-54.3834	-1.03332	-0.126298	-116.785	-1045.36	0	-3092.07	-4687.78	-775.076		-13397.7	206.452	4.67604	-6313.88			184.818	2679.65	-13582.5	-8993.53		184.818	43.6865	4.79853		-8119.62	-13582.5	158.795	0					2679.65	-3673.36
2071	184.818	43.6865	4.79853	2679.65	484.012	-8535.22	1371.08	158.795	0	5818.91		5.00413	0.00381038	141.126	-54.3834	-1.03332	-0.126298	-116.785	-915.766	0	-2181.3	-4393.9	-775.076		-13845.6	206.452	4.67604	-6761.8			184.818	2679.65	-14030.4	-9441.45		184.818	43.6865	4.79853		-8861.43	-14030.4	158.795	0					2679.65	-4415.16
2072	184.818	43.6865	4.79853	2679.65	270.924	-8594.81	1371.08	158.795	0	5818.91		5.00413	0.00381038	141.126	-54.3834	-1.03332	-0.126298	-116.785	-917.032	0	-2115.03	-4443.81	-775.076		-14101.9	206.452	4.67604	-7018.12			184.818	2679.65	-14286.7	-9697.77		184.818	43.6865	4.79853		-9067.84	-14286.7	158.795	0					2679.65	-4621.58
2073	184.818	43.6865	4.79853	2679.65	79.6252	-8832.26	1371.08	158.795	0	5818.91		5.00413	0.00381038	141.126	-54.3834	-1.03332	-0.126298	-116.785	-906.772	0	-1980.69	-4457.78	-775.076		-14410.3	206.452	4.67604	-7326.5			184.818	2679.65	-14595.1	-10006.1		184.818	43.6865	4.79853		-9362.25	-14595.1	158.795	0					2679.65	-4915.98
2074	184.818	43.6865	4.79853	2679.65	1025.79	-9066.47	1371.08	158.795	0	5818.91		5.00413	0.00381038	141.126	-54.3834	-1.03332	-0.126298	-116.785	-989.568	0	-2435.22	-4715.52	-775.076		-14410.6	206.452	4.67604	-7326.8			184.818	2679.65	-14595.4	-10006.4		184.818	43.6865	4.79853		-9104.81	-14595.4	158.795	0					2679.65	-4658.54
2075	184.818	43.6865	4.79853	2679.65	1464.27	-9299.4	1371.08	158.795	0	5818.91		5.00413	0.00381038	141.126	-54.3834	-1.03332	-0.126298	-116.785	-1038.21	0	-2667.15	-4877.74	-775.076		-14599.2	206.452	4.67604	-7515.42			184.818	2679.65	-14784	-10195.1		184.818	43.6865	4.79853		-9131.2	-14784	158.795	0					2679.65	-4684.93
2076	184.818	43.6865	4.79853	2679.65	2516.45	-9540.08	1371.08	158.795	0	5818.91		5.00413	0.00381038	141.126	-54.3834	-1.03332	-0.126298	-116.785	-1116.32	0	-3071.89	-5131.51	-775.076		-14446.2	206.452	4.67604	-7362.41			184.818	2679.65	-14631	-10042.1		184.818	43.6865	4.79853		-8724.43	-14631	158.795	0					2679.65	-4278.16
2077	184.818	43.6865	4.79853	2679.65	2026.06	-9787.36	1371.08	158.795	0	5818.91		5.00413	0.00381038	141.126	-54.3834	-1.03332	-0.126298	-116.785	-1069.24	0	-2676.29	-5063.28	-775.076		-14720	206.452	4.67604	-7636.26			184.818	2679.65	-14904.9	-10315.9		184.818	43.6865	4.79853		-9066.51	-14904.9	158.795	0					2679.65	-4620.24
2078	184.818	43.6865	4.79853	2679.65	1623.44	-10002.7	1371.08	158.795	0	5818.91		5.00413	0.00381038	141.126	-54.3834	-1.03332	-0.126298	-116.785	-1049.07	0	-2463.68	-5057	-775.076		-15119.1	206.452	4.67604	-8035.28			184.818	2679.65	-15303.9	-10714.9		184.818	43.6865	4.79853		-9471.81	-15303.9	158.795	0					2679.65	-5025.55
2079	184.818	43.6865	4.79853	2679.65	1606.69	-9998.59	1371.08	158.795	0	5818.91		5.00413	0.00381038	141.126	-54.3834	-1.03332	-0.126298	-116.785	-1065.27	0	-2480.64	-5154.65	-775.076		-15246.4	206.452	4.67604	-8162.59			184.818	2679.65	-15431.2	-10842.2		184.818	43.6865	4.79853		-9501.46	-15431.2	158.795	0					2679.65	-5055.2
2080	184.818	43.6865	4.79853	2679.65	1995.18	-10206.9	1371.08	158.795	0	5818.91		5.00413	0.00381038	141.126	-54.3834	-1.03332	-0.126298	-116.785	-1111.53	0	-2693.18	-5317.36	-775.076		-15441.5	206.452	4.67604	-8357.7			184.818	2679.65	-15626.3	-11037.4		184.818	43.6865	4.79853		-9533.86	-15626.3	158.795	0					2679.65	-5087.6
2081	184.818	43.6865	4.79853	2679.65	2315.16	-9692.71	1371.08	158.795	0	5818.91		5.00413	0.00381038	141.126	-54.3834	-1.03332	-0.126298	-116.785	-1184.32	0	-3058.93	-5567.31	-775.076		-15223	206.452	4.67604	-8139.18			184.818	2679.65	-15407.8	-10818.8		184.818	43.6865	4.79853		-9065.39	-15407.8	158.795	0					2679.65	-4619.13
2082	184.818	43.6865	4.79853	2679.65	1719.59	-9800.31	1371.08	158.795	0	5818.91		5.00413	0.00381038	141.126	-54.3834	-1.03332	-0.126298	-116.785	-1137.15	0	-2666.67	-5491.7	-775.076		-15458.3	206.452	4.67604	-8374.49			184.818	2679.65	-15643.1	-11054.1		184.818	43.6865	4.79853		-9376.31	-15643.1	158.795	0					2679.65	-4930.05
2083	184.818	43.6865	4.79853	2679.65	1254.2	-9868.68	1371.08	158.795	0	5818.91		5.00413	0.00381038	141.126	-54.3834	-1.03332	-0.126298	-116.785	-1109.46	0	-2410.44	-5458.56	-775.076		-15702.6	206.452	4.67604	-8618.86			184.818	2679.65	-15887.5	-11298.5		184.818	43.6865	4.79853		-9653.83	-15887.5	158.795	0					2679.65	-5207.57
2084	184.818	43.6865	4.79853	2679.65	1037.95	-9946.38	1371.08	158.795	0	5818.91		5.00413	0.00381038	141.126	-54.3834	-1.03332	-0.126298	-116.785	-1093.28	0	-2230.07	-5460.85	-775.076		-15818.5	206.452	4.67604	-8734.73			184.818	2679.65	-16003.3	-11414.4		184.818	43.6865	4.79853		-9767.41	-16003.3	158.795	0					2679.65	-5321.15
2085	184.818	43.6865	4.79853	2679.65	2719.41	-10026	1371.08	158.795	0	5818.91		5.00413	0.00381038	141.126	-54.3834	-1.03332	-0.126298	-116.785	-1257.87	0	-3197.1	-5925.97	-775.076		-15648.8	206.452	4.67604	-8565.03			184.818	2679.65	-15833.6	-11244.7		184.818	43.6865	4.79853		-9132.59	-15833.6	158.795	0					2679.65	-4686.32
2086	184.818	43.6865	4.79853	2679.65	2689.13	-9552.11	1371.08	158.795	0	5818.91		5.00413	0.00381038	141.126	-54.3834	-1.03332	-0.126298	-116.785	-1281.37	0	-3235.43	-6057.34	-775.076		-15374.9	206.452	4.67604	-8291.15			184.818	2679.65	-15559.7	-10970.8		184.818	43.6865	4.79853		-8727.33	-15559.7	158.795	0					2679.65	-4281.07
2087	184.818	43.6865	4.79853	2679.65	2354.86	-9555.59	1371.08	158.795	0	5818.91		5.00413	0.00381038	141.126	-54.3834	-1.03332	-0.126298	-116.785	-1247.23	0	-2917.5	-6022.85	-775.076		-15360.3	206.452	4.67604	-8276.47			184.818	2679.65	-15545.1	-10956.1		184.818	43.6865	4.79853		-8747.14	-15545.1	158.795	0					2679.65	-4300.88
2088	184.818	43.6865	4.79853	2679.65	2073.92	-9536.93	1371.08	158.795	0	5818.91		5.00413	0.00381038	141.126	-54.3834	-1.03332	-0.126298	-116.785	-1231.28	0	-2722.39	-6034.5	-775.076		-15439.1	206.452	4.67604	-8355.29			184.818	2679.65	-15623.9	-11034.9		184.818	43.6865	4.79853		-8814.32	-15623.9	158.795	0					2679.65	-4368.05
2089	184.818	43.6865	4.79853	2679.65	2274.41	-9555.11	1371.08	158.795	0	5818.91		5.00413	0.00381038	141.126	-54.3834	-1.03332	-0.126298	-116.785	-1261.22	0	-2826.76	-6154.02	-775.076		-15480.7	206.452	4.67604	-8396.87			184.818	2679.65	-15665.5	-11076.5		184.818	43.6865	4.79853		-8736.37	-15665.5	158.795	0					2679.65	-4290.11
2090	184.818	43.6865	4.79853	2679.65	1894.34	-9517.58	1371.08	158.795	0	5818.91		5.00413	0.00381038	141.126	-54.3834	-1.03332	-0.126298	-116.785	-1231.91	0	-2549.33	-6131.48	-775.076		-15523.2	206.452	4.67604	-8439.44			184.818	2679.65	-15708	-11119.1		184.818	43.6865	4.79853		-8801.49	-15708	158.795	0					2679.65	-4355.22
2091	184.818	43.6865	4.79853	2679.65	1781.78	-9461.26	1371.08	158.795	0	5818.91		5.00413	0.00381038	141.126	-54.3834	-1.03332	-0.126298	-116.785	-1226.57	0	-2433.48	-6163.32	-775.076		-15495.5	206.452	4.67604	-8411.68			184.818	2679.65	-15680.3	-11091.3		184.818	43.6865	4.79853		-8741.88	-15680.3	158.795	0					2679.65	-4295.62
2092	184.818	43.6865	4.79853	2679.65	2635.08	-9435.12	1371.08	158.795	0	5818.91		5.00413	0.00381038	141.126	-54.3834	-1.03332	-0.126298	-116.785	-1301.78	0	-2827.41	-6405.95	-775.076		-15252.6	206.452	4.67604	-8168.79			184.818	2679.65	-15437.4	-10848.4		184.818	43.6865	4.79853		-8256.36	-15437.4	158.795	0					2679.65	-3810.1
2093	184.818	43.6865	4.79853	2679.65	2913.93	-9281.9	1371.08	158.795	0	5818.91		5.00413	0.00381038	141.126	-54.3834	-1.03332	-0.126298	-116.785	-1339.6	0	-2975.93	-6552.45	-775.076		-15115.5	206.452	4.67604	-8031.74			184.818	2679.65	-15300.3	-10711.4		184.818	43.6865	4.79853		-7972.82	-15300.3	158.795	0					2679.65	-3526.55
2094	184.818	43.6865	4.79853	2679.65	2061.28	-9276.55	1371.08	158.795	0	5818.91		5.00413	0.00381038	141.126	-54.3834	-1.03332	-0.126298	-116.785	-1260.61	0	-2387.54	-6389.27	-775.076		-15211.3	206.452	4.67604	-8127.48			184.818	2679.65	-15396.1	-10807.1		184.818	43.6865	4.79853		-8231.73	-15396.1	158.795	0					2679.65	-3785.47
2095	184.818	43.6865	4.79853	2679.65	2160.7	-9210.78	1371.08	158.795	0	5818.91		5.00413	0.00381038	141.126	-54.3834	-1.03332	-0.126298	-116.785	-1271.88	0	-2381.22	-6462.36	-775.076		-15112.8	206.452	4.67604	-8029.04			184.818	2679.65	-15297.6	-10708.7		184.818	43.6865	4.79853		-8060.21	-15297.6	158.795	0					2679.65	-3613.95
2096	184.818	43.6865	4.79853	2679.65	2675.25	-8957.07	1371.08	158.795	0	5818.91		5.00413	0.00381038	141.126	-54.3834	-1.03332	-0.126298	-116.785	-1345.36	0	-2769.63	-6692.21	-775.076		-14962.8	206.452	4.67604	-7879.05			184.818	2679.65	-15147.7	-10558.7		184.818	43.6865	4.79853		-7680.37	-15147.7	158.795	0					2679.65	-3234.11
2097	184.818	43.6865	4.79853	2679.65	2760.52	-8613.6	1371.08	158.795	0	5818.91		5.00413	0.00381038	141.126	-54.3834	-1.03332	-0.126298	-116.785	-1371.5	0	-2840.54	-6819.02	-775.076		-14731.8	206.452	4.67604	-7648.02			184.818	2679.65	-14916.6	-10327.7		184.818	43.6865	4.79853		-7322.53	-14916.6	158.795	0					2679.65	-2876.26
2098	184.818	43.6865	4.79853	2679.65	2754.64	-8421.01	1371.08	158.795	0	5818.91		5.00413	0.00381038	141.126	-54.3834	-1.03332	-0.126298	-116.785	-1378.57	0	-2796.86	-6881.52	-775.076		-14563.9	206.452	4.67604	-7480.13			184.818	2679.65	-14748.7	-10159.8		184.818	43.6865	4.79853		-7092.14	-14748.7	158.795	0					2679.65	-2645.88
2099	184.818	43.6865	4.79853	2679.65	1454.26	-8273.8	1371.08	158.795	0	5818.91		5.00413	0.00381038	141.126	-54.3834	-1.03332	-0.126298	-116.785	-1270.5	0	-2024.26	-6653.05	-775.076		-14716	206.452	4.67604	-7632.25			184.818	2679.65	-14900.9	-10311.9		184.818	43.6865	4.79853		-7472.73	-14900.9	158.795	0					2679.65	-3026.46
2100	184.818	43.6865	4.79853	2679.65	663.604	-8202.58	1371.08	158.795	0	5818.91		5.00413	0.00381038	141.126	-54.3834	-1.03332	-0.126298	-116.785	-1184.65	0	-1424.45	-6453.37	-775.076		-14636	206.452	4.67604	-7552.18			184.818	2679.65	-14820.8	-10231.8		184.818	43.6865	4.79853		-7592.34	-14820.8	158.795	0					2679.65	-3146.08
																														2031-2035	1780.34	73301.7	11786.6	33427.3
																														2036-2040	1528.5	55683.1	5506.43	27530.7
																														2041-2045	1276.66	38064.4	-15818	6589.81
																														2046-2050	1024.83	20445.7	-31030.7	-8239.33
[truncated: 8 more columns]

## Sheet: S2c-SI_SG
AFOLU emissions time series for SI with a split gas climate neutrality constraint
Units: kt per annuam
Year																									Sc-2c
	Agriculture				Forest-old	Afforestation	Other land use				AD-Ag				AD-subtitutions				Wood-substitutions	LUC					AGGREGATION						AG		LULUCF			AGRICULTURE				LULUCF
	CO2	CH4	N2O	CO2e	CO2e	CO2e	CO2	CH4	N2O	CO2e	CO2	CH4	N2O	CO2e	CO2	CH4	N2O	CO2e	CO2e	CO2e	HWP	CCS-wood	CCS-AD		CO2	CH4	N2O	CO2e			CO2	CO2e	CO2	CO2e		CO2	CH4	N2O		CO2 ex BECCS	CO2 inc. BECCS	CH4	N2O					Agriculture	LULUCF
2020	515.052	519.844	27.5299	22366.1	-2082.32	0	3890	130	0.029	7537.69		0	0	0	0	0	0	0		0	-809.02				1513.71	649.844	27.5589	27012.5			515.052	22366.1	998.658	4646.34		515.052	519.844	27.5299		998.658	998.658	130	0.029					22366.1	4646.34
2021	515.052	519.844	27.5299	22366.1	-1440.38	0	2745	134	0.029	6504.69		0	0	0	0	0	0	0		0	-963				856.672	653.844	27.5589	26467.4			515.052	22366.1	341.62	4101.31		515.052	519.844	27.5299		341.62	341.62	134	0.029					22366.1	4101.31
2022	515.052	519.844	27.5299	22366.1	-1879	0	1934	139	0.029	5813		0	0	0	0	0	0	0		0	-866				-295.948	658.844	27.5589	25434.1			515.052	22366.1	-811	3068		515.052	519.844	27.5299		-811	-811	139	0.029					22366.1	3088.68
2023	498.956	503.599	26.6696	21667.2	1080.78	0	1758	140.7	0.029	5525.93		0	0	0	0	0	0	0		0	-1985.5				1352.24	644.299	26.6986	26288.4			498.956	21667.2	853.284	4621.22		498.956	503.599	26.6696		853.284	853.284	140.7	0.029					21667.2	4800.57
2024	482.861	487.354	25.8093	20968.2	-1157.5	-3.40478	1582	142.4	0.029	5238.86		0	0	0	0	0	0	0	-3391.24	0	-1235.56	0			-331.605	629.754	25.8383	23810.6			482.861	20968.2	-814.466	2842.4		482.861	487.354	25.8093		-814.466	-814.466	142.4	0.029					20968.2	3180.42
2025	466.766	471.109	24.949	20269.3	800.055	-12.5828	1406	144.1	0.029	4951.79		1.46832	0.0462421	53.3671	-127.49	0	0	-127.49	-4825.1	0	-2145.47	0	0		514.764	616.677	25.0242	23916.5			466.766	20269.3	47.9982	3647.16		466.766	471.109	24.949		47.9982	47.9982	144.1	0.029					20269.3	4090.48
2026	450.67	454.864	24.0887	19570.4	415.773	-36.214	1230	145.8	0.029	4664.73		2.17563	0.0377558	70.9228	-388.642	-0.206665	-0.0252596	-401.122	-4245.49	0	-1662.7	0	0		397.534	602.633	24.1302	23022.9			450.67	19570.4	-53.136	3452.51		450.67	454.864	24.0887		-53.136	-53.136	145.8	0.029					19570.4	4036.95
2027	434.575	438.618	23.2284	18871.4	320.294	-74.2366	1054	147.5	0.029	4377.66		2.88277	0.0292694	88.474	-649.766	-0.413329	-0.0505192	-674.726	-4257.96	0	-1679.65	0	0		54.983	588.588	23.2361	21903.9			434.575	18871.4	-379.592	3032.54		434.575	438.618	23.2284		-379.592	-379.592	147.5	0.029					18871.4	3758.09
2028	418.479	422.373	22.3681	18172.5	615.799	-127.41	878	149.2	0.029	4090.59		3.5899	0.0207831	106.025	-910.886	-0.619994	-0.0757788	-948.327	-4195.07	0	-1592.62	0	0		192.248	574.543	22.3421	21264.9			418.479	18172.5	-226.231	3092.38		418.479	422.373	22.3681		-226.231	-226.231	149.2	0.029					18172.5	3959.05
2029	402.384	406.128	21.5077	17473.5	927.138	-195.708	702	150.9	0.029	3803.52		4.29702	0.0122967	123.575	-1172	-0.826658	-0.101038	-1221.93	-4528.08	0	-1796.93	0	0		38.8862	560.499	21.448	20335.1			402.384	17473.5	-363.498	2861.6		402.384	406.128	21.5077		-363.498	-363.498	150.9	0.029					17473.5	3869.39
2030	386.289	389.883	20.6474	16774.6	1691.52	-278.869	526	147	0.029	4667		5.00413	0.00381038	141.126	-1433.12	-1.03332	-0.126298	-1495.53	-5496.07	590	-1956.5	0	0		958.449	540.854	20.5539	21628.9			386.289	16774.6	572.16	4854.29		386.289	389.883	20.6474		-17.8399	-17.8399	147	0.029					16774.6	4105.85
2031	394.566	384.332	20.2177	16513.5	2843.65	-381.407	591.204	147.461	0.02755	4743.95		5.00413	0.00381038	141.126	-1433.12	-1.03332	-0.126298	-1495.53	-5364.43	590	-1811.06	0	0		2226.95	535.764	20.1228	22639.8			394.566	16513.5	1832.38	6126.25		394.566	384.332	20.2177		1242.38	1242.38	147.461	0.02755					16513.5	5378.6
2032	402.843	378.78	19.788	16252.5	3437.85	-505.166	656.408	147.923	0.0261	4820.9		5.00413	0.00381038	141.126	-1433.12	-1.03332	-0.126298	-1495.53	-5157.99	590	-1634.58	0	0		2947.36	530.674	19.6916	23102.6			402.843	16252.5	2544.51	6850.13		402.843	378.78	19.788		1954.51	1954.51	147.923	0.0261					16252.5	6103.27
2033	411.12	373.229	19.3583	15991.5	3515.02	-649.518	721.612	148.384	0.02465	4897.85		5.00413	0.00381038	141.126	-1433.12	-1.03332	-0.126298	-1495.53	-5644.97	590	-1899.98	0	0		2688.26	525.584	19.2604	22586			411.12	15991.5	2277.14	6594.5		411.12	373.229	19.3583		1687.14	1687.14	148.384	0.02465					15991.5	5848.42
2034	419.397	367.678	18.9285	15730.4	5726.2	-810.43	786.815	148.845	0.0232	4974.8		5.00413	0.00381038	141.126	-1433.12	-1.03332	-0.126298	-1495.53	-6435.87	590	-2314.34	0	0		4397.64	520.494	18.8293	24037.8			419.397	15730.4	3978.25	8307.35		419.397	367.678	18.9285		3388.25	3388.25	148.845	0.0232					15730.4	7562.06
2035	427.674	362.126	18.4988	15469.4	4854.33	-1011.6	852.019	149.307	0.02175	5051.75		5.00413	0.00381038	141.126	-1433.12	-1.03332	-0.126298	-1495.53	-5615.84	590	-1811.88	-90.1269	0		3810.42	515.404	18.3981	23193			427.674	15469.4	3382.74	7723.6		427.674	362.126	18.4988		2882.87	2792.74	149.307	0.02175					15469.4	7069.22
2036	435.951	356.575	18.0691	15208.4	4809.23	-1221.75	917.223	149.768	0.0203	5128.7		5.00413	0.00381038	141.126	-1433.12	-1.03332	-0.126298	-1495.53	-5510.31	590	-1778.7	-186.442	0		3565.51	510.314	17.9669	22690.5			435.951	15208.4	3129.56	7482.16		435.951	356.575	18.0691		2726	2539.56	149.768	0.0203					15208.4	6924.89
2037	444.228	351.024	17.6394	14947.3	5262.7	-1442.89	982.427	150.229	0.01885	5205.65		5.00413	0.00381038	141.126	-1433.12	-1.03332	-0.126298	-1495.53	-5621.91	590	-1919.96	-291.224	0		3625.28	505.224	17.5357	22492.7			444.228	14947.3	3181.05	7545.39		444.228	351.024	17.6394		2882.27	2591.05	150.229	0.01885					14947.3	7093.69
2038	452.505	345.473	17.2096	14686.3	4646.11	-1665.88	1047.63	150.691	0.0174	5282.6		5.00413	0.00381038	141.126	-1433.12	-1.03332	-0.126298	-1495.53	-4989.88	590	-1542.17	-374.267	0		3153.93	500.134	17.1046	21763.8			452.505	14686.3	2701.42	7077.51		452.505	345.473	17.2096		2485.69	2111.42	150.691	0.0174					14686.3	6709.64
2039	460.782	339.921	16.7799	14425.3	4116.6	-1908.78	1112.83	151.152	0.01595	5359.55		5.00413	0.00381038	141.126	-1433.12	-1.03332	-0.126298	-1495.53	-4864.99	590	-1531.96	-472.866	0		2366.61	495.044	16.6734	20718.9			460.782	14425.3	1905.83	6293.66		460.782	339.921	16.7799		1788.69	1315.83	151.152	0.01595					14425.3	6025.18
2040	469.059	334.37	16.3502	14164.2	2370.95	-2180.72	1178.04	151.613	0.0145	5436.5		5.00413	0.00381038	141.126	-569.253	-1.03332	-0.126298	-631.655	-4156.19	590	-1089.96	-530.892	-156.177		650.299	489.954	16.2422	18745			469.059	14164.2	181.24	4580.82		469.059	334.37	16.3502		278.309	-408.76	151.613	0.0145					14164.2	4527.33
2041	477.336	328.819	15.9205	13903.2	3673.08	-2443.43	1243.24	152.075	0.01305	5513.45		5.00413	0.00381038	141.126	-547.8	-1.03332	-0.126298	-610.202	-5330.24	590	-2110.28	-727.217	-182.139		520.588	484.864	15.811	18357.8			477.336	13903.2	43.2519	4454.58		477.336	328.819	15.9205		362.608	-546.748	152.075	0.01305					13903.2	4624.16
2042	485.613	323.267	15.4908	13642.1	2475.5	-2721.41	1308.45	152.536	0.0116	5590.39		5.00413	0.00381038	141.126	-526.347	-1.03332	-0.126298	-588.749	-4479.82	590	-1502.96	-783.175	-208.081		-356.071	479.774	15.3799	17223.5			485.613	13642.1	-841.685	3581.39		485.613	323.267	15.4908		-440.428	-1431.68	152.536	0.0116					13642.1	3833.66
2043	493.89	317.716	15.061	13381.1	1833.91	-2978.12	1373.65	152.997	0.01015	5667.34		5.00413	0.00381038	141.126	-504.894	-1.03332	-0.126298	-567.296	-4014.81	590	-1215.21	-852.847	-234.004		-988.731	474.684	14.9487	16333.3			493.89	13381.1	-1482.62	2952.2		493.89	317.716	15.061		-985.77	-2072.62	152.997	0.01015					13381.1	3300.85
2044	502.167	312.165	14.6313	13120.1	1876.93	-3242.11	1438.85	153.459	0.0087	5744.29		5.00413	0.00381038	141.126	-483.441	-1.03332	-0.126298	-545.843	-3743.76	590	-1132.88	-907.082	-259.908		-1134.02	469.594	14.5175	15930.5			502.167	13120.1	-1636.19	2810.38		502.167	312.165	14.6313		-1059.2	-2226.19	153.459	0.0087					13120.1	3239.95
2045	510.444	306.613	14.2016	12859	1691.82	-3509.5	1504.06	153.92	0.00725	5821.24		5.00413	0.00381038	141.126	-461.988	-1.03332	-0.126298	-524.39	-3420.05	590	-942.503	-982.524	-285.792		-1424	464.504	14.0863	15382.9			510.444	12859	-1934.44	2523.87		510.444	306.613	14.2016		-1256.12	-2524.44	153.92	0.00725					12859	3055.56
2046	518.722	301.062	13.7719	12598	1582.75	-3775.42	1569.26	154.381	0.0058	5898.19		5.00413	0.00381038	141.126	-440.535	-1.03332	-0.126298	-502.937	-3305.55	590	-937.853	-1095.15	-311.657		-1859.35	459.414	13.6552	14690			518.722	12598	-2378.07	2091.98		518.722	301.062	13.7719		-1561.26	-2968.07	154.381	0.0058					12598	2762.96
2047	526.999	295.511	13.3421	12337	1573.34	-4038.84	1634.47	154.843	0.00435	5975.14		5.00413	0.00381038	141.126	-419.082	-1.03332	-0.126298	-481.484	-3607.8	590	-1377.48	-1280.83	-337.503		-2709.85	454.324	13.224	13581.9			526.999	12337	-3236.85	1244.95		526.999	295.511	13.3421		-2208.52	-3826.85	154.843	0.00435					12337	2128.23
2048	535.276	289.959	12.9124	12075.9	2046.14	-4286.64	1699.67	155.304	0.0029	6052.09		5.00413	0.00381038	141.126	-397.63	-1.03332	-0.126298	-460.032	-3495.49	590	-1395.91	-1412.3	-363.329		-2587.1	449.234	12.7928	13447.1			535.276	12075.9	-3122.37	1371.18		535.276	289.959	12.9124		-1936.74	-3712.37	155.304	0.0029					12075.9	2412.55
2049	543.553	284.408	12.4827	11814.9	1406.12	-4530.27	1764.87	155.765	0.00145	6129.04		5.00413	0.00381038	141.126	-376.177	-1.03332	-0.126298	-438.579	-3105.08	590	-1072.94	-1514.32	-389.136		-3202.11	444.144	12.3617	12574.5			543.553	11814.9	-3745.67	759.628		543.553	284.408	12.4827		-2432.21	-4335.67	155.765	0.00145					11814.9	1929.61
2050	551.83	278.857	12.053	11553.9	2056.63	-4757.44	1830.08	156.227	0	6205.99		5.00413	0.00381038	141.126	-354.724	-1.03332	-0.126298	-417.126	-3034.25	0	-1197.7	-1609.62	-414.923		-3540.6	439.054	11.9305	11977.9			551.83	11553.9	-4092.43	424.068		551.83	278.857	12.053		-2068.43	-4092.97	156.227	0					11553.9	2305.92
2051	551.83	278.857	12.053	11553.9	1513.14	-4876.93	1830.08	156.227	0	6205.99		5.00413	0.00381038	141.126	-333.271	-1.03332	-0.126298	-395.673	-3158.16	0	-1535.43	-1822.12	-440.691		-4780.12	439.054	11.9305	10738.9			551.83	11553.9	-5331.95	-814.91		551.83	278.857	12.053		-3069.14	-5331.95	156.227	0					11553.9	1305.21
2052	551.83	278.857	12.053	11553.9	136.204	-5074.96	1830.08	156.227	0	6205.99		5.00413	0.00381038	141.126	-311.818	-1.03332	-0.126298	-374.22	-2406.38	0	-749.905	-1721.7	-466.44		-5494.89	439.054	11.9305	10024.2			551.83	11553.9	-6046.72	-1529.68		551.83	278.857	12.053		-3858.58	-6046.72	156.227	0					11553.9	515.772
2053	551.83	278.857	12.053	11553.9	110.359	-4914.78	1830.08	156.227	0	6205.99		5.00413	0.00381038	141.126	-290.365	-1.03332	-0.126298	-352.767	-2427.67	0	-978.337	-1905.63	-492.169		-5798.64	439.054	11.9305	9720.42			551.83	11553.9	-6350.47	-1833.43		551.83	278.857	12.053		-3952.68	-6350.47	156.227	0					11553.9	421.672
2054	551.83	278.857	12.053	11553.9	-53.9678	-5056.04	1830.08	156.227	0	6205.99		5.00413	0.00381038	141.126	-268.912	-1.03332	-0.126298	-331.314	-2253.5	0	-930.971	-2026.99	-517.879		-6203.95	439.054	11.9305	9315.12			551.83	11553.9	-6755.78	-2238.74		551.83	278.857	12.053		-4210.9	-6755.78	156.227	0					11553.9	163.447
2055	551.83	278.857	12.053	11553.9	-36.9913	-5020.52	1830.08	156.227	0	6205.99		5.00413	0.00381038	141.126	-247.459	-1.03332	-0.126298	-309.861	-2164.6	0	-1045.19	-2168.98	-543.57		-6433.35	439.054	11.9305	9085.71			551.83	11553.9	-6985.18	-2468.14		551.83	278.857	12.053		-4272.63	-6985.18	156.227	0					11553.9	101.72
2056	551.83	278.857	12.053	11553.9	-509.107	-5136.2	1830.08	156.227	0	6205.99		5.00413	0.00381038	141.126	-226.006	-1.03332	-0.126298	-288.408	-1890.2	0	-822.408	-2239.34	-569.241		-6894.39	439.054	11.9305	8624.67			551.83	11553.9	-7446.22	-2929.18		551.83	278.857	12.053		-4637.64	-7446.22	156.227	0					11553.9	-263.291
2057	551.83	278.857	12.053	11553.9	-571.848	-5279.03	1830.08	156.227	0	6205.99		5.00413	0.00381038	141.126	-204.554	-1.03332	-0.126298	-266.956	-1737.07	0	-825.454	-2358.83	-594.893		-7248.14	439.054	11.9305	8270.92			551.83	11553.9	-7799.97	-3282.93		551.83	278.857	12.053		-4846.25	-7799.97	156.227	0					11553.9	-471.9
2058	551.83	278.857	12.053	11553.9	883.971	-5077	1830.08	156.227	0	6205.99		5.00413	0.00381038	141.126	-183.101	-1.03332	-0.126298	-245.503	-1989.44	0	-1735.8	-2801.47	-620.525		-6968.92	439.054	11.9305	8550.15			551.83	11553.9	-7520.75	-3003.71		551.83	278.857	12.053		-4098.75	-7520.75	156.227	0					11553.9	275.603
2059	551.83	278.857	12.053	11553.9	934.149	-5204.82	1830.08	156.227	0	6205.99		5.00413	0.00381038	141.126	-161.648	-1.03332	-0.126298	-224.05	-1777	0	-1675.52	-2955.07	-646.139		-7165.49	439.054	11.9305	8353.58			551.83	11553.9	-7717.32	-3200.28		551.83	278.857	12.053		-4116.11	-7717.32	156.227	0					11553.9	258.242
2060	551.83	278.857	12.053	11553.9	61.2125	-5319.72	1830.08	156.227	0	6205.99		5.00413	0.00381038	141.126	-140.195	-1.03332	-0.126298	-202.597	-1396.04	0	-1126.32	-2952.98	-671.732		-7627.64	439.054	11.9305	7891.43			551.83	11553.9	-8179.47	-3662.43		551.83	278.857	12.053		-4554.75	-8179.47	156.227	0					11553.9	-180.397
2061	551.83	278.857	12.053	11553.9	66.3294	-5340.71	1830.08	156.227	0	6205.99		5.00413	0.00381038	141.126	-118.742	-1.03332	-0.126298	-181.144	-1241.11	0	-1215.02	-3115.23	-697.568		-7920.29	439.054	11.9305	7598.77			551.83	11553.9	-8472.12	-3955.08		551.83	278.857	12.053		-4659.32	-8472.12	156.227	0					11553.9	-284.972
2062	551.83	278.857	12.053	11553.9	-100.958	-5411.71	1830.08	156.227	0	6205.99		5.00413	0.00381038	141.126	-97.2891	-1.03332	-0.126298	-159.691	-1024.01	0	-1106.83	-3192.55	-723.404		-8153.54	439.054	11.9305	7365.52			551.83	11553.9	-8705.37	-4188.33		551.83	278.857	12.053		-4789.42	-8705.37	156.227	0					11553.9	-415.069
2063	551.83	278.857	12.053	11553.9	-105.637	-5252.35	1830.08	156.227	0	6205.99		5.00413	0.00381038	141.126	-75.8362	-1.03332	-0.126298	-138.238	-865.561	0	-1235.33	-3387.99	-749.24		-8348.64	439.054	11.9305	7170.42			551.83	11553.9	-8900.47	-4383.43		551.83	278.857	12.053		-4763.24	-8900.47	156.227	0					11553.9	-388.888
2064	551.83	278.857	12.053	11553.9	-1048.41	-5224.25	1830.08	156.227	0	6205.99		5.00413	0.00381038	141.126	-54.3834	-1.03332	-0.126298	-116.785	-598.482	0	-753.874	-3386.58	-775.076		-8806.28	439.054	11.9305	6712.79			551.83	11553.9	-9358.11	-4841.07		551.83	278.857	12.053		-5196.45	-9358.11	156.227	0					11553.9	-822.099
2065	551.83	278.857	12.053	11553.9	-436.163	-5289.75	1830.08	156.227	0	6205.99		5.00413	0.00381038	141.126	-54.3834	-1.03332	-0.126298	-116.785	-671.146	0	-1159.16	-3646.53	-775.076		-8924.76	439.054	11.9305	6594.3			551.83	11553.9	-9476.59	-4959.55		551.83	278.857	12.053		-5054.99	-9476.59	156.227	0					11553.9	-680.638
2066	551.83	278.857	12.053	11553.9	-806.42	-5179.94	1830.08	156.227	0	6205.99		5.00413	0.00381038	141.126	-54.3834	-1.03332	-0.126298	-116.785	-660.963	0	-1083.89	-3588.48	-775.076		-9051.89	439.054	11.9305	6467.17			551.83	11553.9	-9603.72	-5086.68		551.83	278.857	12.053		-5240.17	-9603.72	156.227	0					11553.9	-865.819
2067	551.83	278.857	12.053	11553.9	-575.472	-5270.82	1830.08	156.227	0	6205.99		5.00413	0.00381038	141.126	-54.3834	-1.03332	-0.126298	-116.785	-685.896	0	-1212.11	-3660.94	-775.076		-9112.52	439.054	11.9305	6406.54			551.83	11553.9	-9664.35	-5147.31		551.83	278.857	12.053		-5228.33	-9664.35	156.227	0					11553.9	-853.98
2068	551.83	278.857	12.053	11553.9	1617.07	-5234.33	1830.08	156.227	0	6205.99		5.00413	0.00381038	141.126	-54.3834	-1.03332	-0.126298	-116.785	-898.496	0	-2484.84	-4292.3	-775.076		-8787.58	439.054	11.9305	6731.49			551.83	11553.9	-9339.41	-4822.37		551.83	278.857	12.053		-4272.03	-9339.41	156.227	0					11553.9	102.32
2069	551.83	278.857	12.053	11553.9	876.26	-5247.79	1830.08	156.227	0	6205.99		5.00413	0.00381038	141.126	-54.3834	-1.03332	-0.126298	-116.785	-817.382	0	-1886.72	-4139.02	-775.076		-8790.43	439.054	11.9305	6728.63			551.83	11553.9	-9342.26	-4825.22		551.83	278.857	12.053		-4428.17	-9342.26	156.227	0					11553.9	-53.8186
2070	551.83	278.857	12.053	11553.9	1933.32	-5332.45	1830.08	156.227	0	6205.99		5.00413	0.00381038	141.126	-54.3834	-1.03332	-0.126298	-116.785	-909.894	0	-2405.8	-4419.83	-775.076		-8617.93	439.054	11.9305	6901.13			551.83	11553.9	-9169.76	-4652.72		551.83	278.857	12.053		-3974.86	-9169.76	156.227	0					11553.9	399.496
2071	551.83	278.857	12.053	11553.9	484.012	-5462.54	1830.08	156.227	0	6205.99		5.00413	0.00381038	141.126	-54.3834	-1.03332	-0.126298	-116.785	-782.492	0	-1505.01	-4171.73	-775.076		-9048.45	439.054	11.9305	6470.62			551.83	11553.9	-9600.28	-5083.24		551.83	278.857	12.053		-4653.47	-9600.28	156.227	0					11553.9	-279.116
2072	551.83	278.857	12.053	11553.9	270.924	-5500.68	1830.08	156.227	0	6205.99		5.00413	0.00381038	141.126	-54.3834	-1.03332	-0.126298	-116.785	-769.213	0	-1418.06	-4073.61	-775.076		-9114.6	439.054	11.9305	6404.47			551.83	11553.9	-9666.43	-5149.39		551.83	278.857	12.053		-4817.74	-9666.43	156.227	0					11553.9	-443.393
2073	551.83	278.857	12.053	11553.9	79.6252	-5652.65	1830.08	156.227	0	6205.99		5.00413	0.00381038	141.126	-54.3834	-1.03332	-0.126298	-116.785	-758.176	0	-1292.29	-4091.53	-775.076		-9350.01	439.054	11.9305	6169.06			551.83	11553.9	-9901.84	-5384.8		551.83	278.857	12.053		-5035.23	-9901.84	156.227	0					11553.9	-660.882
2074	551.83	278.857	12.053	11553.9	1025.79	-5802.54	1830.08	156.227	0	6205.99		5.00413	0.00381038	141.126	-54.3834	-1.03332	-0.126298	-116.785	-839.444	0	-1754.27	-4343.6	-775.076		-9267.78	439.054	11.9305	6251.28			551.83	11553.9	-9819.61	-5302.57		551.83	278.857	12.053		-4700.94	-9819.61	156.227	0					11553.9	-326.589
2075	551.83	278.857	12.053	11553.9	1464.27	-5951.62	1830.08	156.227	0	6205.99		5.00413	0.00381038	141.126	-54.3834	-1.03332	-0.126298	-116.785	-883.894	0	-1992.52	-4461.45	-775.076		-9334.5	439.054	11.9305	6184.56			551.83	11553.9	-9886.33	-5369.29		551.83	278.857	12.053		-4649.8	-9886.33	156.227	0					11553.9	-275.446
2076	551.83	278.857	12.053	11553.9	2516.45	-6105.65	1830.08	156.227	0	6205.99		5.00413	0.00381038	141.126	-54.3834	-1.03332	-0.126298	-116.785	-961.119	0	-2403.29	-4721.55	-775.076		-9107.21	439.054	11.9305	6411.85			551.83	11553.9	-9659.04	-5142		551.83	278.857	12.053		-4162.41	-9659.04	156.227	0					11553.9	211.938
2077	551.83	278.857	12.053	11553.9	2026.06	-6263.91	1830.08	156.227	0	6205.99		5.00413	0.00381038	141.126	-54.3834	-1.03332	-0.126298	-116.785	-912.017	0	-2013.99	-4641.46	-775.076		-9286.47	439.054	11.9305	6232.6			551.83	11553.9	-9838.3	-5321.26		551.83	278.857	12.053		-4421.76	-9838.3	156.227	0					11553.9	-47.4138
2078	551.83	278.857	12.053	11553.9	1623.44	-6401.7	1830.08	156.227	0	6205.99		5.00413	0.00381038	141.126	-54.3834	-1.03332	-0.126298	-116.785	-888.88	0	-1801.79	-4620.36	-775.076		-9593.57	439.054	11.9305	5925.49			551.83	11553.9	-10145.4	-5628.36		551.83	278.857	12.053		-4749.97	-10145.4	156.227	0					11553.9	-375.62
2079	551.83	278.857	12.053	11553.9	1606.69	-6399.1	1830.08	156.227	0	6205.99		5.00413	0.00381038	141.126	-54.3834	-1.03332	-0.126298	-116.785	-898.489	0	-1777.54	-4731.4	-775.076		-9694.52	439.054	11.9305	5824.54			551.83	11553.9	-10246.3	-5729.31		551.83	278.857	12.053		-4739.88	-10246.3	156.227	0					11553.9	-365.524
2080	551.83	278.857	12.053	11553.9	1995.18	-6532.44	1830.08	156.227	0	6205.99		5.00413	0.00381038	141.126	-54.3834	-1.03332	-0.126298	-116.785	-941.08	0	-1996.05	-4859.58	-775.076		-9786.06	439.054	11.9305	5733			551.83	11553.9	-10337.9	-5820.85		551.83	278.857	12.053		-4703.24	-10337.9	156.227	0					11553.9	-328.888
2081	551.83	278.857	12.053	11553.9	2315.16	-6203.33	1830.08	156.227	0	6205.99		5.00413	0.00381038	141.126	-54.3834	-1.03332	-0.126298	-116.785	-992.196	0	-2233.64	-5068.99	-775.076		-9583.97	439.054	11.9305	5935.09			551.83	11553.9	-10135.8	-5618.76		551.83	278.857	12.053		-4291.74	-10135.8	156.227	0					11553.9	82.6136
2082	551.83	278.857	12.053	11553.9	1719.59	-6272.2	1830.08	156.227	0	6205.99		5.00413	0.00381038	141.126	-54.3834	-1.03332	-0.126298	-116.785	-941.962	0	-1853.29	-4961.8	-775.076		-9760.87	439.054	11.9305	5758.19			551.83	11553.9	-10312.7	-5795.66		551.83	278.857	12.053		-4575.82	-10312.7	156.227	0					11553.9	-201.474
2083	551.83	278.857	12.053	11553.9	1254.2	-6315.95	1830.08	156.227	0	6205.99		5.00413	0.00381038	141.126	-54.3834	-1.03332	-0.126298	-116.785	-912.452	0	-1604.11	-4925.27	-775.076		-9984.3	439.054	11.9305	5534.76			551.83	11553.9	-10536.1	-6019.09		551.83	278.857	12.053		-4835.79	-10536.1	156.227	0					11553.9	-461.434
2084	551.83	278.857	12.053	11553.9	1037.95	-6365.68	1830.08	156.227	0	6205.99		5.00413	0.00381038	141.126	-54.3834	-1.03332	-0.126298	-116.785	-893.857	0	-1433.21	-4909.88	-775.076		-10064	439.054	11.9305	5455.07			551.83	11553.9	-10615.8	-6098.78		551.83	278.857	12.053		-4930.86	-10615.8	156.227	0					11553.9	-556.514
2085	551.83	278.857	12.053	11553.9	2719.41	-6416.63	1830.08	156.227	0	6205.99		5.00413	0.00381038	141.126	-54.3834	-1.03332	-0.126298	-116.785	-1055.23	0	-2411.03	-5341.74	-775.076		-9843.16	439.054	11.9305	5675.91			551.83	11553.9	-10395	-5877.95		551.83	278.857	12.053		-4278.17	-10395	156.227	0					11553.9	96.1819
2086	551.83	278.857	12.053	11553.9	2689.13	-6113.35	1830.08	156.227	0	6205.99		5.00413	0.00381038	141.126	-54.3834	-1.03332	-0.126298	-116.785	-1059.76	0	-2356.67	-5407.09	-775.076		-9581.16	439.054	11.9305	5937.9			551.83	11553.9	-10133	-5615.95		551.83	278.857	12.053		-3950.82	-10133	156.227	0					11553.9	423.53
2087	551.83	278.857	12.053	11553.9	2354.86	-6115.58	1830.08	156.227	0	6205.99		5.00413	0.00381038	141.126	-54.3834	-1.03332	-0.126298	-116.785	-1024.26	0	-2053.3	-5364.13	-775.076		-9571.31	439.054	11.9305	5947.75			551.83	11553.9	-10123.1	-5606.1		551.83	278.857	12.053		-3983.94	-10123.1	156.227	0					11553.9	390.414
2088	551.83	278.857	12.053	11553.9	2073.92	-6103.64	1830.08	156.227	0	6205.99		5.00413	0.00381038	141.126	-54.3834	-1.03332	-0.126298	-116.785	-1004.74	0	-1868.09	-5342.31	-775.076		-9633.27	439.054	11.9305	5885.79			551.83	11553.9	-10185.1	-5668.07		551.83	278.857	12.053		-4067.72	-10185.1	156.227	0					11553.9	306.631
2089	551.83	278.857	12.053	11553.9	2274.41	-6115.27	1830.08	156.227	0	6205.99		5.00413	0.00381038	141.126	-54.3834	-1.03332	-0.126298	-116.785	-1035.04	0	-1988.03	-5476.47	-775.076		-9698.53	439.054	11.9305	5820.53			551.83	11553.9	-10250.4	-5733.32		551.83	278.857	12.053		-3998.81	-10250.4	156.227	0					11553.9	375.54
2090	551.83	278.857	12.053	11553.9	1894.34	-6091.25	1830.08	156.227	0	6205.99		5.00413	0.00381038	141.126	-54.3834	-1.03332	-0.126298	-116.785	-1002.24	0	-1724.89	-5411.47	-775.076		-9726.44	439.054	11.9305	5792.62			551.83	11553.9	-10278.3	-5761.23		551.83	278.857	12.053		-4091.72	-10278.3	156.227	0					11553.9	282.628
2091	551.83	278.857	12.053	11553.9	1781.78	-6055.21	1830.08	156.227	0	6205.99		5.00413	0.00381038	141.126	-54.3834	-1.03332	-0.126298	-116.785	-992.864	0	-1613.78	-5411.17	-775.076		-9691.55	439.054	11.9305	5827.52			551.83	11553.9	-10243.4	-5726.34		551.83	278.857	12.053		-4057.13	-10243.4	156.227	0					11553.9	317.222
2092	551.83	278.857	12.053	11553.9	2635.08	-6038.48	1830.08	156.227	0	6205.99		5.00413	0.00381038	141.126	-54.3834	-1.03332	-0.126298	-116.785	-1068.45	0	-2018.88	-5675.72	-775.076		-9491.16	439.054	11.9305	6027.9			551.83	11553.9	-10043	-5525.95		551.83	278.857	12.053		-3592.19	-10043	156.227	0					11553.9	782.158
2093	551.83	278.857	12.053	11553.9	2913.93	-5940.42	1830.08	156.227	0	6205.99		5.00413	0.00381038	141.126	-54.3834	-1.03332	-0.126298	-116.785	-1100.91	0	-2156.09	-5801.29	-775.076		-9377.04	439.054	11.9305	6142.02			551.83	11553.9	-9928.87	-5411.83		551.83	278.857	12.053		-3352.5	-9928.87	156.227	0					11553.9	1021.85
2094	551.83	278.857	12.053	11553.9	2061.28	-5936.99	1830.08	156.227	0	6205.99		5.00413	0.00381038	141.126	-54.3834	-1.03332	-0.126298	-116.785	-1017.26	0	-1585.98	-5569.05	-775.076		-9423.92	439.054	11.9305	6095.14			551.83	11553.9	-9975.75	-5458.71		551.83	278.857	12.053		-3631.62	-9975.75	156.227	0					11553.9	742.731
2095	551.83	278.857	12.053	11553.9	2160.7	-5894.9	1830.08	156.227	0	6205.99		5.00413	0.00381038	141.126	-54.3834	-1.03332	-0.126298	-116.785	-1028.43	0	-1596.47	-5644.56	-775.076		-9368.4	439.054	11.9305	6150.66			551.83	11553.9	-9920.23	-5403.19		551.83	278.857	12.053		-3500.59	-9920.23	156.227	0					11553.9	873.757
2096	551.83	278.857	12.053	11553.9	2675.25	-5732.53	1830.08	156.227	0	6205.99		5.00413	0.00381038	141.126	-54.3834	-1.03332	-0.126298	-116.785	-1095.72	0	-1957.3	-5872.25	-775.076		-9280	439.054	11.9305	6239.07			551.83	11553.9	-9831.83	-5314.79		551.83	278.857	12.053		-3184.5	-9831.83	156.227	0					11553.9	1189.85
2097	551.83	278.857	12.053	11553.9	2760.52	-5512.7	1830.08	156.227	0	6205.99		5.00413	0.00381038	141.126	-54.3834	-1.03332	-0.126298	-116.785	-1112	0	-1993.52	-5956.54	-775.076		-9095.41	439.054	11.9305	6423.65			551.83	11553.9	-9647.24	-5130.2		551.83	278.857	12.053		-2915.62	-9647.24	156.227	0					11553.9	1458.73
2098	551.83	278.857	12.053	11553.9	2754.64	-5389.45	1830.08	156.227	0	6205.99		5.00413	0.00381038	141.126	-54.3834	-1.03332	-0.126298	-116.785	-1114.11	0	-1951.74	-5979.43	-775.076		-8959.15	439.054	11.9305	6559.92			551.83	11553.9	-9510.98	-4993.94		551.83	278.857	12.053		-2756.47	-9510.98	156.227	0					11553.9	1617.88
2099	551.83	278.857	12.053	11553.9	1454.26	-5295.23	1830.08	156.227	0	6205.99		5.00413	0.00381038	141.126	-54.3834	-1.03332	-0.126298	-116.785	-1003.88	0	-1189.08	-5737.92	-775.076		-9161.15	439.054	11.9305	6357.91			551.83	11553.9	-9712.98	-5195.94		551.83	278.857	12.053		-3199.99	-9712.98	156.227	0					11553.9	1174.37
2100	551.83	278.857	12.053	11553.9	663.604	-5249.65	1830.08	156.227	0	6205.99		5.00413	0.00381038	141.126	-54.3834	-1.03332	-0.126298	-116.785	-918.586	0	-615.09	-5534.02	-775.076		-9128.33	439.054	11.9305	6390.74			551.83	11553.9	-9680.16	-5163.12		551.83	278.857	12.053		-3371.06	-9680.16	156.227	0					11553.9	1003.29
[truncated: 8 more columns]

## Sheet: S3a-CN
AFOLU emissions time series for CN with no climate neutrality constraint
Units: kt per annuam
Year																									Sc-3a
	Agriculture				Forest-old	Afforestation	Other land use				AD-Ag				AD-subtitutions				Wood-substitutions	LUC					AGGREGATION						AG		LULUCF			AGRICULTURE				LULUCF
	CO2	CH4	N2O	CO2e	CO2e	CO2e	CO2	CH4	N2O	CO2e	CO2	CH4	N2O	CO2e	CO2	CH4	N2O	CO2e	CO2e	CO2e	HWP	CCS-wood	CCS-AD		CO2	CH4	N2O	CO2e			CO2	CO2e	CO2	CO2e		CO2	CH4	N2O		CO2 ex BECCS	CO2 inc. BECCS	CH4	N2O
2020	515.052	519.844	27.5299	22366.1	-2082.32	0	3890	130	0.029	7537.69		0	0	0	0	0	0	0		0	-809.02				1513.71	649.844	27.5589	27012.5			515.052	22366.1	998.658	4646.34		515.052	519.844	27.5299		998.658	998.658	130	0.029
2021	515.052	519.844	27.5299	22366.1	-1440.38	0	2745	134	0.029	6504.69		0	0	0	0	0	0	0		0	-963				856.672	653.844	27.5589	26467.4			515.052	22366.1	341.62	4101.31		515.052	519.844	27.5299		341.62	341.62	134	0.029
2022	515.052	519.844	27.5299	22366.1	-1879	0	1934	139	0.029	5813		0	0	0	0	0	0	0		0	-866				-295.948	658.844	27.5589	25434.1			515.052	22366.1	-811	3068		515.052	519.844	27.5299		-811	-811	139	0.029
2023	510.807	508.561	26.9224	21885	1080.78	0	1758	140.7	0.029	5525.93		0	0	0	0	0	0	0		0	-1985.5				1364.09	649.261	26.9514	26506.2			510.807	21885	853.284	4621.22		510.807	508.561	26.9224		853.284	853.284	140.7	0.029
2024	506.562	497.278	26.315	21403.8	-1157.5	-5.43233	1582	142.4	0.029	5238.86		0	0	0	0	0	0	0	-3272.49	0	-1235.56	0			-309.931	639.678	26.344	24244.2			506.562	21403.8	-816.494	2840.37		506.562	497.278	26.315		-816.494	-816.494	142.4	0.029
2025	502.318	485.995	25.7075	20922.7	800.055	-15.8877	1406	144.1	0.029	4951.79		1.46832	0.0462421	53.3671	-127.49	0	0	-127.49	-4780.72	0	-2145.47	0	0		547.011	631.563	25.7827	24566.5			502.318	20922.7	44.6933	3643.85		502.318	485.995	25.7075		44.6933	44.6933	144.1	0.029
2026	498.073	474.712	25.1	20441.5	415.773	-36.9017	1230	145.8	0.029	4664.73		2.17563	0.0377558	70.9228	-388.642	-0.206665	-0.0252596	-401.122	-4196.51	0	-1662.7	0	0		444.25	622.481	25.1415	23893.3			498.073	20441.5	-53.8237	3451.83		498.073	474.712	25.1		-53.8237	-53.8237	145.8	0.029
2027	493.829	463.429	24.4925	19960.4	320.294	-68.0354	1054	147.5	0.029	4377.66		2.88277	0.0292694	88.474	-649.766	-0.413329	-0.0505192	-674.726	-4234.96	0	-1679.65	0	0		120.438	613.398	24.5003	22999.1			493.829	19960.4	-373.391	3038.74		493.829	463.429	24.4925		-373.391	-373.391	147.5	0.029
2028	489.584	452.146	23.885	19479.2	615.799	-109.293	878	149.2	0.029	4090.59		3.5899	0.0207831	106.025	-910.886	-0.619994	-0.0757788	-948.327	-4166.54	0	-1592.62	0	0		281.469	604.316	23.859	22589.7			489.584	19479.2	-208.115	3110.5		489.584	452.146	23.885		-208.115	-208.115	149.2	0.029
2029	485.339	440.863	23.2776	18998.1	927.138	-160.487	702	150.9	0.029	3803.52		4.29702	0.0122967	123.575	-1172	-0.826658	-0.101038	-1221.93	-4482.33	0	-1796.93	0	0		157.062	595.233	23.2178	21894.9			485.339	18998.1	-328.277	2896.82		485.339	440.863	23.2776		-328.277	-328.277	150.9	0.029
2030	481.095	429.58	22.6701	18516.9	1691.52	-221.309	526	147	0.029	4667		5.00413	0.00381038	141.126	-1433.12	-1.03332	-0.126298	-1495.53	-5454.2	590	-1956.5	0	0		1110.81	580.551	22.5766	23428.7			481.095	18516.9	629.72	4911.85		481.095	429.58	22.6701		39.7201	39.7201	147	0.029
2031	476.85	418.297	22.0626	18035.7	2843.65	-288.237	568.254	147.59	0.02755	4724.6		5.00413	0.00381038	141.126	-1433.12	-1.03332	-0.126298	-1495.53	-5328.05	590	-1811.06	0	0		2379.45	569.857	21.9677	24235.8			476.85	18035.7	1902.6	6200.07		476.85	418.297	22.0626		1312.6	1312.6	147.59	0.02755
2032	472.605	407.014	21.4551	17554.6	3437.85	-363.027	610.508	148.18	0.0261	4782.19		5.00413	0.00381038	141.126	-1433.12	-1.03332	-0.126298	-1495.53	-5121	590	-1634.58	0	0		3113.36	559.164	21.3587	24508.2			472.605	17554.6	2640.75	6953.56		472.605	407.014	21.4551		2050.75	2050.75	148.18	0.0261
2033	468.361	395.731	20.8476	17073.4	3515.02	-451.133	652.763	148.769	0.02465	4839.79		5.00413	0.00381038	141.126	-1433.12	-1.03332	-0.126298	-1495.53	-5609.4	590	-1899.98	0	0		2875.03	548.471	20.7498	23808.3			468.361	17073.4	2406.67	6734.82		468.361	395.731	20.8476		1816.67	1816.67	148.769	0.02465
2034	464.116	384.448	20.2402	16592.3	5726.2	-543.677	695.017	149.359	0.0232	4897.38		5.00413	0.00381038	141.126	-1433.12	-1.03332	-0.126298	-1495.53	-6417.5	590	-2314.34	0	0		4617.32	537.777	20.1409	25089			464.116	16592.3	4153.2	8496.69		464.116	384.448	20.2402		3563.2	3563.2	149.359	0.0232
2035	459.872	373.164	19.6327	16111.1	4854.33	-651.59	737.271	149.949	0.02175	4954.98		5.00413	0.00381038	141.126	-1433.12	-1.03332	-0.126298	-1495.53	-5525.09	590	-1811.88	-85.3782	0		4092.63	527.084	19.5319	24102.7			459.872	16111.1	3632.76	7991.59		459.872	373.164	19.6327		3128.13	3042.76	149.949	0.02175
2036	455.627	361.881	19.0252	15630	4809.23	-760.329	779.525	150.539	0.0203	5012.57		5.00413	0.00381038	141.126	-1433.12	-1.03332	-0.126298	-1495.53	-5410.17	590	-1778.7	-175.628	0		3919.72	516.391	18.923	23468.3			455.627	15630	3464.1	7838.27		455.627	361.881	19.0252		3049.72	2874.1	150.539	0.0203
2037	451.382	350.598	18.4177	15148.8	5262.7	-871.895	821.78	151.128	0.01885	5070.17		5.00413	0.00381038	141.126	-1433.12	-1.03332	-0.126298	-1495.53	-5506.61	590	-1919.96	-271.93	0		4062.08	505.697	18.3141	23149			451.382	15148.8	3610.69	8000.21		451.382	350.598	18.4177		3292.62	3020.69	151.128	0.01885
2038	447.138	339.315	17.8102	14667.7	4646.11	-979.518	864.034	151.718	0.0174	5127.76		5.00413	0.00381038	141.126	-1433.12	-1.03332	-0.126298	-1495.53	-4905.29	590	-1545.2	-353.942	0		3668.62	495.004	17.7052	22294			447.138	14667.7	3221.48	7626.34		447.138	339.315	17.8102		2985.42	2631.48	151.718	0.0174
2039	442.893	328.032	17.2028	14186.5	4116.6	-1091.25	906.288	152.308	0.01595	5185.36		5.00413	0.00381038	141.126	-1433.12	-1.03332	-0.126298	-1495.53	-4812.65	590	-1531.85	-457.253	0		2975.43	484.311	17.0962	21139.3			442.893	14186.5	2532.54	6952.74		442.893	328.032	17.2028		2399.79	1942.54	152.308	0.01595
2040	438.649	316.749	16.5953	13705.4	2370.95	-1215.88	948.542	152.898	0.0145	5242.96		5.00413	0.00381038	141.126	-569.253	-1.03332	-0.126298	-631.655	-4111.91	590	-1087.71	-515.322	-156.177		1373.05	473.618	16.4873	19075.3			438.649	13705.4	934.403	5369.94		438.649	316.749	16.5953		1015.9	344.403	152.898	0.0145
2041	434.404	305.466	15.9878	13224.2	3673.08	-1333.78	990.797	153.487	0.01305	5300.55		5.00413	0.00381038	141.126	-547.8	-1.03332	-0.126298	-610.202	-5304.81	590	-2102.12	-719.59	-182.139		1350.65	462.924	15.8784	18591.3			434.404	13224.2	916.243	5367.12		434.404	305.466	15.9878		1227.97	326.243	153.487	0.01305
2042	430.159	294.183	15.3803	12743.1	2475.5	-1447.8	1033.05	154.077	0.0116	5358.15		5.00413	0.00381038	141.126	-526.347	-1.03332	-0.126298	-588.749	-4447.93	590	-1495.34	-770.3	-208.081		607.192	452.231	15.2694	17386.3			430.159	12743.1	177.032	4643.25		430.159	294.183	15.3803		565.413	-412.968	154.077	0.0116
2043	425.915	282.9	14.7728	12261.9	1833.91	-1554.22	1075.31	154.667	0.01015	5415.74		5.00413	0.00381038	141.126	-504.894	-1.03332	-0.126298	-567.296	-3991.91	590	-1202.73	-846.231	-234.004		87.94	441.538	14.6605	16405.5			425.915	12261.9	-337.975	4143.59		425.915	282.9	14.7728		152.26	-927.975	154.667	0.01015
2044	421.67	271.617	14.1654	11780.8	1876.93	-1668.64	1117.56	155.257	0.0087	5473.34		5.00413	0.00381038	141.126	-483.441	-1.03332	-0.126298	-545.843	-3696.44	590	-1113.62	-886.072	-259.908		77.9247	430.844	14.0516	15933.9			421.67	11780.8	-343.745	4153.16		421.67	271.617	14.1654		212.234	-933.745	155.257	0.0087
2045	417.425	260.334	13.5579	11299.6	1691.82	-1776.33	1159.81	155.846	0.00725	5530.93		5.00413	0.00381038	141.126	-461.988	-1.03332	-0.126298	-524.39	-3350.46	590	-912.446	-947.432	-285.792		-62.9421	420.151	13.4427	15331.5			417.425	11299.6	-480.368	4031.88		417.425	260.334	13.5579		162.856	-1070.37	155.846	0.00725
2046	413.181	249.051	12.9504	10818.5	1582.75	-1881	1202.07	156.436	0.0058	5588.53		5.00413	0.00381038	141.126	-440.535	-1.03332	-0.126298	-502.937	-3231.26	590	-899.059	-1057	-311.657		-360.724	409.458	12.8337	14572.1			413.181	10818.5	-773.905	3753.68		413.181	249.051	12.9504		4.75633	-1363.9	156.436	0.0058
2047	408.936	237.768	12.3429	10337.3	1573.34	-1983.64	1244.32	157.026	0.00435	5646.13		5.00413	0.00381038	141.126	-419.082	-1.03332	-0.126298	-481.484	-3550.57	590	-1328.28	-1264.04	-337.503		-1096.85	398.765	12.2248	13374.5			408.936	10337.3	-1505.79	3037.14		408.936	237.768	12.3429		-494.251	-2095.79	157.026	0.00435
2048	404.692	226.485	11.7355	9856.16	2046.14	-2077.9	1286.58	157.616	0.0029	5703.72		5.00413	0.00381038	141.126	-397.63	-1.03332	-0.126298	-460.032	-3413.86	590	-1335.67	-1372.28	-363.329		-821.763	388.071	11.6159	13188			404.692	9856.16	-1226.45	3331.82		404.692	226.485	11.7355		-80.8469	-1816.45	157.616	0.0029
2049	400.447	215.202	11.128	9375.01	1406.12	-2174.56	1328.83	158.205	0.00145	5761.32		5.00413	0.00381038	141.126	-376.177	-1.03332	-0.126298	-438.579	-3015.6	590	-1002.71	-1466.15	-389.136		-1307.16	377.378	11.0069	12241			400.447	9375.01	-1707.6	2866.01		400.447	215.202	11.128		-442.321	-2297.6	158.205	0.00145
2050	396.202	203.919	10.5205	8893.86	2056.63	-2254.54	1371.08	158.795	0	5818.91		5.00413	0.00381038	141.126	-354.724	-1.03332	-0.126298	-417.126	-2926.11	0	-1114.73	-1536.89	-414.923		-1497.16	366.685	10.398	11589.4			396.202	8893.86	-1893.36	2695.59		396.202	203.919	10.5205		58.4468	-1893.36	158.795	0
2051	396.202	203.919	10.5205	8893.86	1513.14	-2346.77	1371.08	158.795	0	5818.91		5.00413	0.00381038	141.126	-333.271	-1.03332	-0.126298	-395.673	-2967.1	0	-1385.17	-1666.46	-440.691		-2558.67	366.685	10.398	10527.9			396.202	8893.86	-2954.87	1634.08		396.202	203.919	10.5205		-847.716	-2954.87	158.795	0
2052	396.202	203.919	10.5205	8893.86	136.204	-2438.13	1371.08	158.795	0	5818.91		5.00413	0.00381038	141.126	-311.818	-1.03332	-0.126298	-374.22	-2226.86	0	-584.172	-1579.46	-466.44		-3164.71	366.685	10.398	9921.9			396.202	8893.86	-3560.91	1028.05		396.202	203.919	10.5205		-1515.01	-3560.91	158.795	0
2053	396.202	203.919	10.5205	8893.86	110.359	-2517.75	1371.08	158.795	0	5818.91		5.00413	0.00381038	141.126	-290.365	-1.03332	-0.126298	-352.767	-2122.7	0	-625.183	-1690.68	-492.169		-3448.14	366.685	10.398	9638.46			396.202	8893.86	-3844.34	744.608		396.202	203.919	10.5205		-1661.49	-3844.34	158.795	0
2054	396.202	203.919	10.5205	8893.86	-53.9678	-2600.59	1371.08	158.795	0	5818.91		5.00413	0.00381038	141.126	-268.912	-1.03332	-0.126298	-331.314	-1951.05	0	-572.481	-1771.46	-517.879		-3749.08	366.685	10.398	9337.52			396.202	8893.86	-4145.29	443.665		396.202	203.919	10.5205		-1855.95	-4145.29	158.795	0
2055	396.202	203.919	10.5205	8893.86	-36.9913	-2473.27	1371.08	158.795	0	5818.91		5.00413	0.00381038	141.126	-247.459	-1.03332	-0.126298	-309.861	-1885.69	0	-691.799	-1907.92	-543.57		-3886.26	366.685	10.398	9200.35			396.202	8893.86	-4282.46	306.494		396.202	203.919	10.5205		-1830.97	-4282.46	158.795	0
2056	396.202	203.919	10.5205	8893.86	-509.107	-2457	1371.08	158.795	0	5818.91		5.00413	0.00381038	141.126	-226.006	-1.03332	-0.126298	-288.408	-1633.99	0	-489.962	-1947.67	-569.241		-4205.69	366.685	10.398	8880.91			396.202	8893.86	-4601.9	-12.9439		396.202	203.919	10.5205		-2084.98	-4601.9	158.795	0
2057	396.202	203.919	10.5205	8893.86	-571.848	-2488.96	1371.08	158.795	0	5818.91		5.00413	0.00381038	141.126	-204.554	-1.03332	-0.126298	-266.956	-1499.21	0	-494.457	-2047.76	-594.893		-4430.63	366.685	10.398	8655.98			396.202	8893.86	-4826.83	-237.878		396.202	203.919	10.5205		-2184.18	-4826.83	158.795	0
2058	396.202	203.919	10.5205	8893.86	883.971	-2467	1371.08	158.795	0	5818.91		5.00413	0.00381038	141.126	-183.101	-1.03332	-0.126298	-245.503	-1704.67	0	-1260.08	-2417.15	-620.525		-4113.49	366.685	10.398	8973.12			396.202	8893.86	-4509.69	79.2627		396.202	203.919	10.5205		-1472.02	-4509.69	158.795	0
2059	396.202	203.919	10.5205	8893.86	934.149	-2502.41	1371.08	158.795	0	5818.91		5.00413	0.00381038	141.126	-161.648	-1.03332	-0.126298	-224.05	-1519.59	0	-1216.39	-2529.89	-646.139		-4193.39	366.685	10.398	8893.22			396.202	8893.86	-4589.59	-0.636045		396.202	203.919	10.5205		-1413.56	-4589.59	158.795	0
2060	396.202	203.919	10.5205	8893.86	61.2125	-2544.48	1371.08	158.795	0	5818.91		5.00413	0.00381038	141.126	-140.195	-1.03332	-0.126298	-202.597	-1158.43	0	-669.757	-2458.76	-671.732		-4516.23	366.685	10.398	8570.37			396.202	8893.86	-4912.43	-323.482		396.202	203.919	10.5205		-1781.94	-4912.43	158.795	0
2061	396.202	203.919	10.5205	8893.86	66.3294	-2482.4	1371.08	158.795	0	5818.91		5.00413	0.00381038	141.126	-118.742	-1.03332	-0.126298	-181.144	-1034.16	0	-764.369	-2598.23	-697.568		-4708.94	366.685	10.398	8377.66			396.202	8893.86	-5105.15	-516.194		396.202	203.919	10.5205		-1809.35	-5105.15	158.795	0
2062	396.202	203.919	10.5205	8893.86	-100.958	-2511.55	1371.08	158.795	0	5818.91		5.00413	0.00381038	141.126	-97.2891	-1.03332	-0.126298	-159.691	-845.979	0	-636.688	-2679.37	-723.404		-4884.68	366.685	10.398	8201.92			396.202	8893.86	-5280.89	-691.933		396.202	203.919	10.5205		-1878.12	-5280.89	158.795	0
2063	396.202	203.919	10.5205	8893.86	-105.637	-2465.41	1371.08	158.795	0	5818.91		5.00413	0.00381038	141.126	-75.8362	-1.03332	-0.126298	-138.238	-697.967	0	-667.298	-2807.88	-749.24		-5028.18	366.685	10.398	8058.43			396.202	8893.86	-5424.38	-835.426		396.202	203.919	10.5205		-1867.26	-5424.38	158.795	0
2064	396.202	203.919	10.5205	8893.86	-1048.41	-2504.37	1371.08	158.795	0	5818.91		5.00413	0.00381038	141.126	-54.3834	-1.03332	-0.126298	-116.785	-454.865	0	-127.688	-2706.08	-775.076		-5394.33	366.685	10.398	7692.28			396.202	8893.86	-5790.53	-1201.58		396.202	203.919	10.5205		-2309.37	-5790.53	158.795	0
2065	396.202	203.919	10.5205	8893.86	-436.163	-2424.58	1371.08	158.795	0	5818.91		5.00413	0.00381038	141.126	-54.3834	-1.03332	-0.126298	-116.785	-528.182	0	-580.804	-2909.85	-775.076		-5359.19	366.685	10.398	7727.42			396.202	8893.86	-5755.39	-1166.44		396.202	203.919	10.5205		-2070.46	-5755.39	158.795	0
2066	396.202	203.919	10.5205	8893.86	-806.42	-2468.21	1371.08	158.795	0	5818.91		5.00413	0.00381038	141.126	-54.3834	-1.03332	-0.126298	-116.785	-500.409	0	-392.837	-2837.13	-775.076		-5512.39	366.685	10.398	7574.22			396.202	8893.86	-5908.59	-1319.64		396.202	203.919	10.5205		-2296.39	-5908.59	158.795	0
2067	396.202	203.919	10.5205	8893.86	-575.472	-2389.9	1371.08	158.795	0	5818.91		5.00413	0.00381038	141.126	-54.3834	-1.03332	-0.126298	-116.785	-533.706	0	-590.952	-2929.7	-775.076		-5493.81	366.685	10.398	7592.8			396.202	8893.86	-5890.01	-1301.06		396.202	203.919	10.5205		-2185.24	-5890.01	158.795	0
2068	396.202	203.919	10.5205	8893.86	1617.07	-2417.81	1371.08	158.795	0	5818.91		5.00413	0.00381038	141.126	-54.3834	-1.03332	-0.126298	-116.785	-725.966	0	-1784.6	-3439.18	-775.076		-5032.31	366.685	10.398	8054.29			396.202	8893.86	-5428.52	-839.564		396.202	203.919	10.5205		-1214.26	-5428.52	158.795	0
2069	396.202	203.919	10.5205	8893.86	876.26	-2401.75	1371.08	158.795	0	5818.91		5.00413	0.00381038	141.126	-54.3834	-1.03332	-0.126298	-116.785	-638.801	0	-1170.47	-3258.98	-775.076		-4962.73	366.685	10.398	8123.88			396.202	8893.86	-5358.93	-769.981		396.202	203.919	10.5205		-1324.88	-5358.93	158.795	0
2070	396.202	203.919	10.5205	8893.86	1933.32	-2436.85	1371.08	158.795	0	5818.91		5.00413	0.00381038	141.126	-54.3834	-1.03332	-0.126298	-116.785	-726.127	0	-1686.45	-3500.95	-775.076		-4698.72	366.685	10.398	8387.89			396.202	8893.86	-5094.92	-505.968		396.202	203.919	10.5205		-818.891	-5094.92	158.795	0
2071	396.202	203.919	10.5205	8893.86	484.012	-2489.99	1371.08	158.795	0	5818.91		5.00413	0.00381038	141.126	-54.3834	-1.03332	-0.126298	-116.785	-592.406	0	-795.354	-3171.28	-775.076		-4980.4	366.685	10.398	8106.21			396.202	8893.86	-5376.6	-787.645		396.202	203.919	10.5205		-1430.25	-5376.6	158.795	0
2072	396.202	203.919	10.5205	8893.86	270.924	-2547.39	1371.08	158.795	0	5818.91		5.00413	0.00381038	141.126	-54.3834	-1.03332	-0.126298	-116.785	-576.102	0	-664.247	-3149.11	-775.076		-5097.61	366.685	10.398	7988.99			396.202	8893.86	-5493.82	-904.863		396.202	203.919	10.5205		-1569.63	-5493.82	158.795	0
2073	396.202	203.919	10.5205	8893.86	79.6252	-2606.9	1371.08	158.795	0	5818.91		5.00413	0.00381038	141.126	-54.3834	-1.03332	-0.126298	-116.785	-561.255	0	-548.158	-3125.27	-775.076		-5208.49	366.685	10.398	7878.12			396.202	8893.86	-5604.69	-1015.74		396.202	203.919	10.5205		-1704.34	-5604.69	158.795	0
2074	396.202	203.919	10.5205	8893.86	1025.79	-2670.49	1371.08	158.795	0	5818.91		5.00413	0.00381038	141.126	-54.3834	-1.03332	-0.126298	-116.785	-639.161	0	-1018.43	-3344.71	-775.076		-5015.62	366.685	10.398	8070.98			396.202	8893.86	-5411.83	-822.874		396.202	203.919	10.5205		-1292.04	-5411.83	158.795	0
2075	396.202	203.919	10.5205	8893.86	1464.27	-2733.1	1371.08	158.795	0	5818.91		5.00413	0.00381038	141.126	-54.3834	-1.03332	-0.126298	-116.785	-682.978	0	-1265.96	-3469.09	-775.076		-5011.67	366.685	10.398	8074.93			396.202	8893.86	-5407.88	-818.923		396.202	203.919	10.5205		-1163.71	-5407.88	158.795	0
2076	396.202	203.919	10.5205	8893.86	2516.45	-2798.79	1371.08	158.795	0	5818.91		5.00413	0.00381038	141.126	-54.3834	-1.03332	-0.126298	-116.785	-756.076	0	-1684.64	-3684.8	-775.076		-4659.58	366.685	10.398	8427.03			396.202	8893.86	-5055.78	-466.826		396.202	203.919	10.5205		-595.899	-5055.78	158.795	0
2077	396.202	203.919	10.5205	8893.86	2026.06	-2864.74	1371.08	158.795	0	5818.91		5.00413	0.00381038	141.126	-54.3834	-1.03332	-0.126298	-116.785	-704.321	0	-1304.6	-3579.69	-775.076		-4730.76	366.685	10.398	8355.85			396.202	8893.86	-5126.96	-538.005		396.202	203.919	10.5205		-772.193	-5126.96	158.795	0
2078	396.202	203.919	10.5205	8893.86	1623.44	-2930.76	1371.08	158.795	0	5818.91		5.00413	0.00381038	141.126	-54.3834	-1.03332	-0.126298	-116.785	-677.032	0	-1091.74	-3530.12	-775.076		-4936.97	366.685	10.398	8149.64			396.202	8893.86	-5333.17	-744.219		396.202	203.919	10.5205		-1027.97	-5333.17	158.795	0
2079	396.202	203.919	10.5205	8893.86	1606.69	-2885.11	1371.08	158.795	0	5818.91		5.00413	0.00381038	141.126	-54.3834	-1.03332	-0.126298	-116.785	-676.963	0	-1051.38	-3559.57	-775.076		-4897.16	366.685	10.398	8189.44			396.202	8893.86	-5293.37	-704.412		396.202	203.919	10.5205		-958.723	-5293.37	158.795	0
2080	396.202	203.919	10.5205	8893.86	1995.18	-2935.96	1371.08	158.795	0	5818.91		5.00413	0.00381038	141.126	-54.3834	-1.03332	-0.126298	-116.785	-717.952	0	-1277.12	-3683.08	-775.076		-4908.77	366.685	10.398	8177.84			396.202	8893.86	-5304.97	-716.022		396.202	203.919	10.5205		-846.819	-5304.97	158.795	0
2081	396.202	203.919	10.5205	8893.86	2315.16	-2890.1	1371.08	158.795	0	5818.91		5.00413	0.00381038	141.126	-54.3834	-1.03332	-0.126298	-116.785	-734.412	0	-1336.96	-3754.81	-775.076		-4674.49	366.685	10.398	8412.11			396.202	8893.86	-5070.7	-481.744		396.202	203.919	10.5205		-540.81	-5070.7	158.795	0
2082	396.202	203.919	10.5205	8893.86	1719.59	-2933.32	1371.08	158.795	0	5818.91		5.00413	0.00381038	141.126	-54.3834	-1.03332	-0.126298	-116.785	-682.843	0	-972.769	-3637.23	-775.076		-4831.52	366.685	10.398	8255.09			396.202	8893.86	-5227.72	-638.77		396.202	203.919	10.5205		-815.421	-5227.72	158.795	0
2083	396.202	203.919	10.5205	8893.86	1254.2	-2982.07	1371.08	158.795	0	5818.91		5.00413	0.00381038	141.126	-54.3834	-1.03332	-0.126298	-116.785	-648.721	0	-731.034	-3557.09	-775.076		-5023.79	366.685	10.398	8062.81			396.202	8893.86	-5420	-831.042		396.202	203.919	10.5205		-1087.83	-5420	158.795	0
2084	396.202	203.919	10.5205	8893.86	1037.95	-3029.71	1371.08	158.795	0	5818.91		5.00413	0.00381038	141.126	-54.3834	-1.03332	-0.126298	-116.785	-627.405	0	-572.741	-3516.18	-775.076		-5088.48	366.685	10.398	7998.13			396.202	8893.86	-5484.68	-895.725		396.202	203.919	10.5205		-1193.42	-5484.68	158.795	0
2085	396.202	203.919	10.5205	8893.86	2719.41	-3076.71	1371.08	158.795	0	5818.91		5.00413	0.00381038	141.126	-54.3834	-1.03332	-0.126298	-116.785	-787.583	0	-1565.55	-3940.45	-775.076		-4871.09	366.685	10.398	8215.52			396.202	8893.86	-5267.29	-678.337		396.202	203.919	10.5205		-551.764	-5267.29	158.795	0
2086	396.202	203.919	10.5205	8893.86	2689.13	-3133.92	1371.08	158.795	0	5818.91		5.00413	0.00381038	141.126	-54.3834	-1.03332	-0.126298	-116.785	-759.891	0	-1336.98	-3903.91	-775.076		-4693.47	366.685	10.398	8393.14			396.202	8893.86	-5089.67	-500.717		396.202	203.919	10.5205		-410.687	-5089.67	158.795	0
2087	396.202	203.919	10.5205	8893.86	2354.86	-3190.76	1371.08	158.795	0	5818.91		5.00413	0.00381038	141.126	-54.3834	-1.03332	-0.126298	-116.785	-721.152	0	-1051.55	-3823.87	-775.076		-4719.1	366.685	10.398	8367.5			396.202	8893.86	-5115.31	-526.353		396.202	203.919	10.5205		-516.362	-5115.31	158.795	0
2088	396.202	203.919	10.5205	8893.86	2073.92	-3248.73	1371.08	158.795	0	5818.91		5.00413	0.00381038	141.126	-54.3834	-1.03332	-0.126298	-116.785	-698.723	0	-876.074	-3785.4	-775.076		-4844.08	366.685	10.398	8242.53			396.202	8893.86	-5240.28	-651.327		396.202	203.919	10.5205		-679.8	-5240.28	158.795	0
2089	396.202	203.919	10.5205	8893.86	2274.41	-3254.87	1371.08	158.795	0	5818.91		5.00413	0.00381038	141.126	-54.3834	-1.03332	-0.126298	-116.785	-729.314	0	-1043.98	-3874.64	-775.076		-4906.87	366.685	10.398	8179.74			396.202	8893.86	-5303.07	-714.121		396.202	203.919	10.5205		-653.354	-5303.07	158.795	0
2090	396.202	203.919	10.5205	8893.86	1894.34	-3303.57	1371.08	158.795	0	5818.91		5.00413	0.00381038	141.126	-54.3834	-1.03332	-0.126298	-116.785	-696.176	0	-799.97	-3810.7	-775.076		-5027.69	366.685	10.398	8058.91			396.202	8893.86	-5423.9	-834.944		396.202	203.919	10.5205		-838.116	-5423.9	158.795	0
2091	396.202	203.919	10.5205	8893.86	1781.78	-3204.13	1371.08	158.795	0	5818.91		5.00413	0.00381038	141.126	-54.3834	-1.03332	-0.126298	-116.785	-695.341	0	-768.458	-3824.47	-775.076		-5023.07	366.685	10.398	8063.53			396.202	8893.86	-5419.28	-830.324		396.202	203.919	10.5205		-819.727	-5419.28	158.795	0
2092	396.202	203.919	10.5205	8893.86	2635.08	-3217.91	1371.08	158.795	0	5818.91		5.00413	0.00381038	141.126	-54.3834	-1.03332	-0.126298	-116.785	-767.247	0	-1195.26	-4029.25	-775.076		-4815.13	366.685	10.398	8271.48			396.202	8893.86	-5211.33	-622.38		396.202	203.919	10.5205		-407.008	-5211.33	158.795	0
2093	396.202	203.919	10.5205	8893.86	2913.93	-3136.38	1371.08	158.795	0	5818.91		5.00413	0.00381038	141.126	-54.3834	-1.03332	-0.126298	-116.785	-799.814	0	-1363.36	-4133.14	-775.076		-4726.74	366.685	10.398	8359.87			396.202	8893.86	-5122.94	-533.985		396.202	203.919	10.5205		-214.721	-5122.94	158.795	0
2094	396.202	203.919	10.5205	8893.86	2061.28	-3160.52	1371.08	158.795	0	5818.91		5.00413	0.00381038	141.126	-54.3834	-1.03332	-0.126298	-116.785	-719.188	0	-816.518	-3937.6	-775.076		-4861.15	366.685	10.398	8225.46			396.202	8893.86	-5257.35	-668.402		396.202	203.919	10.5205		-544.677	-5257.35	158.795	0
2095	396.202	203.919	10.5205	8893.86	2160.7	-3193.39	1371.08	158.795	0	5818.91		5.00413	0.00381038	141.126	-54.3834	-1.03332	-0.126298	-116.785	-728.087	0	-845.74	-3977.03	-775.076		-4863.25	366.685	10.398	8223.35			396.202	8893.86	-5259.46	-670.503		396.202	203.919	10.5205		-507.346	-5259.46	158.795	0
2096	396.202	203.919	10.5205	8893.86	2675.25	-3236.54	1371.08	158.795	0	5818.91		5.00413	0.00381038	141.126	-54.3834	-1.03332	-0.126298	-116.785	-779.327	0	-1144.58	-4119.7	-775.076		-4833.36	366.685	10.398	8253.25			396.202	8893.86	-5229.56	-640.608		396.202	203.919	10.5205		-334.79	-5229.56	158.795	0
2097	396.202	203.919	10.5205	8893.86	2760.52	-3277.77	1371.08	158.795	0	5818.91		5.00413	0.00381038	141.126	-54.3834	-1.03332	-0.126298	-116.785	-780.121	0	-1109.4	-4149.27	-775.076		-4783.71	366.685	10.398	8302.9			396.202	8893.86	-5179.91	-590.958		396.202	203.919	10.5205		-255.564	-5179.91	158.795	0
2098	396.202	203.919	10.5205	8893.86	2754.64	-3326.16	1371.08	158.795	0	5818.91		5.00413	0.00381038	141.126	-54.3834	-1.03332	-0.126298	-116.785	-777.069	0	-1058.12	-4154.21	-775.076		-4791.63	366.685	10.398	8294.97			396.202	8893.86	-5187.84	-598.883		396.202	203.919	10.5205		-258.55	-5187.84	158.795	0
2099	396.202	203.919	10.5205	8893.86	1454.26	-3371.17	1371.08	158.795	0	5818.91		5.00413	0.00381038	141.126	-54.3834	-1.03332	-0.126298	-116.785	-663.299	0	-305.729	-3880.11	-775.076		-5110.54	366.685	10.398	7976.07			396.202	8893.86	-5506.74	-917.786		396.202	203.919	10.5205		-851.555	-5506.74	158.795	0
2100	396.202	203.919	10.5205	8893.86	663.604	-3415.68	1371.08	158.795	0	5818.91		5.00413	0.00381038	141.126	-54.3834	-1.03332	-0.126298	-116.785	-578.984	0	229.464	-3654.86	-775.076		-5185.26	366.685	10.398	7901.35			396.202	8893.86	-5581.46	-992.508		396.202	203.919	10.5205		-1151.53	-5581.46	158.795	0

## Sheet: S3b-CN_NZ
AFOLU emissions time series for CN with a net zero climate neutrality constraint
Units: kt per annuam
Year																									Sc-3b
	Agriculture				Forest-old	Afforestation	Other land use				AD-Ag				AD-subtitutions				Wood-substitutions	LUC					AGGREGATION						AG		LULUCF			AGRICULTURE				LULUCF
	CO2	CH4	N2O	CO2e	CO2e	CO2e	CO2	CH4	N2O	CO2e	CO2	CH4	N2O	CO2e	CO2	CH4	N2O	CO2e	CO2e	CO2e	HWP	CCS-wood	CCS-AD		CO2	CH4	N2O	CO2e			CO2	CO2e	CO2	CO2e		CO2	CH4	N2O		CO2 ex BECCS	CO2 inc. BECCS	CH4	N2O
2020	515.052	519.844	27.5299	22366.1	-2082.32	0	3890	130	0.029	7537.69		0	0	0	0	0	0	0		0	-809.02				1513.71	649.844	27.5589	27012.5			515.052	22366.1	998.658	4646.34		515.052	519.844	27.5299		998.658	998.658	130	0.029
2021	515.052	519.844	27.5299	22366.1	-1440.38	0	2745	134	0.029	6504.69		0	0	0	0	0	0	0		0	-963				856.672	653.844	27.5589	26467.4			515.052	22366.1	341.62	4101.31		515.052	519.844	27.5299		341.62	341.62	134	0.029
2022	515.052	519.844	27.5299	22366.1	-1879	0	1934	139	0.029	5813		0	0	0	0	0	0	0		0	-866				-295.948	658.844	27.5589	25434.1			515.052	22366.1	-811	3068		515.052	519.844	27.5299		-811	-811	139	0.029
2023	498.956	503.599	26.6696	21667.2	1080.78	0	1758	140.7	0.029	5525.93		0	0	0	0	0	0	0		0	-1985.5				1352.24	644.299	26.6986	26288.4			498.956	21667.2	853.284	4621.22		498.956	503.599	26.6696		853.284	853.284	140.7	0.029
2024	482.861	487.354	25.8093	20968.2	-1157.5	-3.64615	1582	142.4	0.029	5238.86		0	0	0	0	0	0	0	-5409.38	0	-2564.15	0			-1660.44	629.754	25.8383	22481.8			482.861	20968.2	-2143.3	1513.57		482.861	487.354	25.8093		-2143.3	-2143.3	142.4	0.029
2025	466.766	471.109	24.949	20269.3	800.055	-12.3636	1406	144.1	0.029	4951.79		1.46832	0.0462421	53.3671	-127.49	0	0	-127.49	-5838.09	0	-2779.36	0	0		-118.901	616.677	25.0242	23282.8			466.766	20269.3	-585.667	3013.49		466.766	471.109	24.949		-585.667	-585.667	144.1	0.029
2026	450.67	454.864	24.0887	19570.4	415.773	-32.8589	1230	145.8	0.029	4664.73		2.17563	0.0377558	70.9228	-388.642	-0.206665	-0.0252596	-401.122	-5816.68	0	-2699.88	0	0		-636.295	602.633	24.1302	21989			450.67	19570.4	-1086.97	2418.68		450.67	454.864	24.0887		-1086.97	-1086.97	145.8	0.029
2027	434.575	438.618	23.2284	18871.4	320.294	-73.7804	1054	147.5	0.029	4377.66		2.88277	0.0292694	88.474	-649.766	-0.413329	-0.0505192	-674.726	-5215.24	0	-2261.05	0	0		-525.96	588.588	23.2361	21323			434.575	18871.4	-960.535	2451.6		434.575	438.618	23.2284		-960.535	-960.535	147.5	0.029
2028	418.479	422.373	22.3681	18172.5	615.799	-135.079	878	149.2	0.029	4090.59		3.5899	0.0207831	106.025	-910.886	-0.619994	-0.0757788	-948.327	-5279.89	0	-2249.95	0	0		-472.749	574.543	22.3421	20599.9			418.479	18172.5	-891.228	2427.39		418.479	422.373	22.3681		-891.228	-891.228	149.2	0.029
2029	402.384	406.128	21.5077	17473.5	927.138	-216.507	702	150.9	0.029	3803.52		4.29702	0.0122967	123.575	-1172	-0.826658	-0.101038	-1221.93	-5572.64	0	-2385.04	0	0		-570.02	560.499	21.448	19726.2			402.384	17473.5	-972.404	2252.69		402.384	406.128	21.5077		-972.404	-972.404	150.9	0.029
2030	386.289	389.883	20.6474	16774.6	1691.52	-317.558	526	147	0.029	4667		5.00413	0.00381038	141.126	-1433.12	-1.03332	-0.126298	-1495.53	-6725.84	590	-2601.73	0	0		274.523	540.854	20.5539	20944.9			386.289	16774.6	-111.766	4170.36		386.289	389.883	20.6474		-701.766	-701.766	147	0.029
2031	368.547	371.456	19.816	16020.6	2843.65	-440.188	568.254	147.59	0.02755	4724.6		5.00413	0.00381038	141.126	-1433.12	-1.03332	-0.126298	-1495.53	-6547.84	590	-2406.88	0	0		1523.39	523.017	19.721	21472.9			368.547	16020.6	1154.84	5452.3		368.547	371.456	19.816		564.838	564.838	147.59	0.02755
2032	350.806	353.029	18.9845	15266.5	3437.85	-591.416	610.508	148.18	0.0261	4782.19		5.00413	0.00381038	141.126	-1433.12	-1.03332	-0.126298	-1495.53	-6271.75	590	-2156.85	0	0		2240.9	505.179	18.8881	21469.4			350.806	15266.5	1890.09	6202.9		350.806	353.029	18.9845		1300.09	1300.09	148.18	0.0261
2033	333.064	334.602	18.1531	14512.5	3515.02	-770.03	652.763	148.769	0.02465	4839.79		5.00413	0.00381038	141.126	-1433.12	-1.03332	-0.126298	-1495.53	-6657.07	590	-2329.73	0	0		1991.09	487.342	18.0552	20498.7			333.064	14512.5	1658.03	5986.18		333.064	334.602	18.1531		1068.03	1068.03	148.769	0.02465
2034	315.323	316.175	17.3216	13758.4	5726.2	-971.016	695.017	149.359	0.0232	4897.38		5.00413	0.00381038	141.126	-1433.12	-1.03332	-0.126298	-1495.53	-7434.81	590	-2742.84	0	0		3612.69	469.505	17.2223	21399.3			315.323	13758.4	3297.36	7640.85		315.323	316.175	17.3216		2707.36	2707.36	149.359	0.0232
2035	297.581	297.748	16.4902	13004.4	4854.33	-1222.72	737.271	149.949	0.02175	4954.98		5.00413	0.00381038	141.126	-1433.12	-1.03332	-0.126298	-1495.53	-7538.15	590	-2868.05	-105.587	0		2282.83	451.667	16.3894	19348.5			297.581	13004.4	1985.25	6344.08		297.581	297.748	16.4902		1500.84	1395.25	149.949	0.02175
2036	279.84	279.321	15.6587	12250.4	4809.23	-1488.54	779.525	150.539	0.0203	5012.57		5.00413	0.00381038	141.126	-1433.12	-1.03332	-0.126298	-1495.53	-7655.21	590	-3008.55	-221.328	0		1740.17	433.83	15.5565	18084.9			279.84	12250.4	1460.33	5834.5		279.84	279.321	15.6587		1091.66	870.33	150.539	0.0203
2037	262.098	260.894	14.8273	11496.3	5262.7	-1774.26	821.78	151.128	0.01885	5070.17		5.00413	0.00381038	141.126	-1433.12	-1.03332	-0.126298	-1495.53	-7924.82	590	-3269.22	-351.764	0		1541.34	415.993	14.7236	17165.1			262.098	11496.3	1279.24	5668.75		262.098	260.894	14.8273		1041	689.238	151.128	0.01885
2038	244.357	242.466	13.9958	10742.3	4646.11	-2060.28	864.034	151.718	0.0174	5127.76		5.00413	0.00381038	141.126	-1433.12	-1.03332	-0.126298	-1495.53	-6956.61	590	-2657.96	-448.868	0		1177.39	398.155	13.8907	16080.2			244.357	10742.3	933.029	5337.89		244.357	242.466	13.9958		791.897	343.029	151.718	0.0174
2039	226.615	224.039	13.1644	9988.28	4116.6	-2345.6	906.288	152.308	0.01595	5185.36		5.00413	0.00381038	141.126	-1433.12	-1.03332	-0.126298	-1495.53	-6376.95	590	-2318.88	-551.456	0		623.561	380.318	13.0578	14805.4			226.615	9988.28	396.945	4817.14		226.615	224.039	13.1644		358.401	-193.055	152.308	0.01595
2040	208.874	205.612	12.3329	9234.24	2370.95	-2685.27	948.542	152.898	0.0145	5242.96		5.00413	0.00381038	141.126	-569.253	-1.03332	-0.126298	-631.655	-5402.98	590	-1669.57	-622.267	-156.177		-1014.92	362.481	12.2249	12446			208.874	9234.24	-1223.79	3211.75		208.874	205.612	12.3329		-1035.35	-1813.79	152.898	0.0145
2041	191.132	187.185	11.5015	8480.21	3673.08	-3015.4	990.797	153.487	0.01305	5300.55		5.00413	0.00381038	141.126	-547.8	-1.03332	-0.126298	-610.202	-6292.35	590	-2484.57	-816	-182.139		-1053.1	344.643	11.392	11686.9			191.132	8480.21	-1244.23	3206.65		191.132	187.185	11.5015		-836.096	-1834.23	153.487	0.01305
2042	173.391	168.758	10.67	7726.17	2475.5	-3368.62	1033.05	154.077	0.0116	5358.15		5.00413	0.00381038	141.126	-526.347	-1.03332	-0.126298	-588.749	-5497.69	590	-1944.33	-893.528	-208.081		-2142.62	326.806	10.5591	9876.38			173.391	7726.17	-2316.02	2150.21		173.391	168.758	10.67		-1804.41	-2906.02	154.077	0.0116
2043	155.649	150.331	9.83856	6972.14	1833.91	-3685.22	1075.31	154.667	0.01015	5415.74		5.00413	0.00381038	141.126	-504.894	-1.03332	-0.126298	-567.296	-4794.8	590	-1463.12	-963.435	-234.004		-2690.91	308.969	9.72622	8607.14			155.649	6972.14	-2846.56	1635		155.649	150.331	9.83856		-2239.12	-3436.56	154.667	0.01015
2044	137.908	131.904	9.00711	6218.1	1876.93	-4016.14	1117.56	155.257	0.0087	5473.34		5.00413	0.00381038	141.126	-483.441	-1.03332	-0.126298	-545.843	-4382.52	590	-1222.85	-1052.5	-259.908		-2828.99	291.131	8.89332	7748.11			137.908	6218.1	-2966.9	1530		137.908	131.904	9.00711		-2244.49	-3556.9	155.257	0.0087
2045	120.166	113.477	8.17565	5464.07	1691.82	-4333.19	1159.81	155.846	0.00725	5530.93		5.00413	0.00381038	141.126	-461.988	-1.03332	-0.126298	-524.39	-4170.7	590	-1161.61	-1162.28	-285.792		-3381.07	273.294	8.06042	6475.08			120.166	5464.07	-3501.24	1011.01		120.166	113.477	8.17565		-2643.17	-4091.24	155.846	0.00725
2046	102.425	95.0499	7.3442	4710.04	1582.75	-4660.45	1202.07	156.436	0.0058	5588.53		5.00413	0.00381038	141.126	-440.535	-1.03332	-0.126298	-502.937	-4064.5	590	-1204.41	-1289.15	-311.657		-3988.42	255.457	7.22751	5146.78			102.425	4710.04	-4090.85	436.74		102.425	95.0499	7.3442		-3080.04	-4680.85	156.436	0.0058
2047	84.6833	76.6228	6.51275	3956	1573.34	-4977.05	1244.32	157.026	0.00435	5646.13		5.00413	0.00381038	141.126	-419.082	-1.03332	-0.126298	-481.484	-4083.21	590	-1383	-1444.07	-337.503		-4649.28	237.62	6.39461	3764.97			84.6833	3956	-4733.96	-191.034		84.6833	76.6228	6.51275		-3542.39	-5323.96	157.026	0.00435
2048	66.9418	58.1958	5.6813	3201.97	2046.14	-5293.73	1286.58	157.616	0.0029	5703.72		5.00413	0.00381038	141.126	-397.63	-1.03332	-0.126298	-460.032	-4137.87	590	-1616.26	-1620.52	-363.329		-4904.18	219.782	5.56171	2789.11			66.9418	3201.97	-4971.13	-412.855		66.9418	58.1958	5.6813		-3577.27	-5561.13	157.616	0.0029
2049	49.2003	39.7687	4.84984	2447.93	1406.12	-5575.29	1328.83	158.205	0.00145	5761.32		5.00413	0.00381038	141.126	-376.177	-1.03332	-0.126298	-438.579	-3913.72	590	-1554.09	-1747.33	-389.136		-5891.69	201.945	4.72881	1080.65			49.2003	2447.93	-5940.89	-1367.28		49.2003	39.7687	4.84984		-4394.43	-6530.89	158.205	0.00145
2050	31.4588	21.3416	4.01839	1693.9	2056.63	-5846.23	1371.08	158.795	0	5818.91		5.00413	0.00381038	141.126	-354.724	-1.03332	-0.126298	-417.126	-3748.14	0	-1561.37	-1892.73	-414.923		-6256.07	184.108	3.89591	-4.67772			31.4588	1693.9	-6287.53	-1698.58		31.4588	21.3416	4.01839		-3979.88	-6287.53	158.795	0
2051	31.4588	21.3416	4.01839	1693.9	1513.14	-5976.1	1371.08	158.795	0	5818.91		5.00413	0.00381038	141.126	-333.271	-1.03332	-0.126298	-395.673	-4134.31	0	-2277.88	-2217.8	-440.691		-7996.79	184.108	3.89591	-1745.4			31.4588	1693.9	-8028.25	-3439.29		31.4588	21.3416	4.01839		-5369.75	-8028.25	158.795	0
2052	31.4588	21.3416	4.01839	1693.9	136.204	-6211.44	1371.08	158.795	0	5818.91		5.00413	0.00381038	141.126	-311.818	-1.03332	-0.126298	-374.22	-3122.39	0	-1179.54	-2097.91	-466.44		-8416.57	184.108	3.89591	-2165.18			31.4588	1693.9	-8448.03	-3859.08		31.4588	21.3416	4.01839		-5883.69	-8448.03	158.795	0
2053	31.4588	21.3416	4.01839	1693.9	110.359	-6010.9	1371.08	158.795	0	5818.91		5.00413	0.00381038	141.126	-290.365	-1.03332	-0.126298	-352.767	-3177.58	0	-1517.36	-2332.04	-492.169		-8839.57	184.108	3.89591	-2588.18			31.4588	1693.9	-8871.03	-4282.08		31.4588	21.3416	4.01839		-6046.82	-8871.03	158.795	0
2054	31.4588	21.3416	4.01839	1693.9	-53.9678	-6164.27	1371.08	158.795	0	5818.91		5.00413	0.00381038	141.126	-268.912	-1.03332	-0.126298	-331.314	-3070.68	0	-1650.59	-2521.41	-517.879		-9505.58	184.108	3.89591	-3254.18			31.4588	1693.9	-9537.04	-4948.08		31.4588	21.3416	4.01839		-6497.74	-9537.04	158.795	0
2055	31.4588	21.3416	4.01839	1693.9	-36.9913	-6079.88	1371.08	158.795	0	5818.91		5.00413	0.00381038	141.126	-247.459	-1.03332	-0.126298	-309.861	-2823.12	0	-1571.75	-2654.77	-543.57		-9484.42	184.108	3.89591	-3233.02			31.4588	1693.9	-9515.87	-4926.92		31.4588	21.3416	4.01839		-6317.54	-9515.87	158.795	0
2056	31.4588	21.3416	4.01839	1693.9	-509.107	-6211.96	1371.08	158.795	0	5818.91		5.00413	0.00381038	141.126	-226.006	-1.03332	-0.126298	-288.408	-2570.7	0	-1478.11	-2788.08	-569.241		-10154	184.108	3.89591	-3902.57			31.4588	1693.9	-10185.4	-5596.47		31.4588	21.3416	4.01839		-6828.1	-10185.4	158.795	0
2057	31.4588	21.3416	4.01839	1693.9	-571.848	-6330.66	1371.08	158.795	0	5818.91		5.00413	0.00381038	141.126	-204.554	-1.03332	-0.126298	-266.956	-2373.65	0	-1491.98	-2953.19	-594.893		-10540	184.108	3.89591	-4288.64			31.4588	1693.9	-10571.5	-5982.53		31.4588	21.3416	4.01839		-7023.4	-10571.5	158.795	0
2058	31.4588	21.3416	4.01839	1693.9	883.971	-6119.82	1371.08	158.795	0	5818.91		5.00413	0.00381038	141.126	-183.101	-1.03332	-0.126298	-245.503	-2603.93	0	-2473.24	-3454.98	-620.525		-10382	184.108	3.89591	-4130.65			31.4588	1693.9	-10413.5	-5824.55		31.4588	21.3416	4.01839		-6338	-10413.5	158.795	0
2059	31.4588	21.3416	4.01839	1693.9	934.149	-6239.39	1371.08	158.795	0	5818.91		5.00413	0.00381038	141.126	-161.648	-1.03332	-0.126298	-224.05	-2387.43	0	-2551.76	-3688.93	-646.139		-10789.5	184.108	3.89591	-4538.13			31.4588	1693.9	-10821	-6232.03		31.4588	21.3416	4.01839		-6485.92	-10821	158.795	0
2060	31.4588	21.3416	4.01839	1693.9	61.2125	-6394.6	1371.08	158.795	0	5818.91		5.00413	0.00381038	141.126	-140.195	-1.03332	-0.126298	-202.597	-2015.52	0	-2225.03	-3788.11	-671.732		-11615.7	184.108	3.89591	-5364.32			31.4588	1693.9	-11647.2	-7058.21		31.4588	21.3416	4.01839		-7187.33	-11647.2	158.795	0
2061	31.4588	21.3416	4.01839	1693.9	66.3294	-6388.04	1371.08	158.795	0	5818.91		5.00413	0.00381038	141.126	-118.742	-1.03332	-0.126298	-181.144	-1810.94	0	-2387.46	-4054.35	-697.568		-12058.5	184.108	3.89591	-5807.15			31.4588	1693.9	-12090	-7501.05		31.4588	21.3416	4.01839		-7338.08	-12090	158.795	0
2062	31.4588	21.3416	4.01839	1693.9	-100.958	-6502.16	1371.08	158.795	0	5818.91		5.00413	0.00381038	141.126	-97.2891	-1.03332	-0.126298	-159.691	-1420.12	0	-1896.11	-4087.52	-723.404		-11907.6	184.108	3.89591	-5656.21			31.4588	1693.9	-11939.1	-7350.11		31.4588	21.3416	4.01839		-7128.14	-11939.1	158.795	0
2063	31.4588	21.3416	4.01839	1693.9	-105.637	-6466.08	1371.08	158.795	0	5818.91		5.00413	0.00381038	141.126	-75.8362	-1.03332	-0.126298	-138.238	-1150.42	0	-1818.62	-4259.35	-749.24		-11996.4	184.108	3.89591	-5744.99			31.4588	1693.9	-12027.8	-7438.89		31.4588	21.3416	4.01839		-7019.25	-12027.8	158.795	0
2064	31.4588	21.3416	4.01839	1693.9	-1048.41	-6390.92	1371.08	158.795	0	5818.91		5.00413	0.00381038	141.126	-54.3834	-1.03332	-0.126298	-116.785	-850.097	0	-1536.97	-4355.33	-775.076		-12704.2	184.108	3.89591	-6452.77			31.4588	1693.9	-12735.6	-8146.67		31.4588	21.3416	4.01839		-7605.22	-12735.6	158.795	0
2065	31.4588	21.3416	4.01839	1693.9	-436.163	-6173.34	1371.08	158.795	0	5818.91		5.00413	0.00381038	141.126	-54.3834	-1.03332	-0.126298	-116.785	-976.721	0	-2276.39	-4731.01	-775.076		-12989.4	184.108	3.89591	-6738.04			31.4588	1693.9	-13020.9	-8431.94		31.4588	21.3416	4.01839		-7514.81	-13020.9	158.795	0
2066	31.4588	21.3416	4.01839	1693.9	-806.42	-6179.31	1371.08	158.795	0	5818.91		5.00413	0.00381038	141.126	-54.3834	-1.03332	-0.126298	-116.785	-908.33	0	-1780.71	-4576.44	-775.076		-12715.4	184.108	3.89591	-6464.03			31.4588	1693.9	-12746.9	-8157.93		31.4588	21.3416	4.01839		-7395.36	-12746.9	158.795	0
2067	31.4588	21.3416	4.01839	1693.9	-575.472	-6080.36	1371.08	158.795	0	5818.91		5.00413	0.00381038	141.126	-54.3834	-1.03332	-0.126298	-116.785	-935.803	0	-1897.44	-4678.08	-775.076		-12603.9	184.108	3.89591	-6352.49			31.4588	1693.9	-12635.3	-8046.39		31.4588	21.3416	4.01839		-7182.19	-12635.3	158.795	0
2068	31.4588	21.3416	4.01839	1693.9	1617.07	-6068.81	1371.08	158.795	0	5818.91		5.00413	0.00381038	141.126	-54.3834	-1.03332	-0.126298	-116.785	-1220.23	0	-3628.14	-5453.7	-775.076		-12906.1	184.108	3.89591	-6654.72			31.4588	1693.9	-12937.6	-8348.62		31.4588	21.3416	4.01839		-6708.8	-12937.6	158.795	0
2069	31.4588	21.3416	4.01839	1693.9	876.26	-6273.43	1371.08	158.795	0	5818.91		5.00413	0.00381038	141.126	-54.3834	-1.03332	-0.126298	-116.785	-1121.16	0	-2880.24	-5273.5	-775.076		-12923.4	184.108	3.89591	-6672.05			31.4588	1693.9	-12954.9	-8365.94		31.4588	21.3416	4.01839		-6906.33	-12954.9	158.795	0
2070	31.4588	21.3416	4.01839	1693.9	1933.32	-5956.23	1371.08	158.795	0	5818.91		5.00413	0.00381038	141.126	-54.3834	-1.03332	-0.126298	-116.785	-1271.68	0	-3738.24	-5712.11	-775.076		-12845.8	184.108	3.89591	-6594.39			31.4588	1693.9	-12877.2	-8288.29		31.4588	21.3416	4.01839		-6390.06	-12877.2	158.795	0
2071	31.4588	21.3416	4.01839	1693.9	484.012	-6515.83	1371.08	158.795	0	5818.91		5.00413	0.00381038	141.126	-54.3834	-1.03332	-0.126298	-116.785	-1161.65	0	-2923.34	-5494.04	-775.076		-13821.7	184.108	3.89591	-7570.34			31.4588	1693.9	-13853.2	-9264.24		31.4588	21.3416	4.01839		-7584.07	-13853.2	158.795	0
2072	31.4588	21.3416	4.01839	1693.9	270.924	-6459.38	1371.08	158.795	0	5818.91		5.00413	0.00381038	141.126	-54.3834	-1.03332	-0.126298	-116.785	-1052.07	0	-2144.84	-5248.35	-775.076		-12954.2	184.108	3.89591	-6702.79			31.4588	1693.9	-12985.6	-8396.69		31.4588	21.3416	4.01839		-6962.22	-12985.6	158.795	0
2073	31.4588	21.3416	4.01839	1693.9	79.6252	-6640.99	1371.08	158.795	0	5818.91		5.00413	0.00381038	141.126	-54.3834	-1.03332	-0.126298	-116.785	-1064.31	0	-2148.85	-5326.88	-775.076		-13409.6	184.108	3.89591	-7158.24			31.4588	1693.9	-13441.1	-8852.14		31.4588	21.3416	4.01839		-7339.13	-13441.1	158.795	0
2074	31.4588	21.3416	4.01839	1693.9	1025.79	-6940.41	1371.08	158.795	0	5818.91		5.00413	0.00381038	141.126	-54.3834	-1.03332	-0.126298	-116.785	-1148.57	0	-2607.52	-5591.21	-775.076		-13485.9	184.108	3.89591	-7234.49			31.4588	1693.9	-13517.3	-8928.39		31.4588	21.3416	4.01839		-7151.05	-13517.3	158.795	0
2075	31.4588	21.3416	4.01839	1693.9	1464.27	-6974.79	1371.08	158.795	0	5818.91		5.00413	0.00381038	141.126	-54.3834	-1.03332	-0.126298	-116.785	-1184.14	0	-2751.8	-5722.22	-775.076		-13357.1	184.108	3.89591	-7105.69			31.4588	1693.9	-13388.5	-8799.59		31.4588	21.3416	4.01839		-6891.24	-13388.5	158.795	0
2076	31.4588	21.3416	4.01839	1693.9	2516.45	-7387.59	1371.08	158.795	0	5818.91		5.00413	0.00381038	141.126	-54.3834	-1.03332	-0.126298	-116.785	-1260.42	0	-3140.28	-5977.3	-775.076		-13361.3	184.108	3.89591	-7109.86			31.4588	1693.9	-13392.7	-8803.76		31.4588	21.3416	4.01839		-6640.33	-13392.7	158.795	0
2077	31.4588	21.3416	4.01839	1693.9	2026.06	-7295.51	1371.08	158.795	0	5818.91		5.00413	0.00381038	141.126	-54.3834	-1.03332	-0.126298	-116.785	-1253.75	0	-2996.07	-6017.99	-775.076		-13656	184.108	3.89591	-7404.65			31.4588	1693.9	-13687.5	-9098.55		31.4588	21.3416	4.01839		-6894.44	-13687.5	158.795	0
2078	31.4588	21.3416	4.01839	1693.9	1623.44	-7708.5	1371.08	158.795	0	5818.91		5.00413	0.00381038	141.126	-54.3834	-1.03332	-0.126298	-116.785	-1207.66	0	-2610.81	-5948.21	-775.076		-14016.6	184.108	3.89591	-7765.22			31.4588	1693.9	-14048.1	-9459.11		31.4588	21.3416	4.01839		-7324.78	-14048.1	158.795	0
2079	31.4588	21.3416	4.01839	1693.9	1606.69	-7831.9	1371.08	158.795	0	5818.91		5.00413	0.00381038	141.126	-54.3834	-1.03332	-0.126298	-116.785	-1240.63	0	-2728.97	-6092.17	-775.076		-14418.9	184.108	3.89591	-8167.5			31.4588	1693.9	-14450.3	-9861.39		31.4588	21.3416	4.01839		-7583.1	-14450.3	158.795	0
2080	31.4588	21.3416	4.01839	1693.9	1995.18	-7485.65	1371.08	158.795	0	5818.91		5.00413	0.00381038	141.126	-54.3834	-1.03332	-0.126298	-116.785	-1329.74	0	-3201.58	-6375.25	-775.076		-14439.8	184.108	3.89591	-8188.44			31.4588	1693.9	-14471.3	-9882.34		31.4588	21.3416	4.01839		-7320.97	-14471.3	158.795	0
2081	31.4588	21.3416	4.01839	1693.9	2315.16	-7441.68	1371.08	158.795	0	5818.91		5.00413	0.00381038	141.126	-54.3834	-1.03332	-0.126298	-116.785	-1369.52	0	-3342.49	-6549.31	-775.076		-14390.9	184.108	3.89591	-8139.46			31.4588	1693.9	-14422.3	-9833.36		31.4588	21.3416	4.01839		-7097.92	-14422.3	158.795	0
2082	31.4588	21.3416	4.01839	1693.9	1719.59	-7391.58	1371.08	158.795	0	5818.91		5.00413	0.00381038	141.126	-54.3834	-1.03332	-0.126298	-116.785	-1306.04	0	-2839.95	-6433.43	-775.076		-14317.9	184.108	3.89591	-8066.51			31.4588	1693.9	-14349.4	-9760.41		31.4588	21.3416	4.01839		-7140.86	-14349.4	158.795	0
2083	31.4588	21.3416	4.01839	1693.9	1254.2	-7270.06	1371.08	158.795	0	5818.91		5.00413	0.00381038	141.126	-54.3834	-1.03332	-0.126298	-116.785	-1338.3	0	-2954.93	-6561.98	-775.076		-14905.3	184.108	3.89591	-8653.91			31.4588	1693.9	-14936.8	-10347.8		31.4588	21.3416	4.01839		-7599.7	-14936.8	158.795	0
2084	31.4588	21.3416	4.01839	1693.9	1037.95	-7545.02	1371.08	158.795	0	5818.91		5.00413	0.00381038	141.126	-54.3834	-1.03332	-0.126298	-116.785	-1300.08	0	-2619.59	-6513.89	-775.076		-15013.1	184.108	3.89591	-8761.69			31.4588	1693.9	-15044.5	-10455.6		31.4588	21.3416	4.01839		-7755.58	-15044.5	158.795	0
2085	31.4588	21.3416	4.01839	1693.9	2719.41	-7611.31	1371.08	158.795	0	5818.91		5.00413	0.00381038	141.126	-54.3834	-1.03332	-0.126298	-116.785	-1452.27	0	-3498.56	-6948.7	-775.076		-14711.7	184.108	3.89591	-8460.29			31.4588	1693.9	-14743.1	-10154.2		31.4588	21.3416	4.01839		-7019.37	-14743.1	158.795	0
2086	31.4588	21.3416	4.01839	1693.9	2689.13	-7048.71	1371.08	158.795	0	5818.91		5.00413	0.00381038	141.126	-54.3834	-1.03332	-0.126298	-116.785	-1492.93	0	-3634.82	-7131.39	-775.076		-14498.3	184.108	3.89591	-8246.93			31.4588	1693.9	-14529.8	-9940.83		31.4588	21.3416	4.01839		-6623.32	-14529.8	158.795	0
2087	31.4588	21.3416	4.01839	1693.9	2354.86	-7323.25	1371.08	158.795	0	5818.91		5.00413	0.00381038	141.126	-54.3834	-1.03332	-0.126298	-116.785	-1439.83	0	-3184.58	-7054.95	-775.076		-14580.4	184.108	3.89591	-8329.05			31.4588	1693.9	-14611.9	-10023		31.4588	21.3416	4.01839		-6781.88	-14611.9	158.795	0
2088	31.4588	21.3416	4.01839	1693.9	2073.92	-7284.62	1371.08	158.795	0	5818.91		5.00413	0.00381038	141.126	-54.3834	-1.03332	-0.126298	-116.785	-1417.38	0	-2944.21	-7046.01	-775.076		-14573.5	184.108	3.89591	-8322.06			31.4588	1693.9	-14604.9	-10016		31.4588	21.3416	4.01839		-6783.82	-14604.9	158.795	0
2089	31.4588	21.3416	4.01839	1693.9	2274.41	-7008.41	1371.08	158.795	0	5818.91		5.00413	0.00381038	141.126	-54.3834	-1.03332	-0.126298	-116.785	-1515.91	0	-3470.84	-7354.26	-775.076		-14931.6	184.108	3.89591	-8680.23			31.4588	1693.9	-14963.1	-10374.1		31.4588	21.3416	4.01839		-6833.75	-14963.1	158.795	0
2090	31.4588	21.3416	4.01839	1693.9	1894.34	-7408.38	1371.08	158.795	0	5818.91		5.00413	0.00381038	141.126	-54.3834	-1.03332	-0.126298	-116.785	-1411.49	0	-2699.75	-7146.83	-775.076		-14733.1	184.108	3.89591	-8481.75			31.4588	1693.9	-14764.6	-10175.6		31.4588	21.3416	4.01839		-6842.7	-14764.6	158.795	0
2091	31.4588	21.3416	4.01839	1693.9	1781.78	-6853.91	1371.08	158.795	0	5818.91		5.00413	0.00381038	141.126	-54.3834	-1.03332	-0.126298	-116.785	-1450.18	0	-2854.02	-7301.47	-775.076		-14600.1	184.108	3.89591	-8348.76			31.4588	1693.9	-14631.6	-10042.7		31.4588	21.3416	4.01839		-6555.07	-14631.6	158.795	0
2092	31.4588	21.3416	4.01839	1693.9	2635.08	-6662.45	1371.08	158.795	0	5818.91		5.00413	0.00381038	141.126	-54.3834	-1.03332	-0.126298	-116.785	-1544.81	0	-3356.11	-7603.8	-775.076		-14359.8	184.108	3.89591	-8108.42			31.4588	1693.9	-14391.3	-9802.32		31.4588	21.3416	4.01839		-6012.39	-14391.3	158.795	0
2093	31.4588	21.3416	4.01839	1693.9	2913.93	-6686.59	1371.08	158.795	0	5818.91		5.00413	0.00381038	141.126	-54.3834	-1.03332	-0.126298	-116.785	-1603.44	0	-3618.16	-7815.17	-775.076		-14578.5	184.108	3.89591	-8327.15			31.4588	1693.9	-14610	-10021		31.4588	21.3416	4.01839		-6019.75	-14610	158.795	0
2094	31.4588	21.3416	4.01839	1693.9	2061.28	-6602.26	1371.08	158.795	0	5818.91		5.00413	0.00381038	141.126	-54.3834	-1.03332	-0.126298	-116.785	-1477.72	0	-2717.36	-7536.4	-775.076		-14167.3	184.108	3.89591	-7915.89			31.4588	1693.9	-14198.7	-9609.79		31.4588	21.3416	4.01839		-5887.26	-14198.7	158.795	0
2095	31.4588	21.3416	4.01839	1693.9	2160.7	-6776.31	1371.08	158.795	0	5818.91		5.00413	0.00381038	141.126	-54.3834	-1.03332	-0.126298	-116.785	-1482.91	0	-2663	-7598.07	-775.076		-14249.2	184.108	3.89591	-7997.82			31.4588	1693.9	-14280.7	-9691.72		31.4588	21.3416	4.01839		-5907.52	-14280.7	158.795	0
2096	31.4588	21.3416	4.01839	1693.9	2675.25	-6404.53	1371.08	158.795	0	5818.91		5.00413	0.00381038	141.126	-54.3834	-1.03332	-0.126298	-116.785	-1586.49	0	-3231.85	-7912.01	-775.076		-14245.7	184.108	3.89591	-7994.28			31.4588	1693.9	-14277.1	-9688.18		31.4588	21.3416	4.01839		-5590.05	-14277.1	158.795	0
2097	31.4588	21.3416	4.01839	1693.9	2760.52	-6036.04	1371.08	158.795	0	5818.91		5.00413	0.00381038	141.126	-54.3834	-1.03332	-0.126298	-116.785	-1602.31	0	-3223.8	-8018.37	-775.076		-13890.2	184.108	3.89591	-7638.82			31.4588	1693.9	-13921.7	-9332.72		31.4588	21.3416	4.01839		-5128.23	-13921.7	158.795	0
2098	31.4588	21.3416	4.01839	1693.9	2754.64	-5145.26	1371.08	158.795	0	5818.91		5.00413	0.00381038	141.126	-54.3834	-1.03332	-0.126298	-116.785	-1595.61	0	-3081.32	-8051.5	-775.076		-12896	184.108	3.89591	-6644.58			31.4588	1693.9	-12927.4	-8338.48		31.4588	21.3416	4.01839		-4100.85	-12927.4	158.795	0
2099	31.4588	21.3416	4.01839	1693.9	1454.26	-5608.26	1371.08	158.795	0	5818.91		5.00413	0.00381038	141.126	-54.3834	-1.03332	-0.126298	-116.785	-1507.24	0	-2422.74	-7881.68	-775.076		-13831	184.108	3.89591	-7579.56			31.4588	1693.9	-13862.4	-9273.46		31.4588	21.3416	4.01839		-5205.66	-13862.4	158.795	0
2100	31.4588	21.3416	4.01839	1693.9	663.604	-5855.54	1371.08	158.795	0	5818.91		5.00413	0.00381038	141.126	-54.3834	-1.03332	-0.126298	-116.785	-1397.98	0	-1663.08	-7627.21	-775.076		-13854.8	184.108	3.89591	-7603.36			31.4588	1693.9	-13886.2	-9297.26		31.4588	21.3416	4.01839		-5483.93	-13886.2	158.795	0

[truncated: 7 more sheets: S3c-CN_SG, S4a-DP, S4b-DP_NZ, S4c-DP_SG, S5a-BE, S5b-BE_NZ, S5c-BE_SG]
